# Supplementary material for: Highly stable and self-repairing membrane-mimetic 2D nanomaterials assembled from lipid-like peptoids
Source: PubMed Central journal article supplement (PMC4945955; doi:10.1038/ncomms12252), 2016-07-12
Supplement: ncomms12252-s1.pdf [file ncomms12252-s1.pdf]

1 **Supplementary Figures**

2

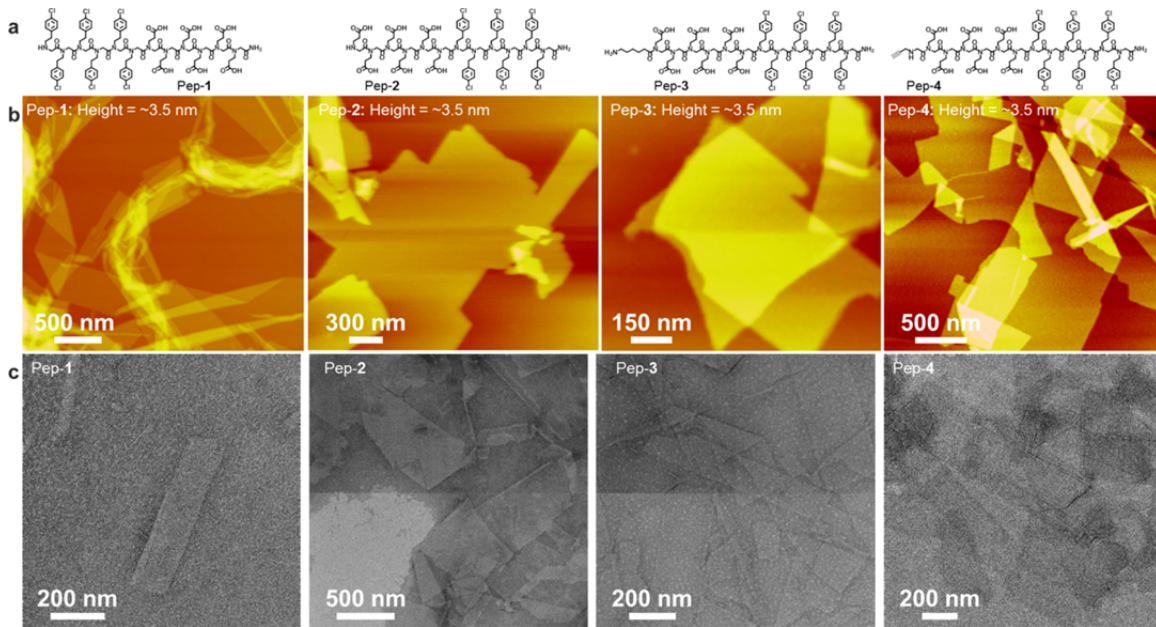

3

4 **Supplementary Figure 1 | 2D membranes assembled from lipid-like peptoids. a,**  
5 Structures of membrane-forming peptoids Pep-1 – Pep-4. **b,** AFM images of biomimetic  
6 membranes assembled from Pep-1, Pep-2, Pep-3, and Pep-4. These membranes exhibit a  
7 similar height of ~3.5 nm. **c,** TEM images of biomimetic membranes assembled from  
8 Pep-1, Pep-2, Pep-3, and Pep-4; 2% phosphotungstic acid was used for negative staining.

9

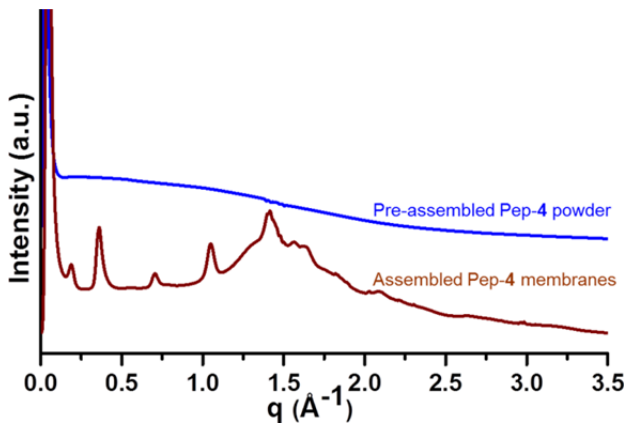

10

11

12 **Supplementary Figure 2 | XRD data of Pep-4 membranes and pre-assembled Pep-4**  
13 **powder.** XRD data show that pre-assembled Pep-4 lyophilized from its H<sub>2</sub>O and CH<sub>3</sub>CN  
14 (1:1) solution is amorphous before they are crystallized into highly-ordered membrane  
15 structures.

16

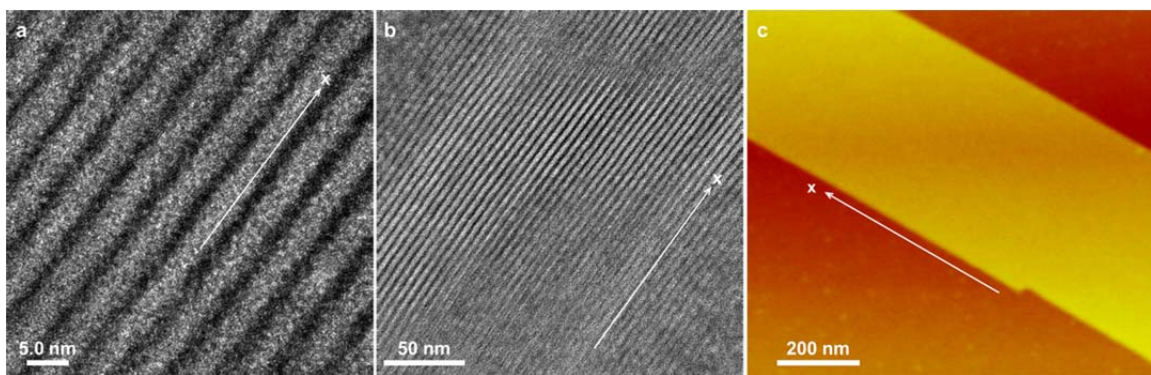

17  
18  
19  
20  
21  
22  
23  
24  
25  
26  
27  
28  
29  
30

**Supplementary Figure 3 | TEM and AFM characterizations of Pep-5 membranes.** **a** and **b**, high resolution TEM images to show the well-aligned hydrophilic strips of Pep-5 membranes along x-direction. **c**, AFM image of one Pep-5 membrane with height  $\sim 4.0$  nm, the x-direction was labeled for comparison.

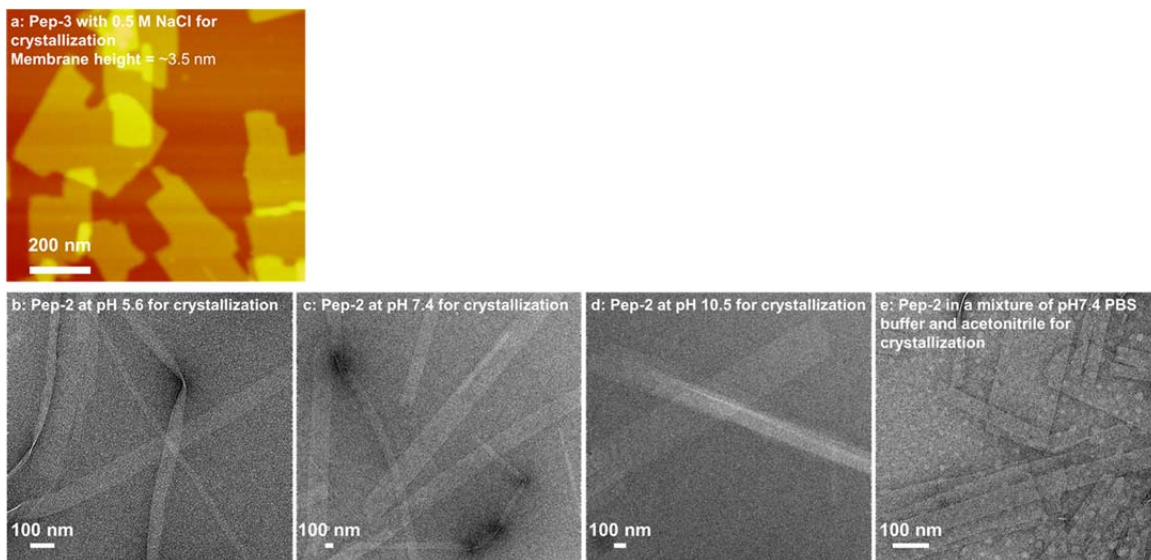

31  
32  
33  
34  
35  
36  
37  
38  
39

**Supplementary Figure 4 | The importance of inter-peptoid hydrophobic interactions in the assembly of biomimetic membranes.** **a**, AFM image of biomimetic membranes assembled from Pep-3 with the presence of over 0.5M NaCl. **b - e**, TEM images of biomimetic membranes assembled from Pep-2 in the mixture of water and acetonitrile ( $v/v = 1:1$ ) at pH 5.6 (**b**), pH 7.4 (**c**), pH 10.5, and in a mixture of PBS (1X, pH 7.4) buffer and acetonitrile ( $v/v = 1:1$ ) (**d**).

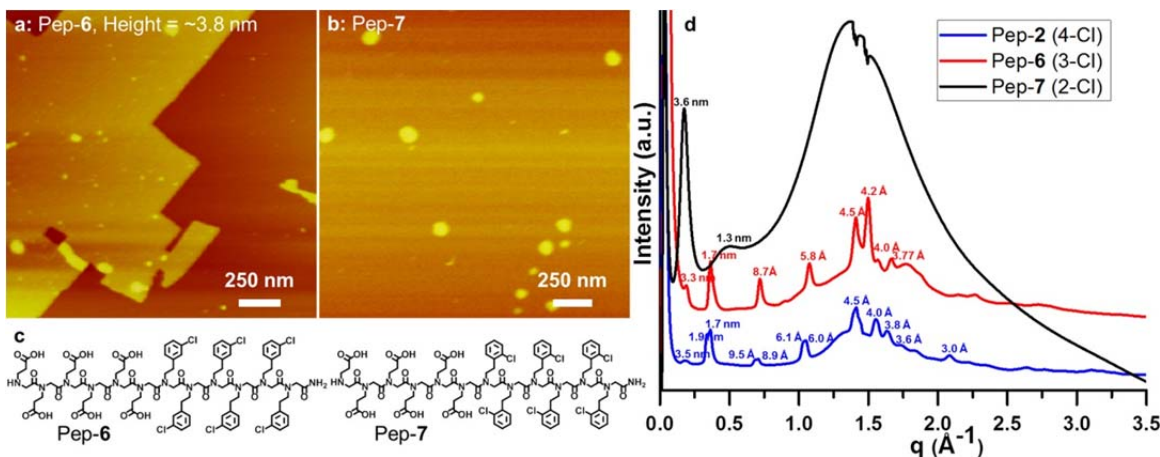

40  
 41 **Supplementary Figure 5 | The influence of -Cl positions in the assembly of**  
 42 **biomimetic membranes.** **a**, An AFM image showing the biomimetic membranes  
 43 assembled from Pep-6. **b**, An AFM image showing the nanoparticles assembled from  
 44 Pep-7. **c**, Structures of Pep-6 with six N-[2-(3-chlorophenyl)ethyl]glycines (N<sub>3-Cl</sub>pe) and  
 45 Pep-7 with six N-[2-(2-chlorophenyl)ethyl]glycines (N<sub>2-Cl</sub>pe). **d**, XRD data showing  
 46 biomimetic membranes assembled from both Pep-2 (with six N<sub>4-Cl</sub>pe) and Pep-6 (with six  
 47 N<sub>3-Cl</sub>pe) are highly-crystalline, while nanoparticles assembled from Pep-7 (with six N<sub>2-</sub>  
 48 Clpe) are amorphous; The change of the -Cl locations in hydrophobic side chains caused  
 49 different packings of hydrophobic domains, the formation of amorphous nanoparticles  
 50 induced by Pep-2 is probably due to the weak hydrophobic interactions as a result of  
 51 large steric hindrance caused by N<sub>2-Cl</sub>pe side chains.  
 52



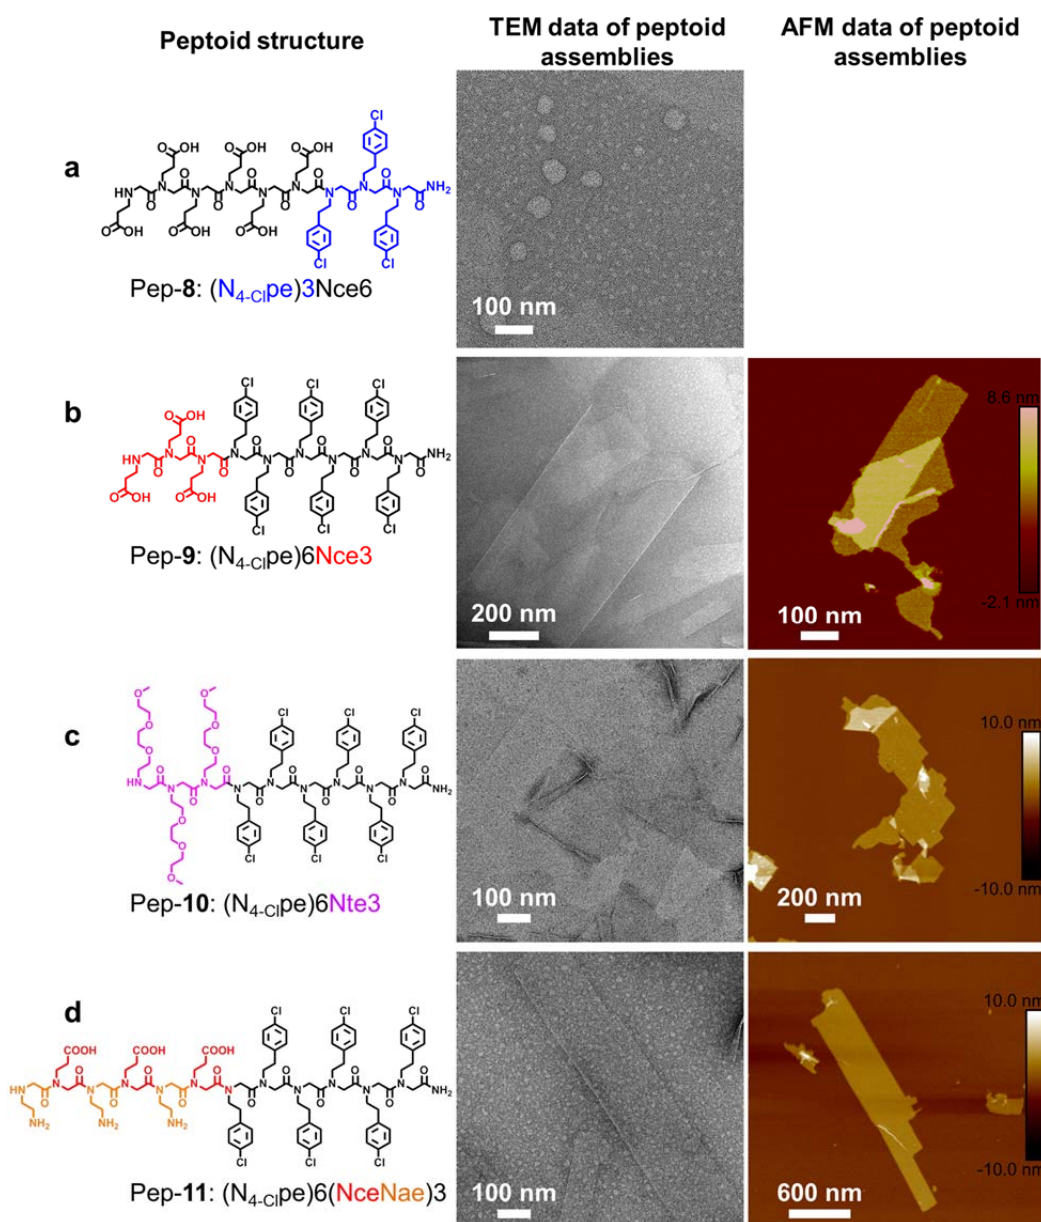

53  
54 **Supplementary Figure 6 | The ordering of hydrophobic domains is the key to**  
55 **forming membrane structures.** **a**, Structure of Pep-8 which has only three hydrophobic  
56 N<sub>4-Clpe</sub> residues; TEM data show that three N<sub>4-Clpe</sub> residues are not enough to stabilize  
57 the membrane structure. **b**, Structure of Pep-9 which has six N<sub>4-Clpe</sub> and three hydrophilic  
58 Nce residues; TEM and AFM data show that Pep-9 self-assemble into membranes even  
59 with three Nce residues as hydrophilic domain. **c**, Structure of Pep-10 which has six N<sub>4-</sub>  
60 Clpe and three hydrophilic Nte residues; TEM and AFM data show that Pep-10 self-  
61 assemble into membranes even with three Nte as the hydrophilic domain; biomimetic  
62 membranes assembled from Pep-10 in the mixture of PBS (1X, pH 7.4) buffer and  
63 acetonitrile (v/v = 1:1). **d**, Structure of Pep-11 which has six N<sub>4-Clpe</sub>, three Nce and three  
64 Nae residues; TEM and AFM data show that Pep-10 self-assemble into membranes when  
65 hydrophilic domain has half Nce and half Nae residues; biomimetic membranes  
66 assembled from Pep-11 in the mixture of PBS (1X, pH 7.4) buffer and acetonitrile (v/v =  
67 1:1).

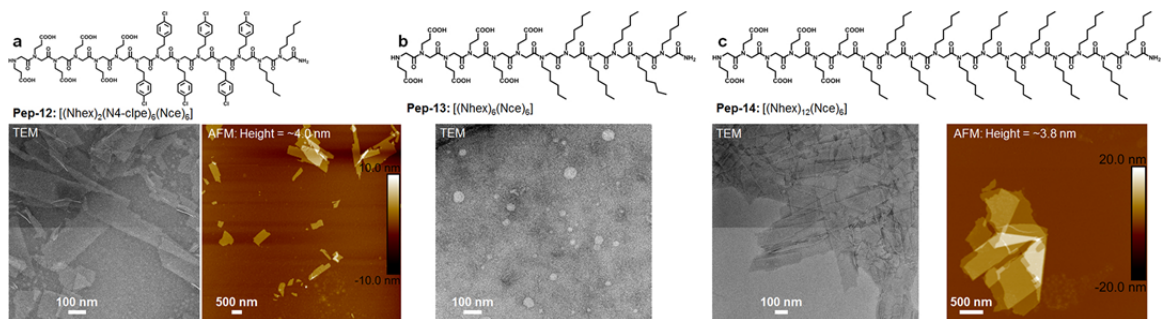

68  
69  
70  
71  
72  
73  
74  
75  
76  
77  
78

**Supplementary Figure 7 | The significance of hydrophobic interactions in the membrane formation and the similarity of designed peptoids and lipids. a**, Structure of Pep-12 [(Nhex)<sub>2</sub>(N4-clpe)<sub>6</sub>(Nce)<sub>6</sub>] and the TEM and AFM data of its self-assembled membranes. **b**, Structure of Pep-13 [(Nhex)<sub>6</sub>(Nce)<sub>6</sub>] and the TEM data of its assemblies. **c**, Structure of Pep-14 [(Nhex)<sub>12</sub>(Nce)<sub>6</sub>] and the TEM and AFM data of its self-assembled membranes.

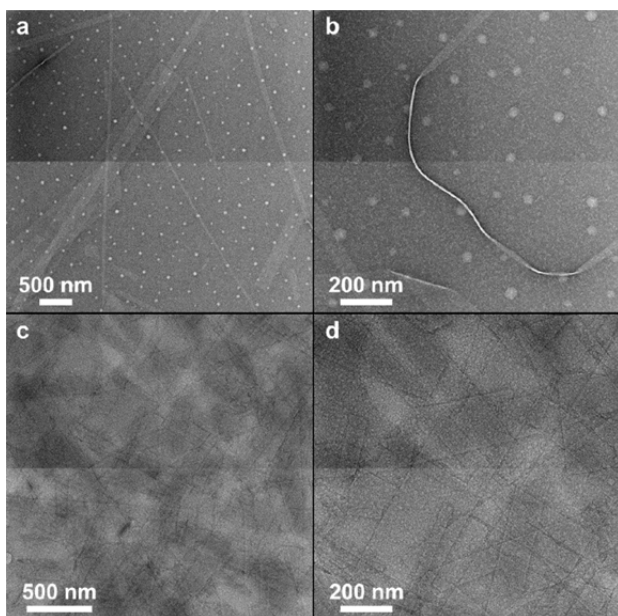

79  
80  
81  
82  
83  
84  
85  
86

**Supplementary Figure 8 | Peptoid membrane formation is through an anisotropic crystallization process. a and b**, Pep-3 nanoparticles and nanoribbons formed about one day later. **c and d**, Pep-3 membranes formed about two days later. 2% phosphotungstic acid was used for negative staining.

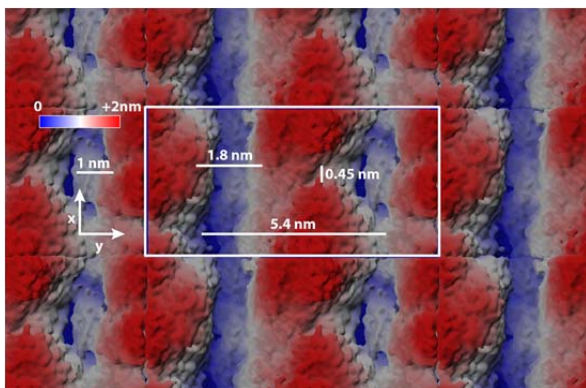

87

88 **Supplementary Figure 9 | Molecular dynamics of a structural model for peptoid**  
 89 **nanomembranes.** Top view of the solvent accessible surface area for the first solvation  
 90 shell water molecules above the membrane averaged over the last 200 ns of the trajectory  
 91 for the membrane structure formed in N=96 simulations of the lipid-like Pep-1 (carboxyl  
 92 side-chains were in the protonated state, and hydrophilic domains formed strips along x-  
 93 direction). The height difference is color coded from blue (0nm) to red (2nm) setting the  
 94 zero to the first solvation shell around the hydrophobic core of the membrane. The white  
 95 rectangle represents the super cell of the simulation.

96  
97

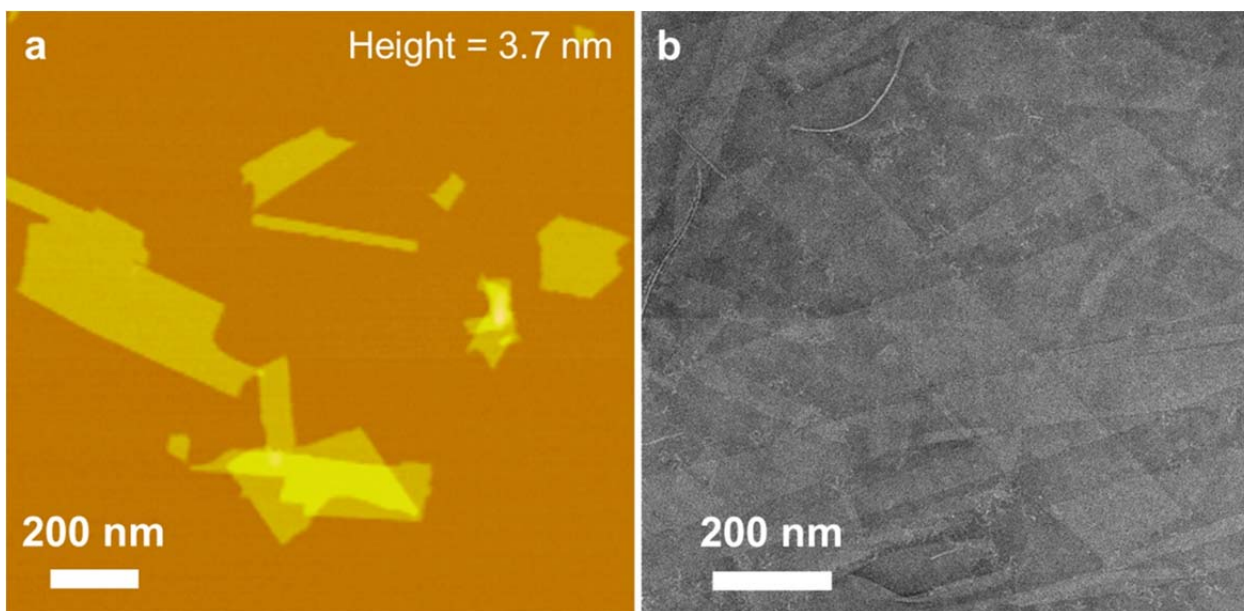

98  
99

100 **Supplementary Figure 10 | Peptoid membranes assembled from 1-Ntyr-Pep-2.** AFM  
 101 (a) and TEM (b) characterizations; 2% phosphotungstic acid was used for negative  
 102 staining.

103  
104



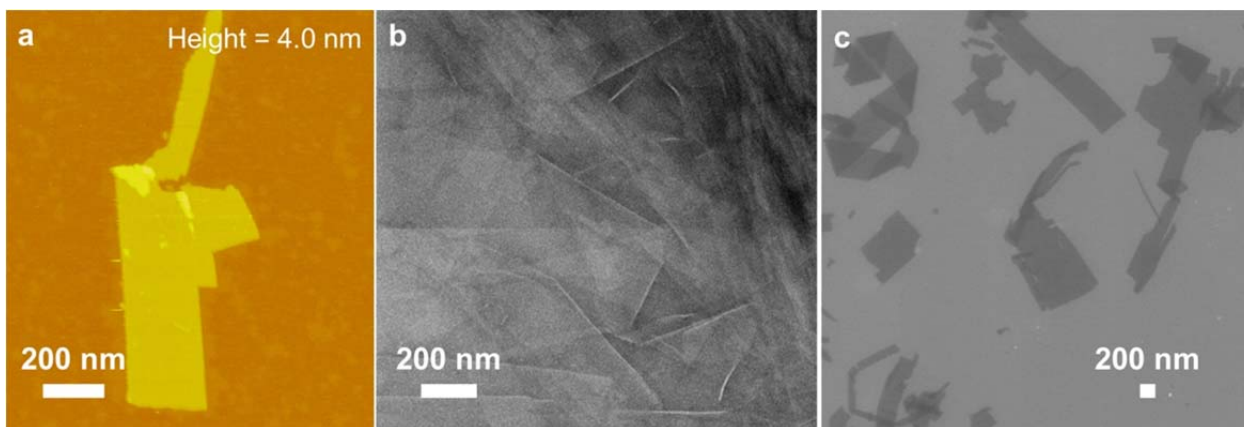

105  
106  
107  
108  
109  
110  
111

**Supplementary Figure 11 | Peptoid membranes assembled from 1-Npyr-Pep-2.** AFM (a), TEM (b), and SEM (c) characterizations.

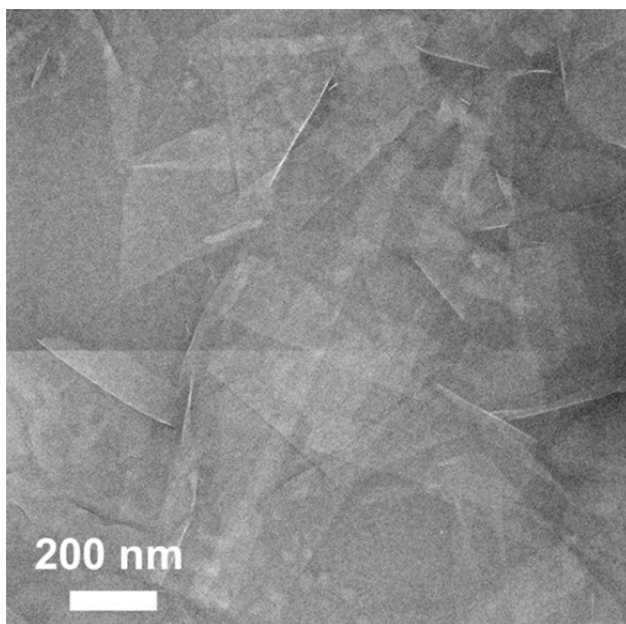

112  
113  
114  
115  
116  
117

**Supplementary Figure 12 | Peptoid membranes assembled from 1-Nhex-Pep-2.** TEM characterization of peptoid membranes; 2% phosphotungstic acid was used for negative staining.

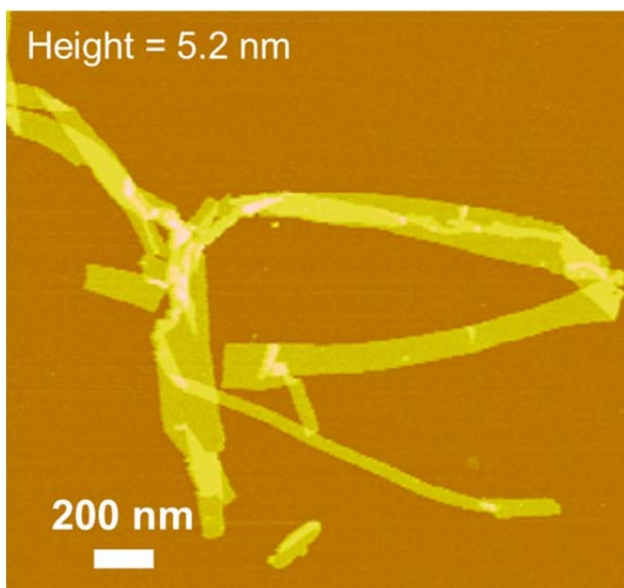

118  
119  
120  
121  
122  
123  
124

**Supplementary Figure 13 | Peptoid membranes assembled from 1,8-(Nazo)<sub>2</sub>-Pep-2.**  
AFM characterization of peptoid membranes.

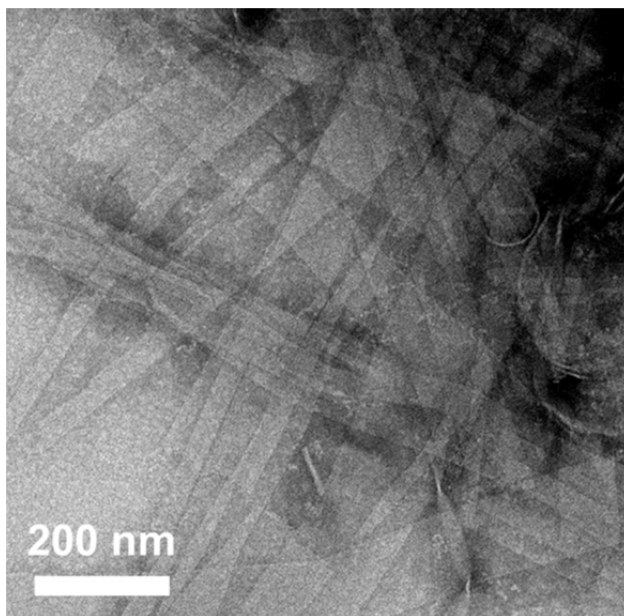

125  
126  
127  
128  
129  
130  
131

**Supplementary Figure 14 | Peptoid membranes assembled from 1,8-(Ntrp)<sub>2</sub>-Pep-2.**  
TEM characterization of peptoid membranes.



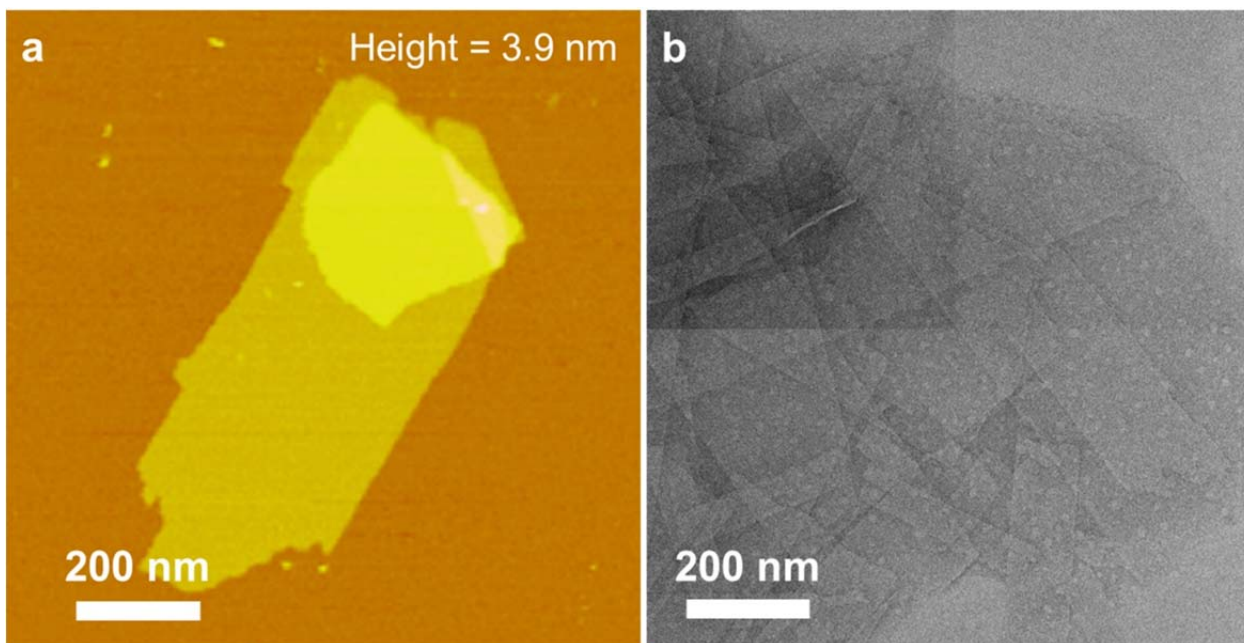

132  
133  
134  
135  
136  
137  
138

**Supplementary Figure 15 | Peptoid membranes assembled from 1,8-(Nse)<sub>2</sub>-Pep-2.**  
AFM (a) and TEM (b) characterizations; 2% phosphotungstic acid was used for negative staining.

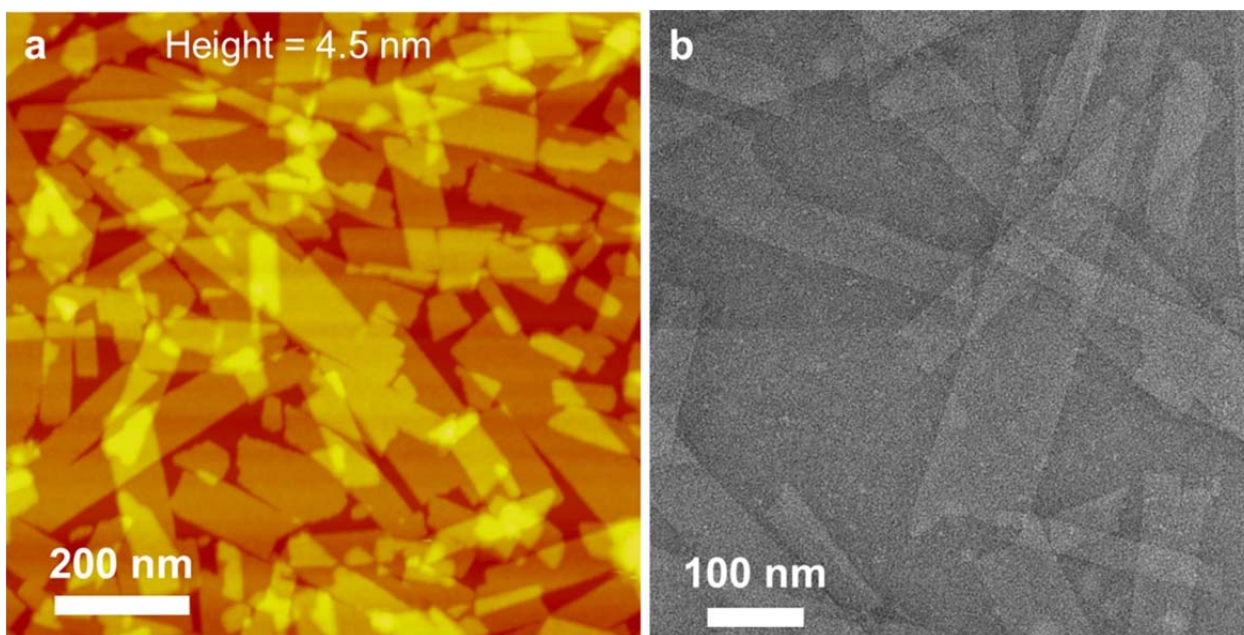

139  
140  
141  
142  
143  
144  
145

**Supplementary Figure 16 | Peptoid membranes assembled from 1,8-(Ntyr)<sub>2</sub>-Pep-2.**  
AFM (a) and TEM (b) characterizations; 2% phosphotungstic acid was used for negative staining.

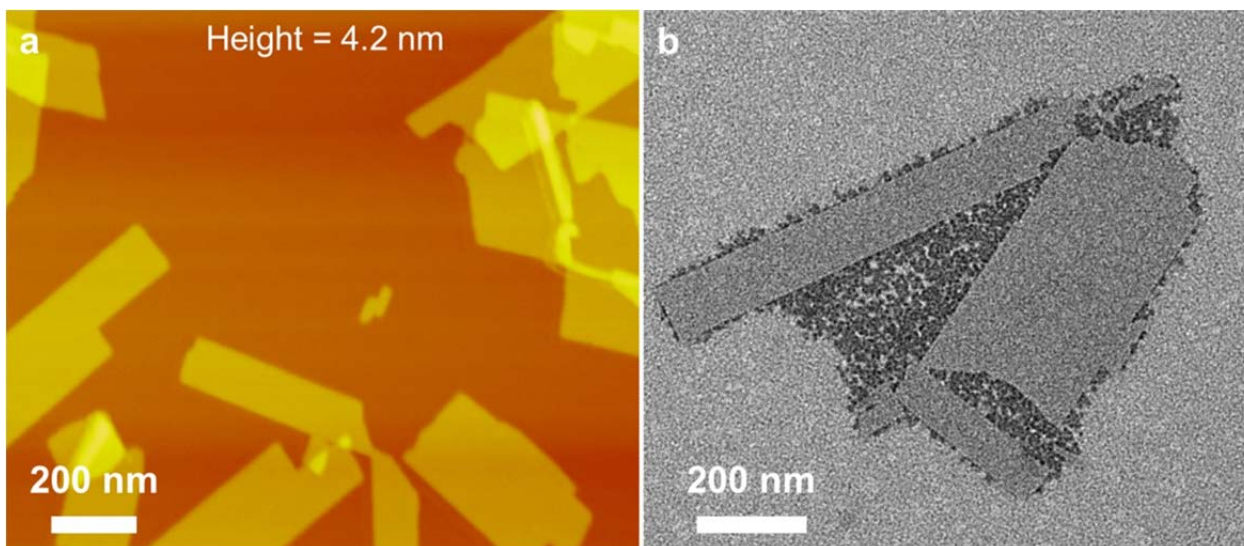

146  
147  
148  
149  
150  
151  
152  
153  
154  
155

**Supplementary Figure 17 | Peptoid membranes assembled from 1-Nse-8-Ntyr-Pep-2.** AFM (a) and TEM (b) characterizations; 2% phosphotungstic acid was used for negative staining.

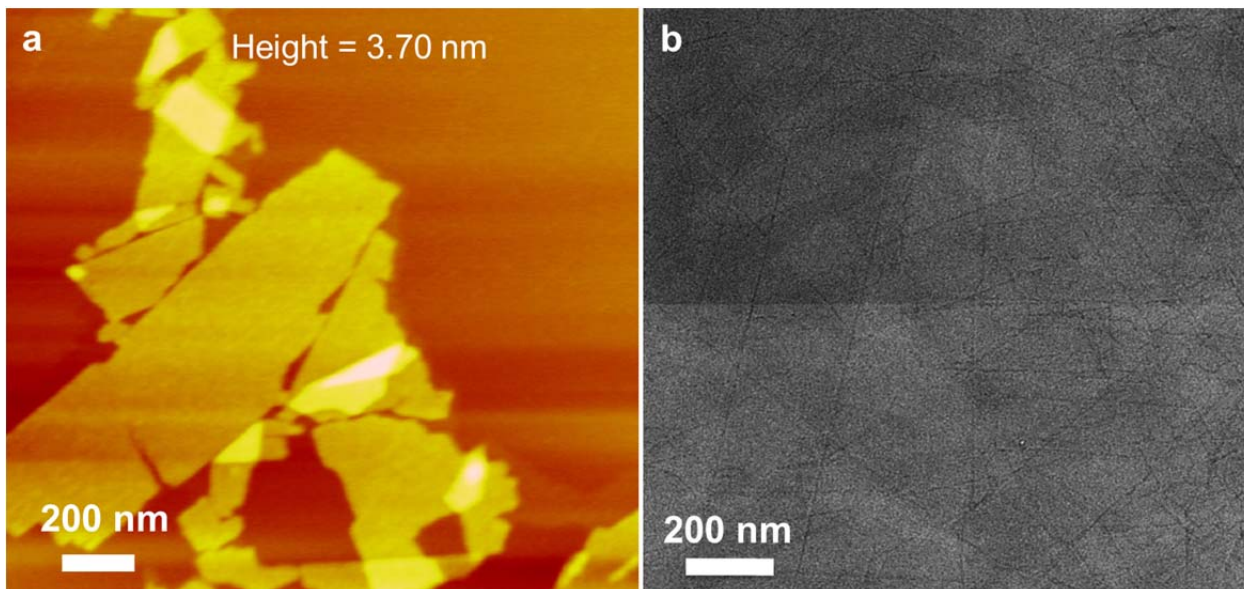

156  
157  
158  
159  
160  
161  
162  
163

**Supplementary Figure 18 | Peptoid membranes assembled from 13-Nte-Pep-2.** AFM (a) and TEM (b) characterizations; 2% phosphotungstic acid was used for negative staining.



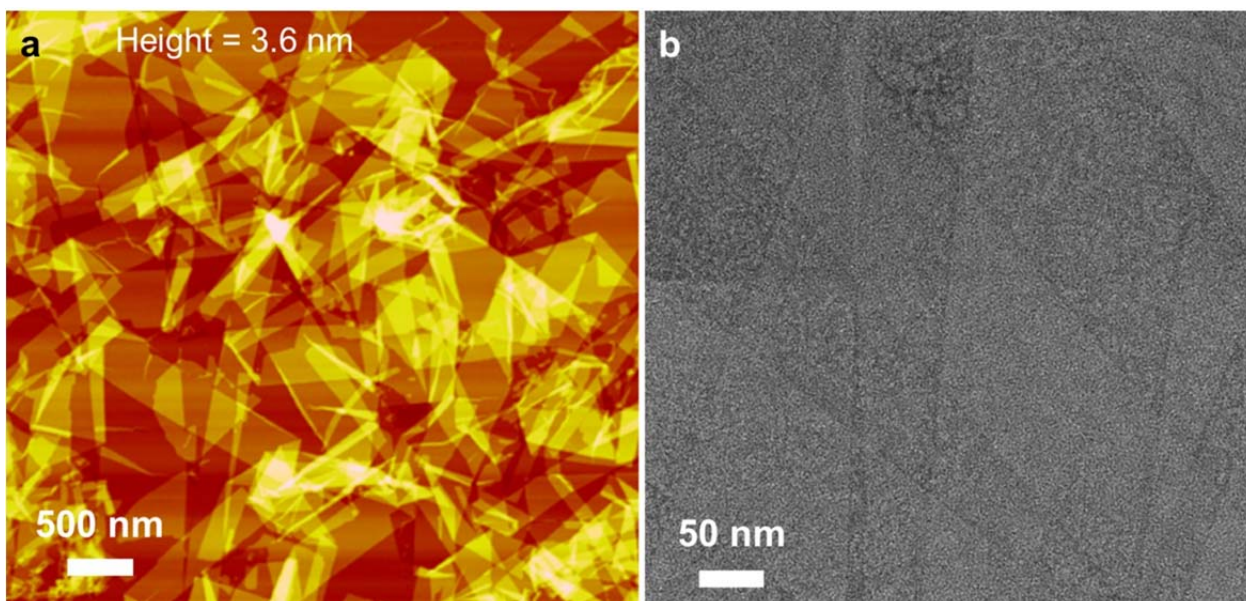

164  
165  
166  
167  
168  
169  
170  
171  
172

**Supplementary Figure 19 | Peptoid membranes assembled from 13-Nhis-Pep-2.**  
AFM (a) and TEM (b) characterizations; 2% phosphotungstic acid was used for negative staining.

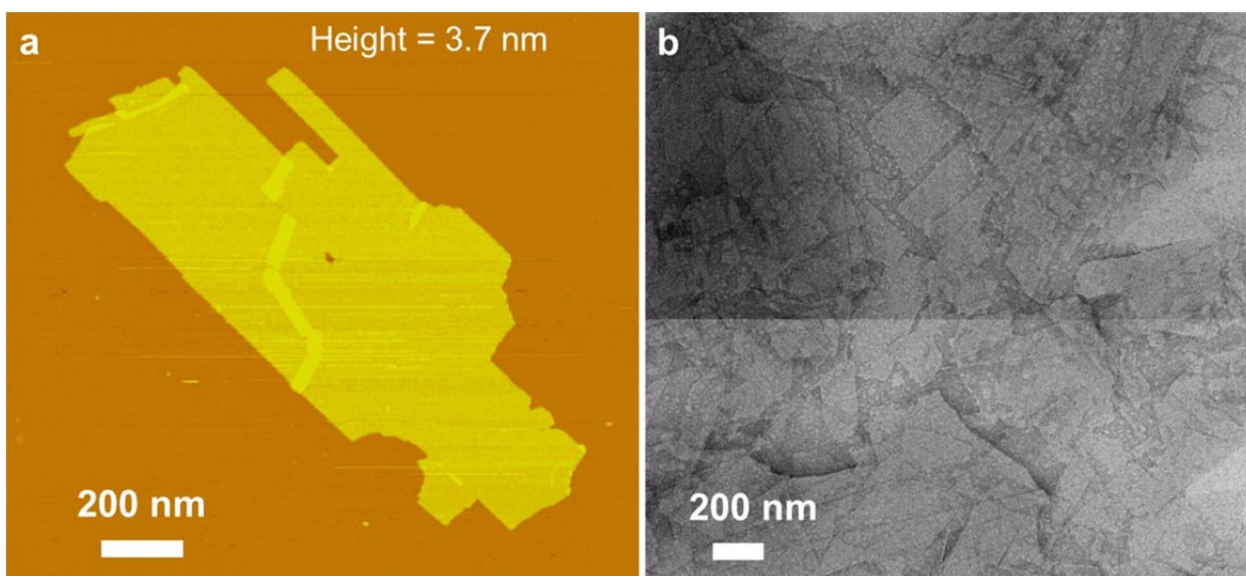

173  
174  
175  
176  
177  
178  
179  
180

**Supplementary Figure 20 | Peptoid membranes assembled from 13-Ntyr-Pep-2.**  
AFM (a) and TEM (b) characterizations; 2% phosphotungstic acid was used for negative staining.

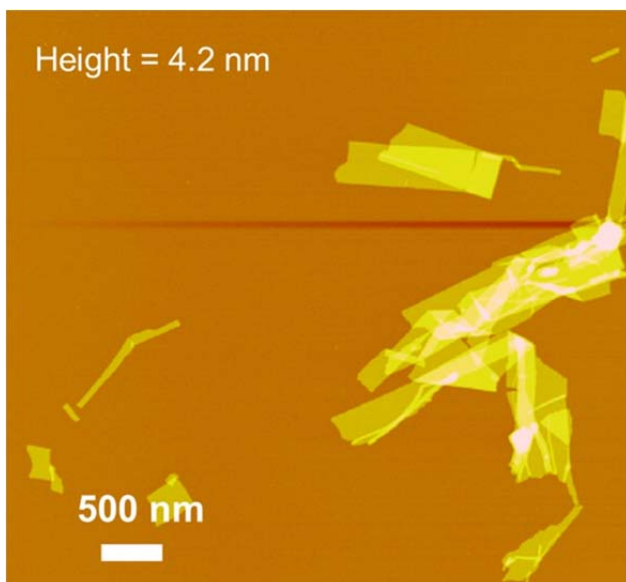

181  
182  
183  
184  
185  
186  
187  
188  
189  
190

**Supplementary Figure 21 | Peptoid membranes assembled from 13-Nbce-Pep-2.**  
AFM characterization of peptoid membranes.

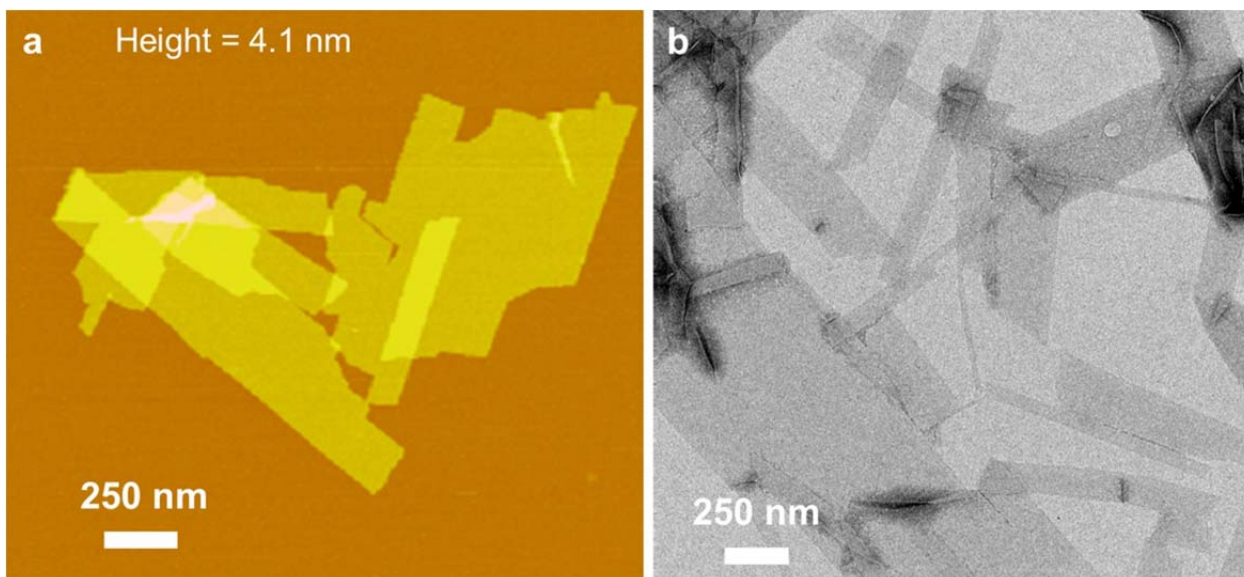

191  
192  
193  
194  
195  
196  
197

**Supplementary Figure 22 | Peptoid membranes assembled from 1,14-(Nse)<sub>2</sub>-Pep-2.**  
AFM (a) and TEM (b) characterizations; 2% phosphotungstic acid was used for negative staining.



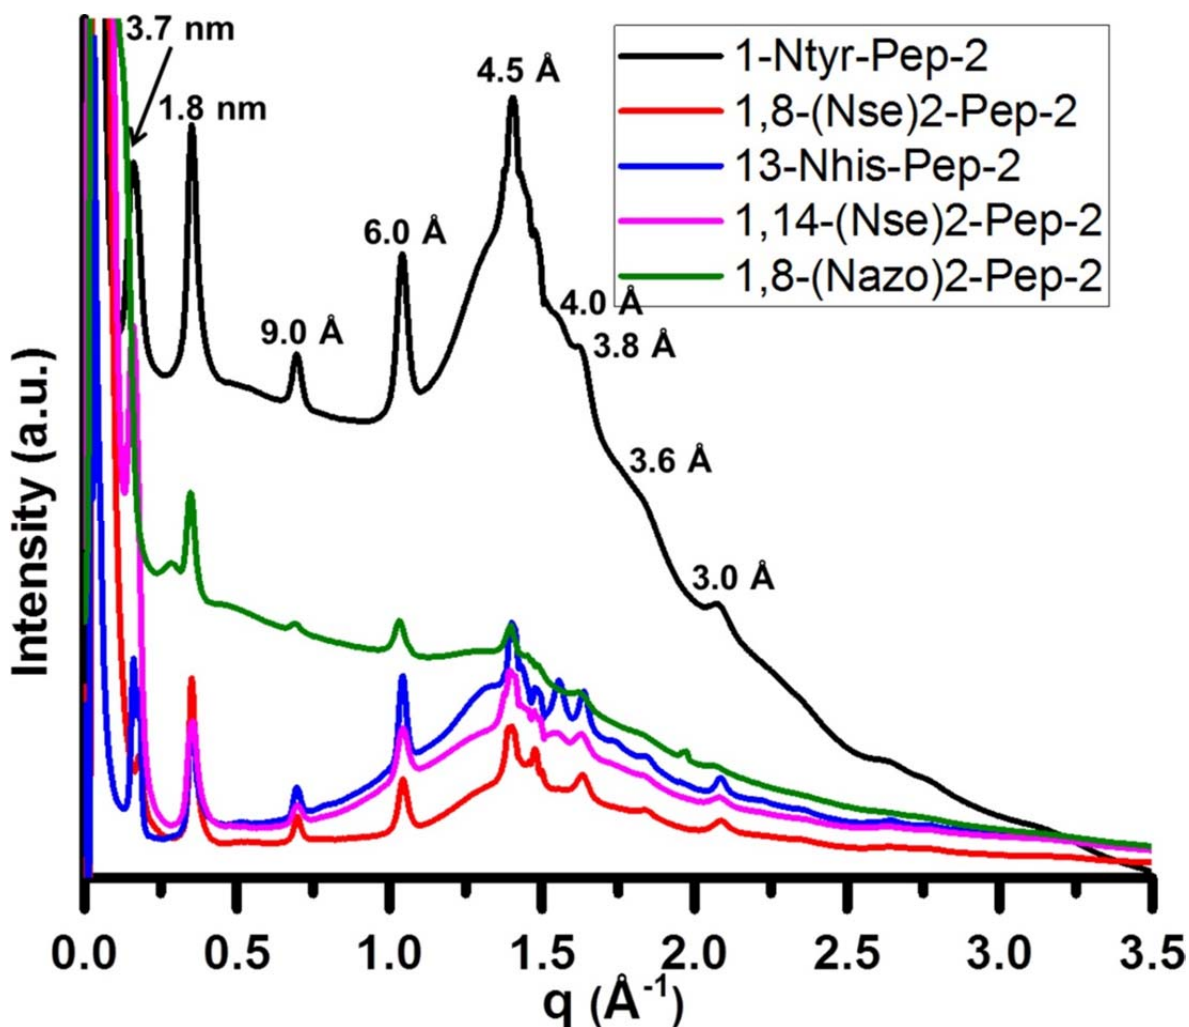

198  
 199  
 200  
 201  
 202  
 203  
 204  
 205  
 206  
 207  
 208  
 209  
 210  
 211  
 212  
 213  
 214  
 215  
 216  
 217

**Supplementary Figure 23 | Peptoids with functional objects assembled into biomimetic membranes with similar structures.** XRD data of membranes assembled from 1-Ntyr-Pep-2, 1,8-(Nse)<sub>2</sub>-Pep-2, 13-Nhis-Pep-2, 1,14-(Nse)<sub>2</sub>-Pep-2, and 1,8-(Nazo)<sub>2</sub>-Pep-2; they all exhibit similar XRD patterns to those of Pep-2, showing structural similarity.

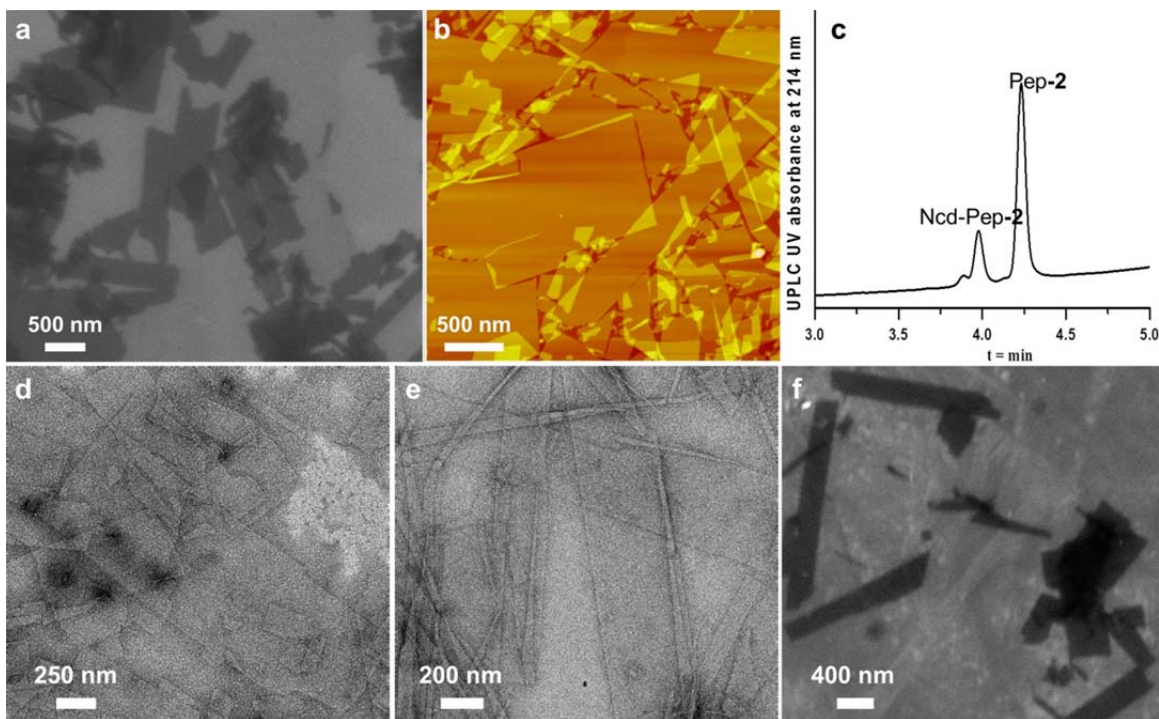

218  
 219  
 220  
 221  
 222  
 223  
 224  
 225  
 226  
 227  
 228  
 229  
 230  
 231  
 232  
 233  
 234  
 235  
 236  
 237  
 238  
 239  
 240  
 241  
 242  
 243  
 244  
 245

**Supplementary Figure 24 | Incorporating functional objects through co-crystallization.** **a**, A SEM image showing 2D membranes co-assembled from **Pep-2** and **Ncd-Pep-2** with molar ratio 4:1. **b**, An AFM image showing the co-assembled membranes. **c**, UPLC data showing the co-assembled membranes from **Ncd-Pep-2** & **Pep-2** have the molar ratio of **Ncd-Pep-2** vs **Pep-2** is almost 1 : 4 (integration of UPLC peaks). **d**, A TEM image showing 2D membranes co-assembled from **Pep-2** and **Ncd-Pep-2** with molar ratio 9:1. **e**, A TEM image showing 2D membranes co-assembled from **Pep-2** and **Ncd-Pep-2** with molar ratio 1:1. **f**, A SEM image showing 2D membranes co-assembled from **Pep-2** and **Ncd-Pep-2** with molar ratio 1:1.

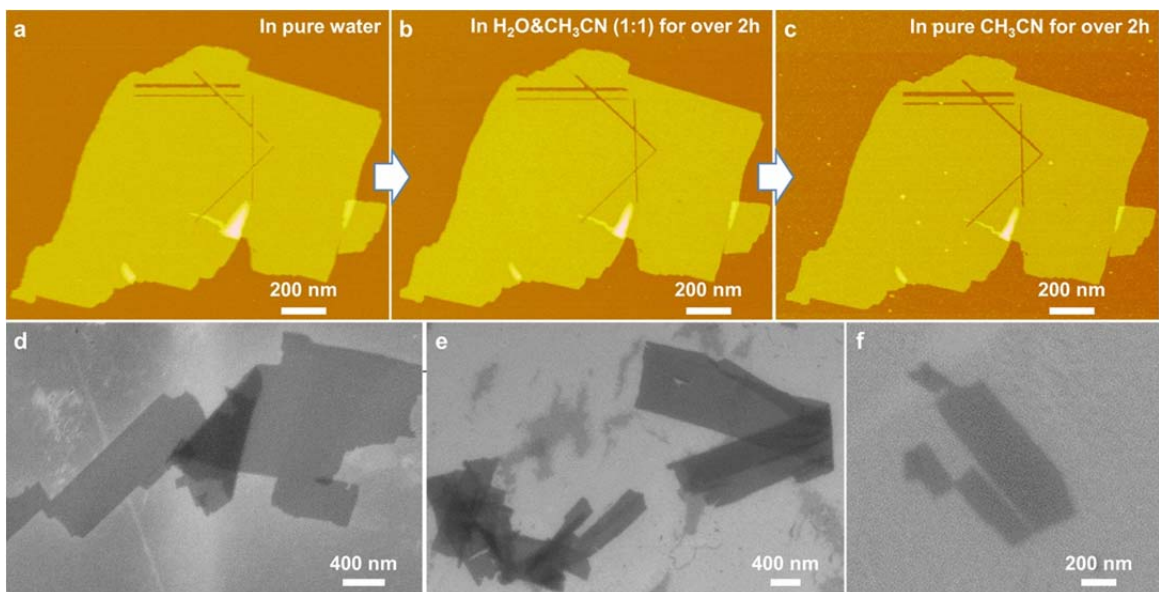

246  
247  
248  
249  
250  
251  
252  
253  
254  
255  
256  
257  
258

**Supplementary Figure 25 | Peptoid membranes are highly stable.** **a**, An *in situ* AFM image of one Pep-3 membrane in pure water, some defects were purposely introduced using mechanical forces for membrane self-repair experiments. **b**, An *in situ* AFM images show that no significant disruptions were observed when peptoid membranes were incubated in H<sub>2</sub>O&CH<sub>3</sub>CN (1:1) solution for over 2h. **c**, An *in situ* AFM image show the peptoid membrane is stable even in pure CH<sub>3</sub>CN for over 2h. **d**, A SEM image of **Pep-2** membranes which were incubated in pure CH<sub>3</sub>CN for over 6h. **e**, A SEM image showing peptoid membranes co-assembled from **Pep-2** and Ncd-**Pep-2** with molar ratio 1:1, these membranes were incubated in pure CH<sub>3</sub>CN for over 6h before SEM experiment. **f**, A SEM image showing the 1-Npyr-**Pep-2** membranes after they were incubated in pure CH<sub>3</sub>CN for over 6h.

259  
260

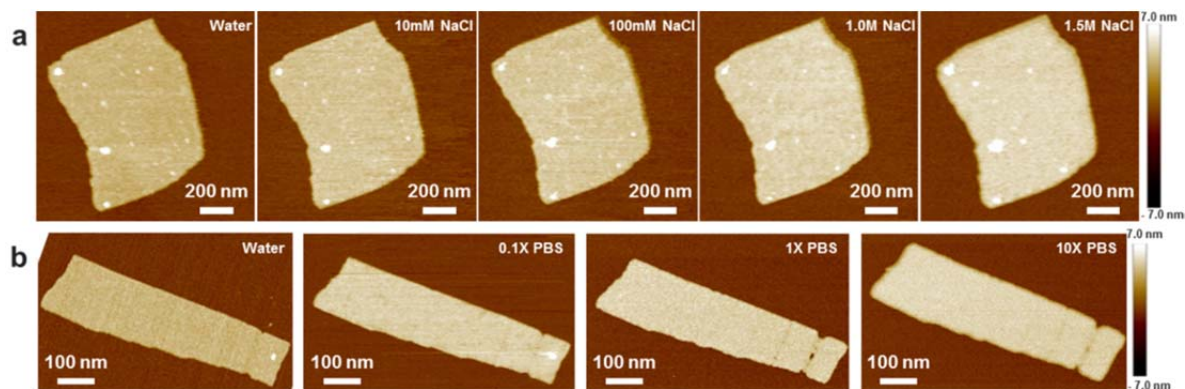

261  
262  
263  
264  
265  
266  
267

**Supplementary Figure 26 | Salt-induced thickness changes of peptoid membranes.** **a**, *In situ* AFM image of one Pep-3 membrane in pure water, 10 mM NaCl, 100 mM NaCl, 1.0M NaCl and 1.5 M NaCl showing membrane thickness change. **b**, *In situ* AFM image of one Pep-3 membrane in pure water, 0.1x PBS, 1x PBS and 10x PBS buffer showing membrane thickness change.



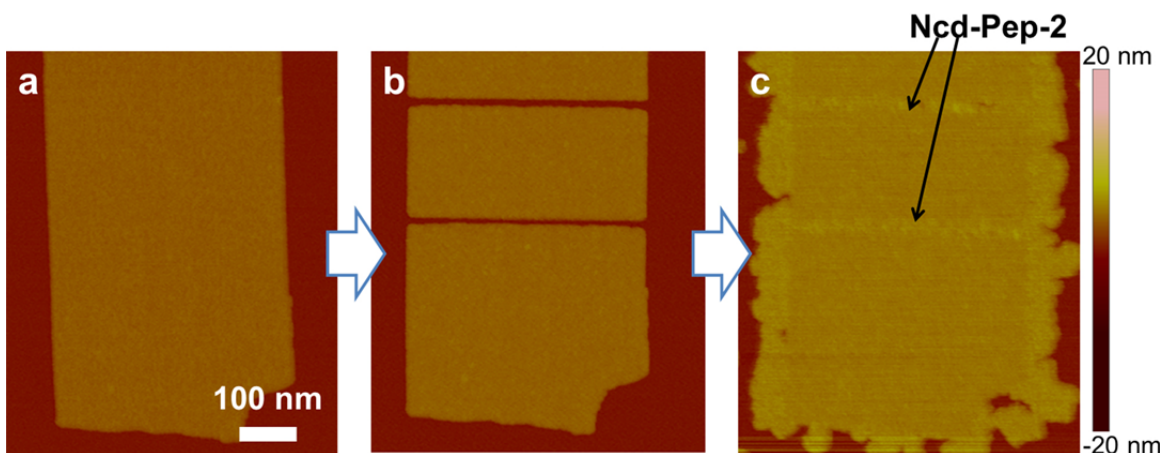

268

269 **Supplementary Figure 27 | The nanoscale patterning of Ncd-Pep-2 within Pep-2**  
 270 **membranes. a,** An *In situ* AFM image showing one Pep-2 membrane in water. **b,** An *In*  
 271 *situ* AFM image showing one Pep-2 membrane with mechanically-induced defects. **c,** An  
 272 *In situ* AFM image showing the nanoscale patterning of Ncd-Pep-2 within Pep-2  
 273 membrane.

274

275

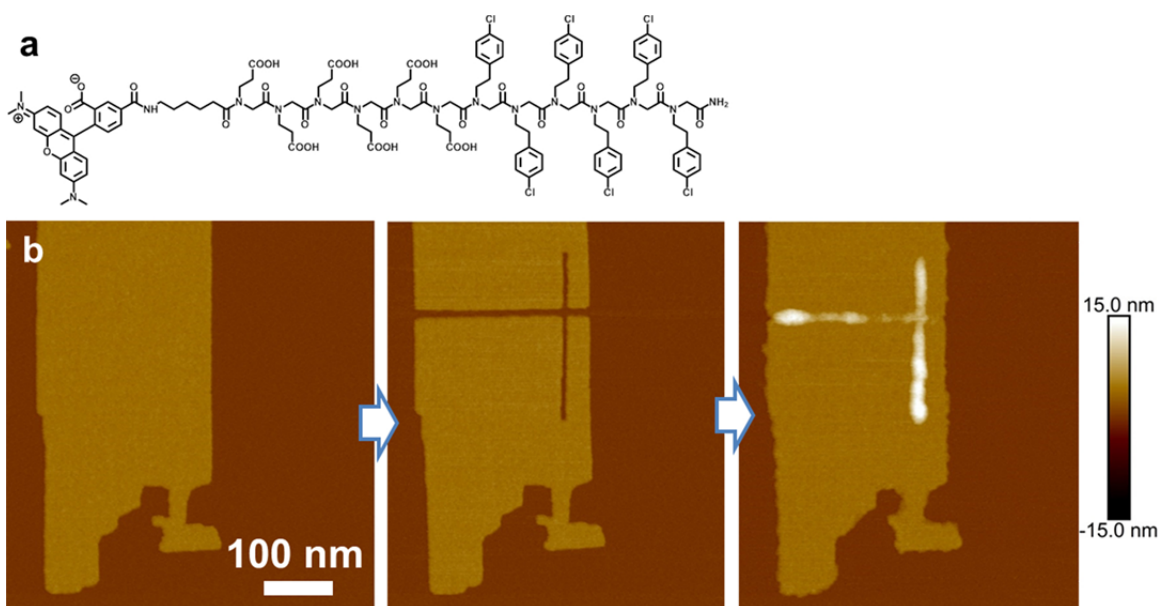

276

277 **Supplementary Figure 28 | The nanoscale patterning of NHS-Rhodamine-labeled**  
 278 **Pep-3 within Pep-3 membranes. a,** Structure of NHS-Rhodamine-labeled Pep-3. **b,** The  
 279 nanoscale patterning of NHS-Rhodamine-Pep-3 within Pep-3 membranes; (left) An *In*  
 280 *situ* AFM image showing one Pep-2 membrane in water; (middle) An *In situ* AFM image  
 281 showing one Pep-3 membrane with mechanically-induced defects; (right) An *In situ*  
 282 AFM image showing the nanoscale patterning of NHS-Rhodamine-Pep-3 within Pep-3  
 283 membrane.



284  
285  
286  
287  
288  
289

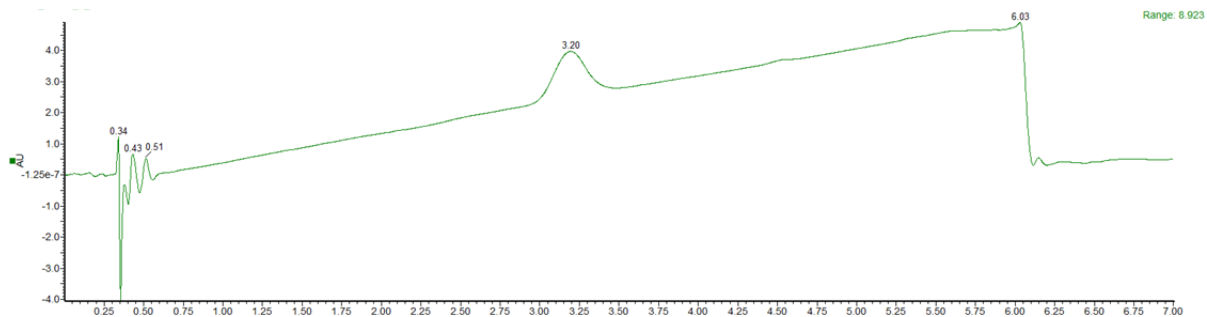

290  
291

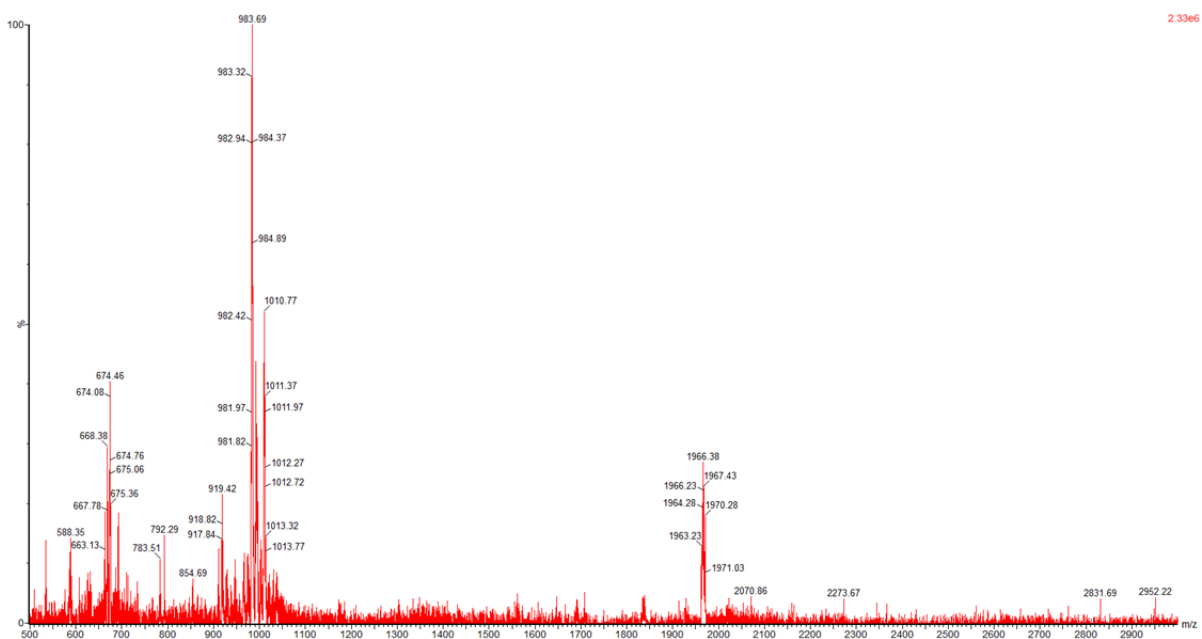

292  
293  
294  
295  
296  
297  
298  
299  
300  
301  
302  
303

**Supplementary Figure 29 | UPLC-MS characterization of Pep-1.** (Top image) UPLC characterization of Pep-1 with the gradient of 40 - 80% CH<sub>3</sub>CN in H<sub>2</sub>O. (Bottom image) MS characterization of Pep-1.

304  
305  
306

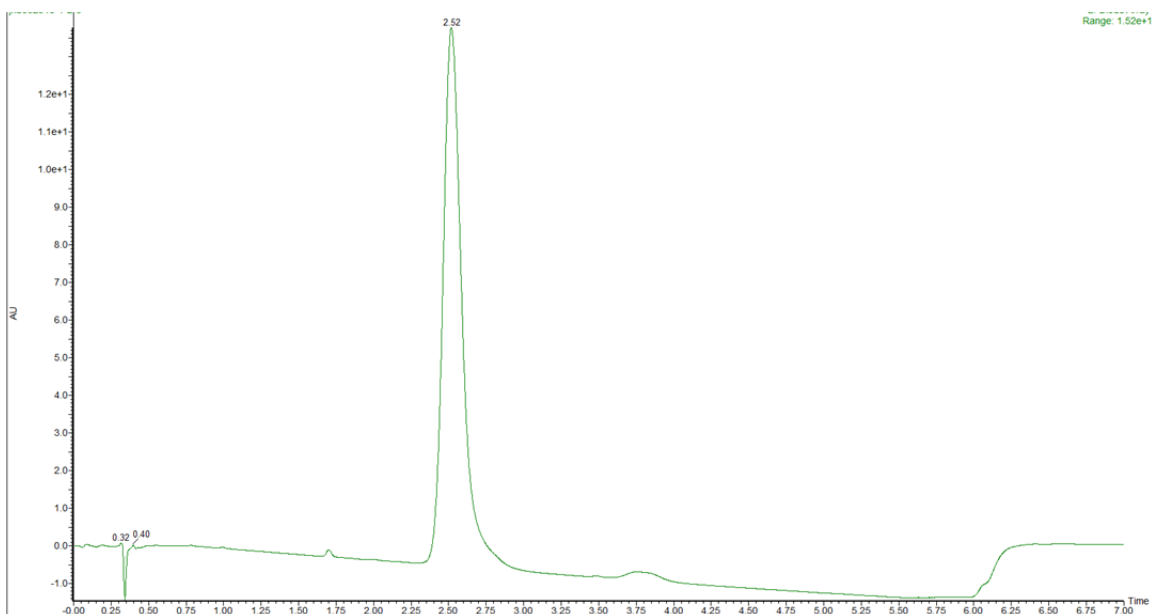

307  
308

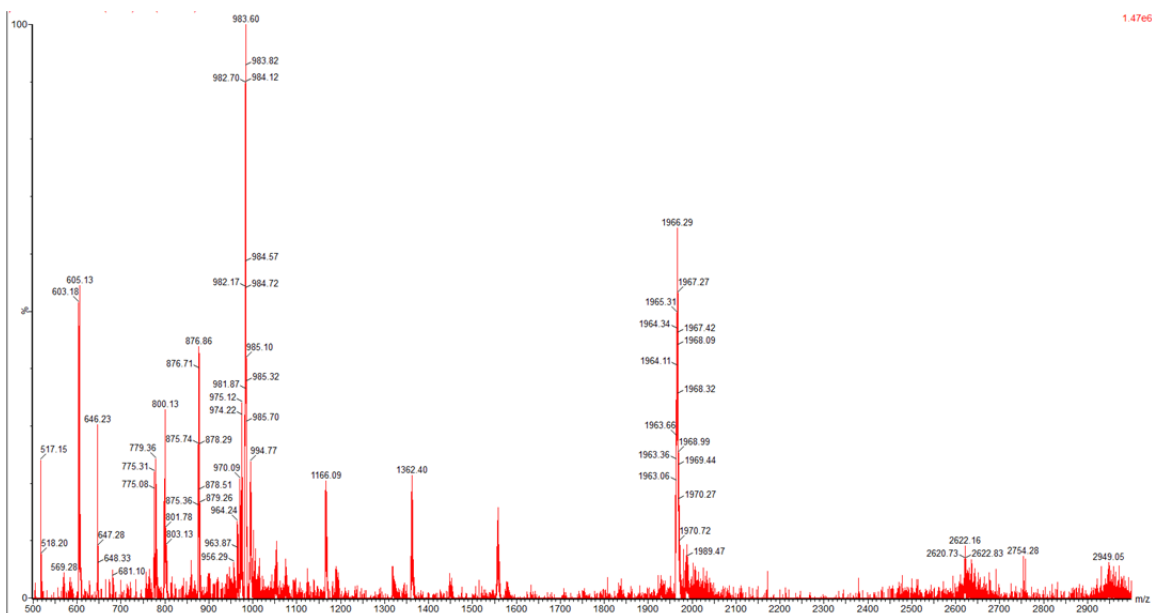

309  
310  
311  
312  
313  
314  
315  
316  
317  
318

**Supplementary Figure 30 | UPLC-MS characterization of Pep-2.** (Top image) UPLC characterization of Pep-2 with the gradient of 55 - 75% CH<sub>3</sub>CN in H<sub>2</sub>O. (Bottom image) MS characterization of Pep-2.

319  
320  
321

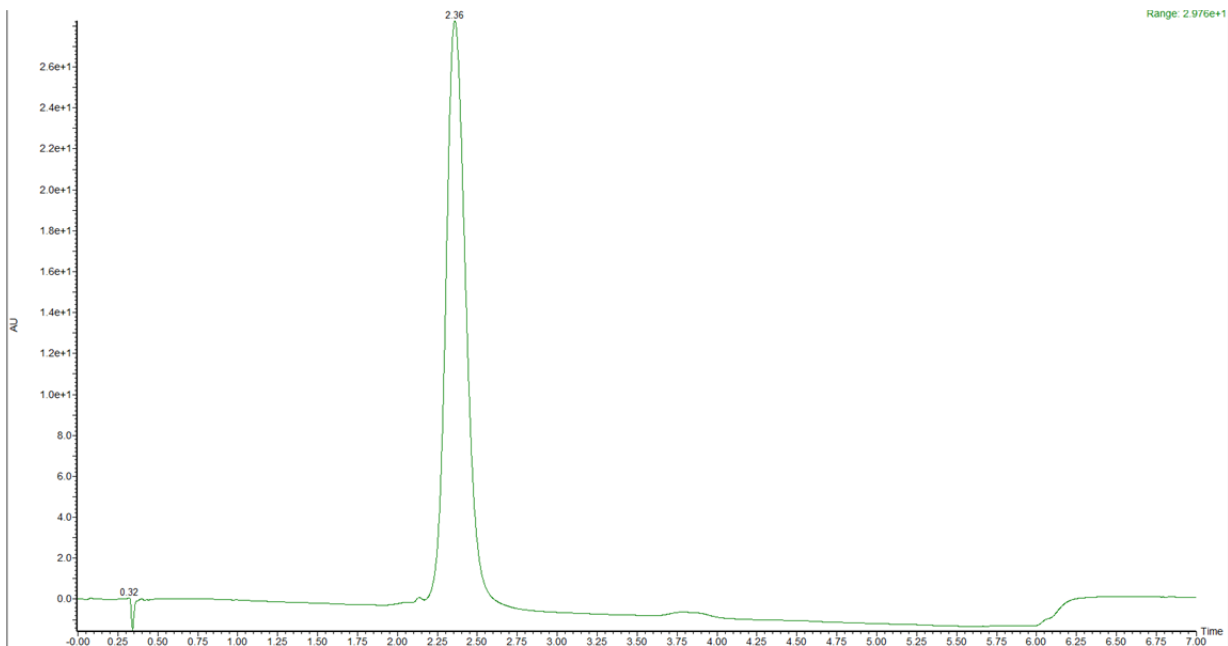

322  
323

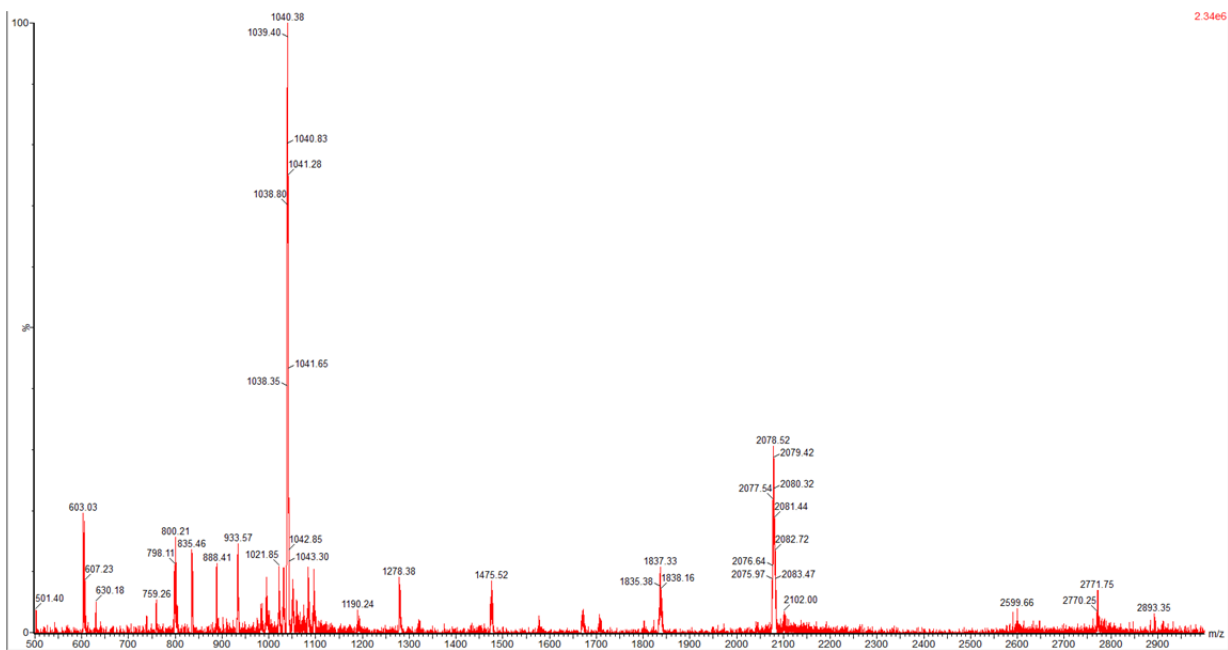

324  
325  
326  
327  
328  
329  
330  
331  
332

**Supplementary Figure 31 | UPLC-MS characterization of Pep-3.** (Top image) UPLC characterization of Pep-3 with the gradient of 55 - 75% CH<sub>3</sub>CN in H<sub>2</sub>O. (Bottom image) MS characterization of Pep-3.

333  
334  
335  
336  
337  
338  
339

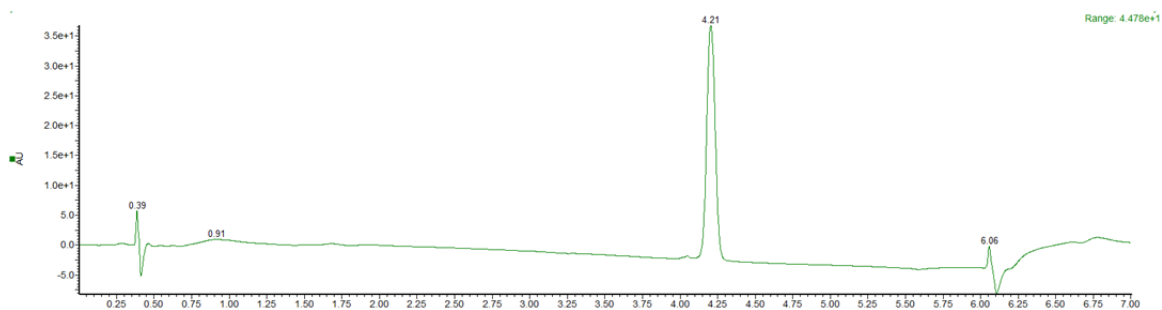

340  
341  
342

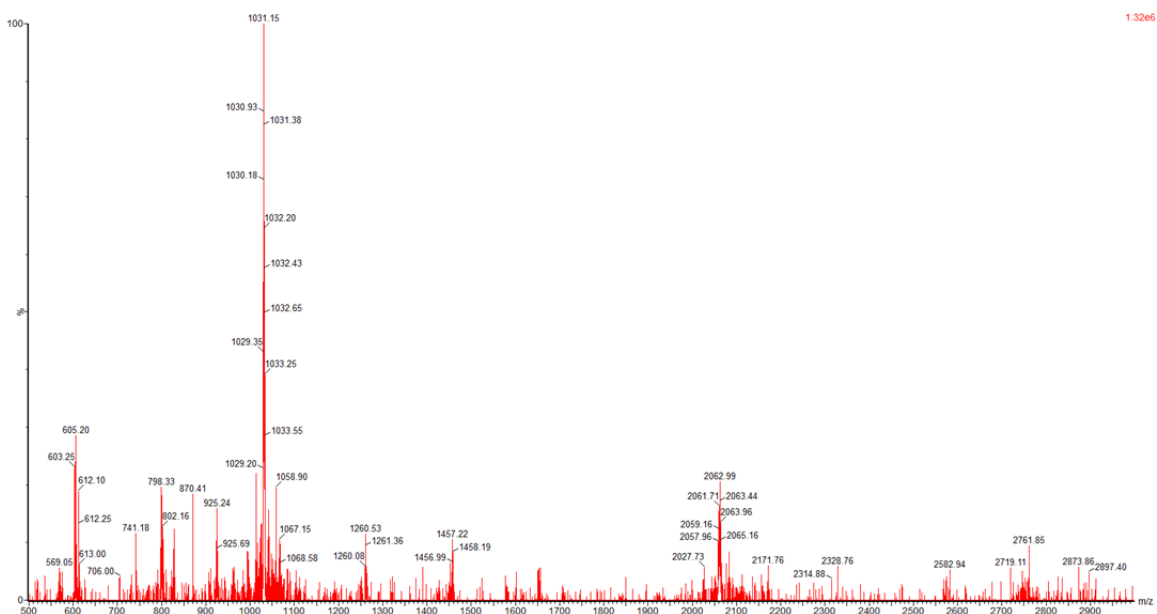

343  
344  
345  
346  
347  
348  
349  
350  
351  
352  
353  
354  
355  
356

**Supplementary Figure 32 | UPLC-MS characterization of Pep-4.** (Top image) UPLC characterization of Pep-4 with the gradient of 5 - 95% CH<sub>3</sub>CN in H<sub>2</sub>O. (Bottom image) MS characterization of Pep-4.



357  
358  
359  
360  
361  
362

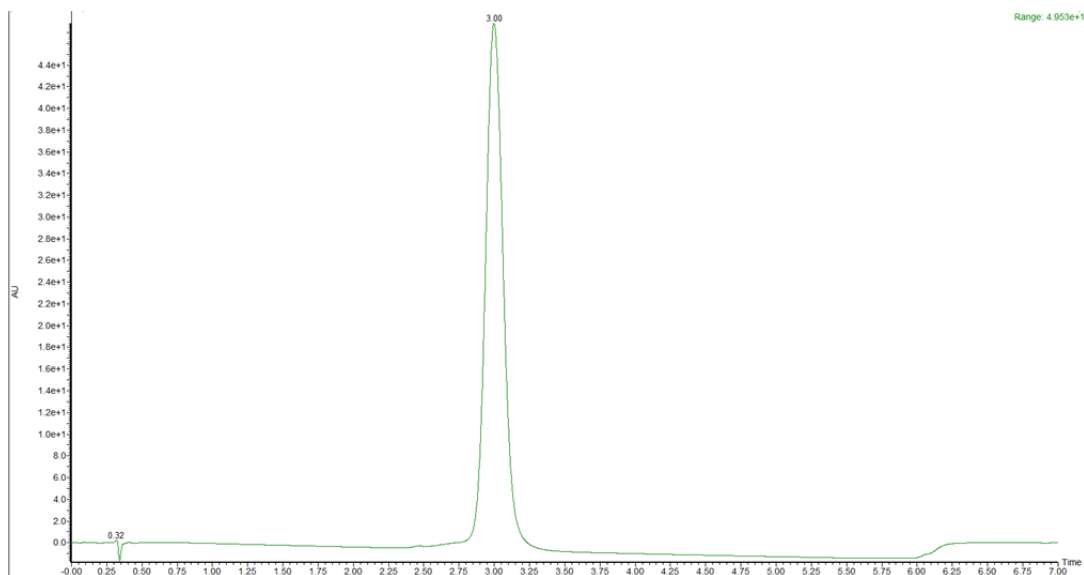

363  
364  
365

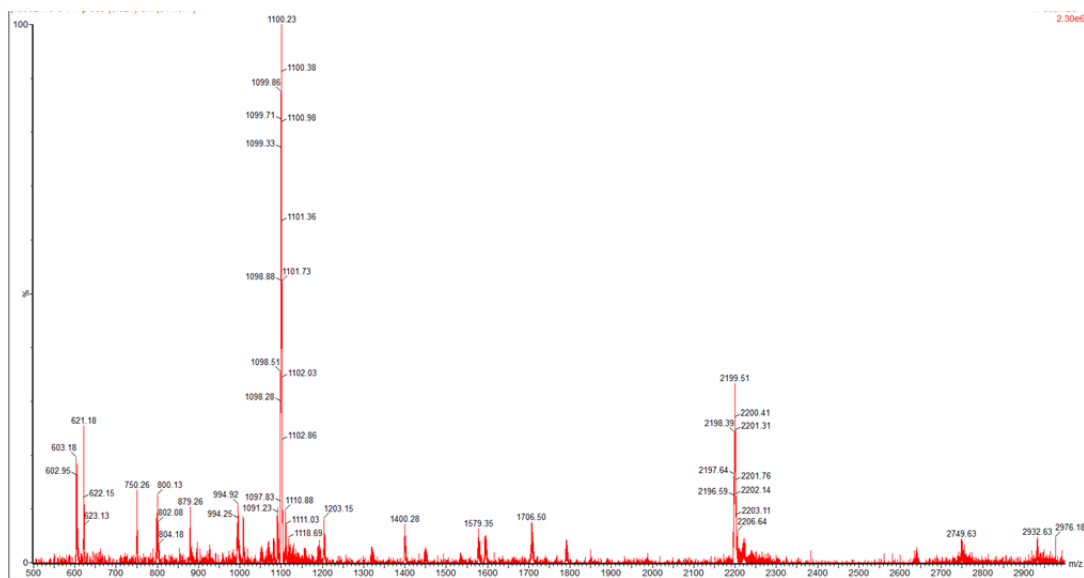

366  
367  
368  
369  
370  
371  
372  
373  
374

**Supplementary Figure 33 | UPLC-MS characterization of Pep-5.** (Top image) UPLC characterization of Pep-5 with the gradient of 40 - 80% CH<sub>3</sub>CN in H<sub>2</sub>O. (Bottom image) MS characterization of Pep-5.



392  
393  
394

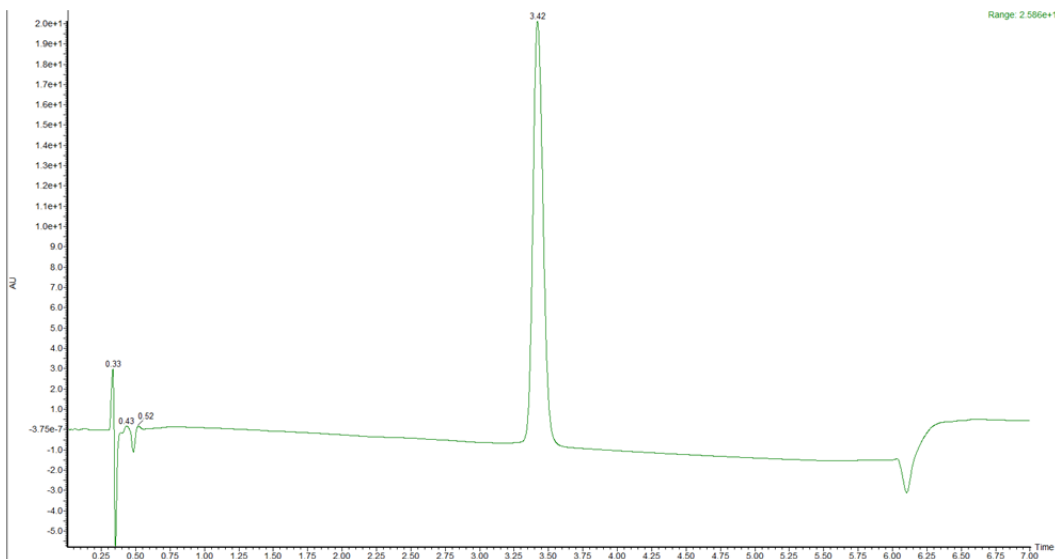

395  
396  
397

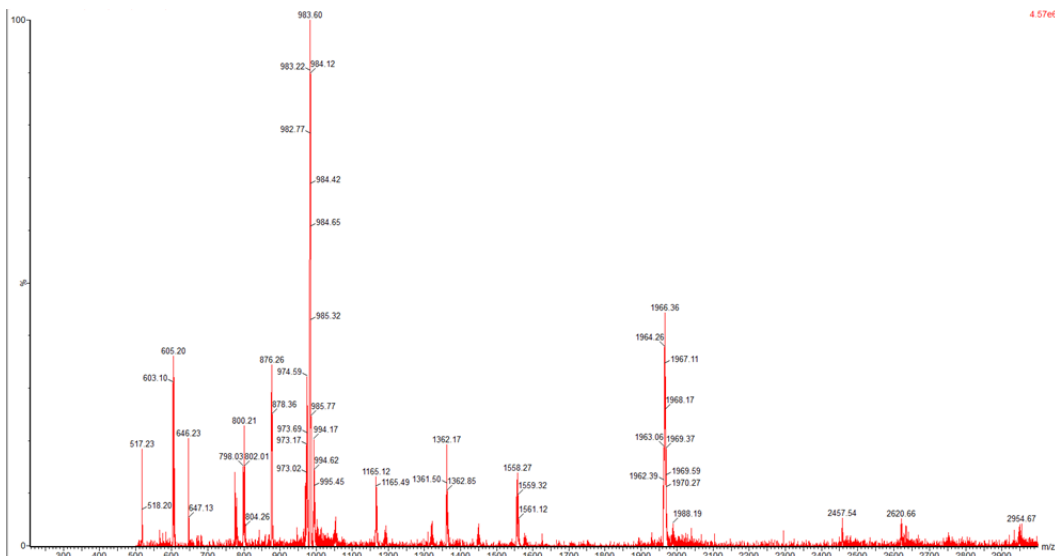

398  
399

400 **Supplementary Figure 35 | UPLC-MS characterization of Pep-7.** (Top image) UPLC  
401 characterization of Pep-7 with the gradient of 40 - 80% CH<sub>3</sub>CN in H<sub>2</sub>O. (Bottom image)  
402 MS characterization of Pep-7.

403  
404  
405  
406  
407  
408  
409

410  
411  
412  
413

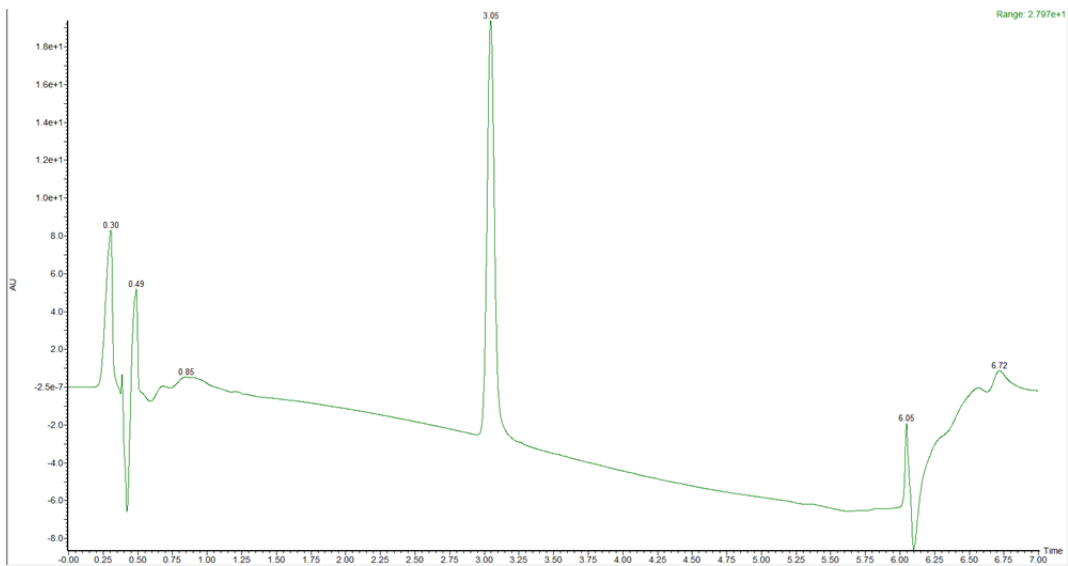

414  
415  
416  
417

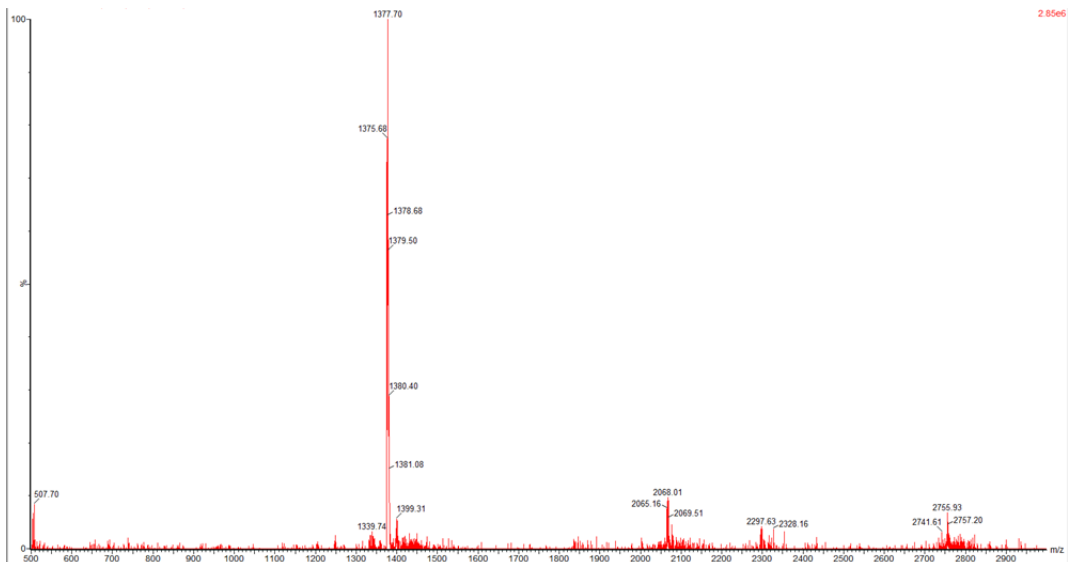

418  
419  
420  
421  
422  
423  
424  
425  
426  
427

**Supplementary Figure 36 | UPLC-MS characterization of Pep-8.** (Top image) UPLC characterization of Pep-8 with the gradient of 5 - 95% CH<sub>3</sub>CN in H<sub>2</sub>O. (Bottom image) MS characterization of Pep-8.



428  
429  
430  
431  
432

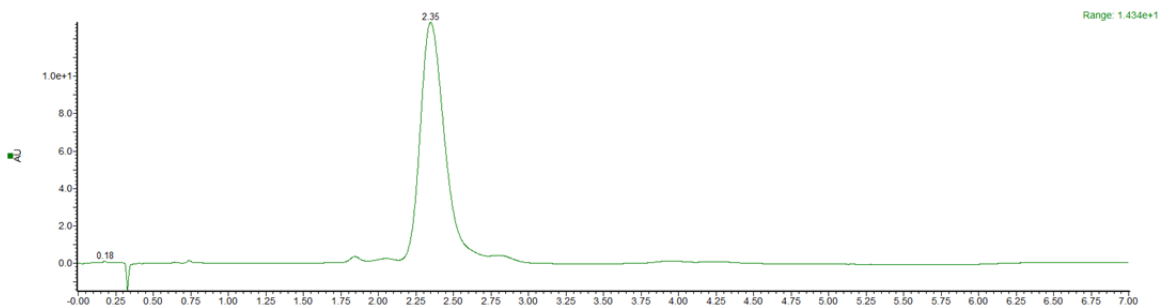

433  
434  
435

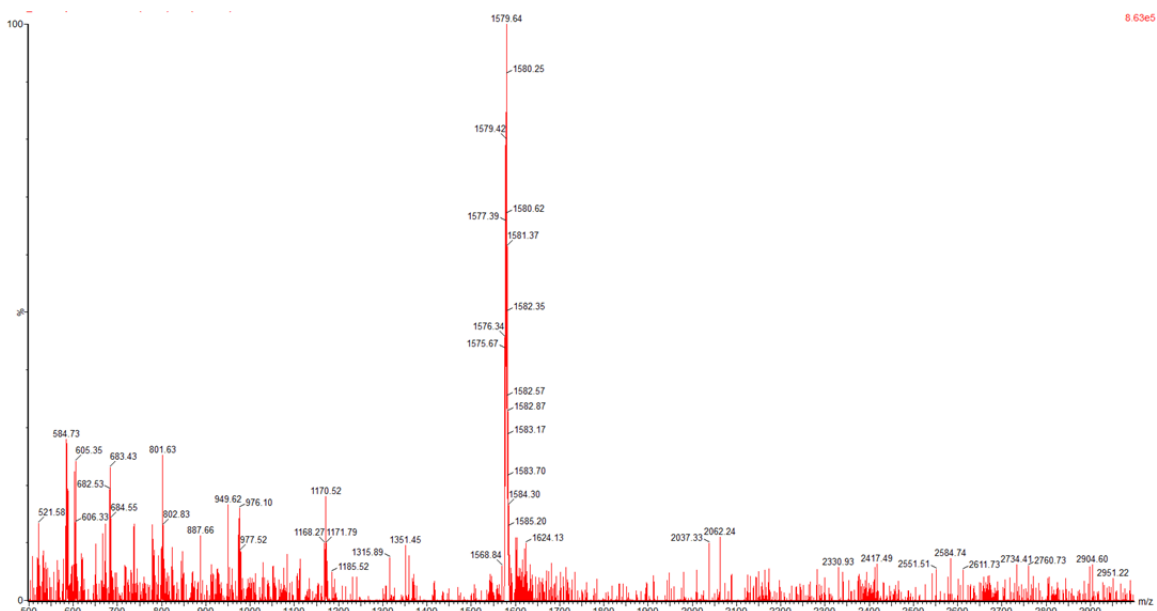

436  
437  
438  
439  
440  
441  
442  
443

**Supplementary Figure 37 | UPLC-MS characterization of Pep-9.** (Top image) UPLC characterization of Pep-9 with the gradient of 60 - 65% CH<sub>3</sub>CN in H<sub>2</sub>O. (Bottom image) MS characterization of Pep-9.



456

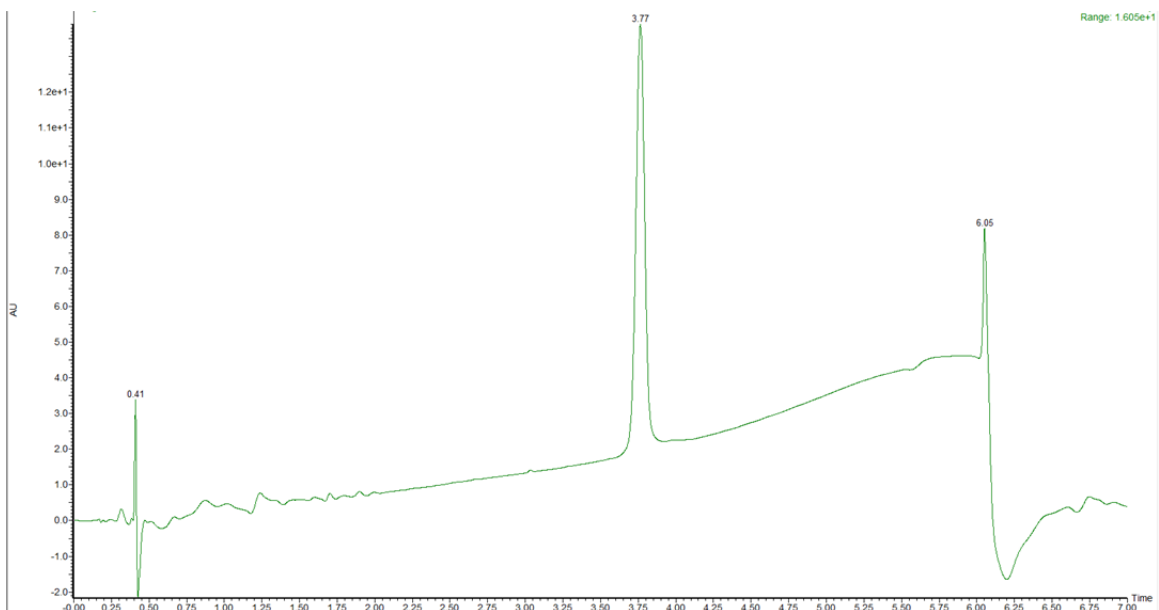

457  
458

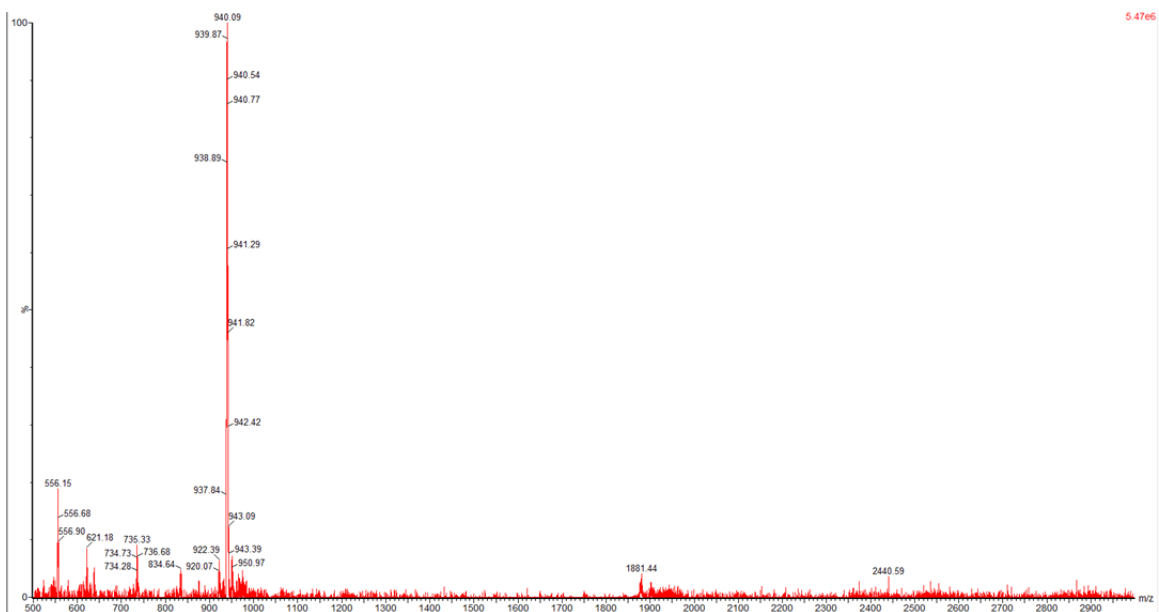

459  
460  
461  
462  
463  
464

**Supplementary Figure 39 | UPLC-MS characterization of Pep-11.** (Top image) UPLC characterization of Pep-11 with the gradient of 45 - 65% CH<sub>3</sub>CN in H<sub>2</sub>O. (Bottom image) MS characterization of Pep-11.

465

466

467

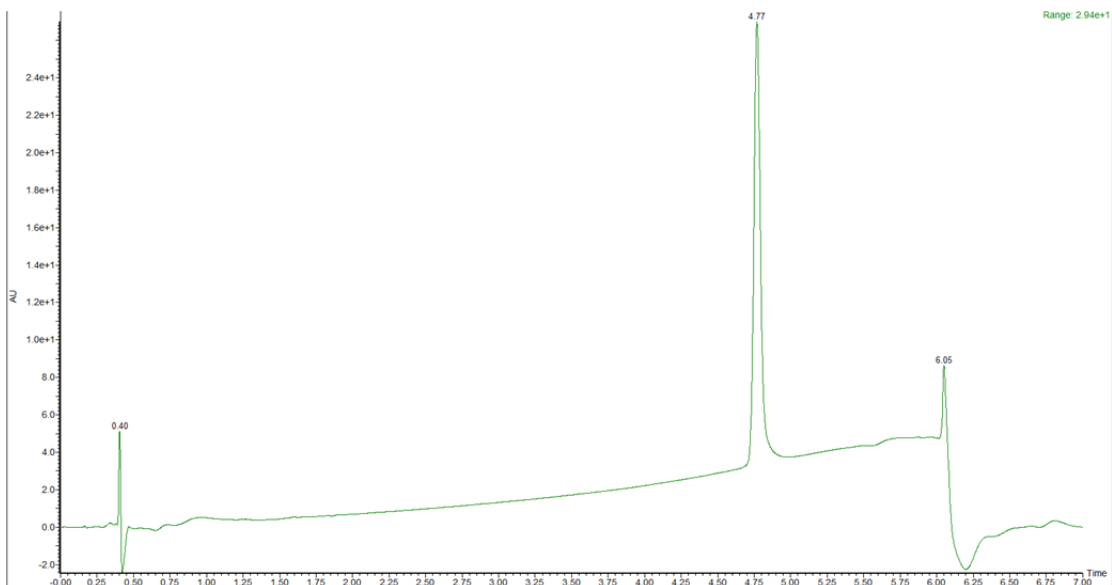

468  
469

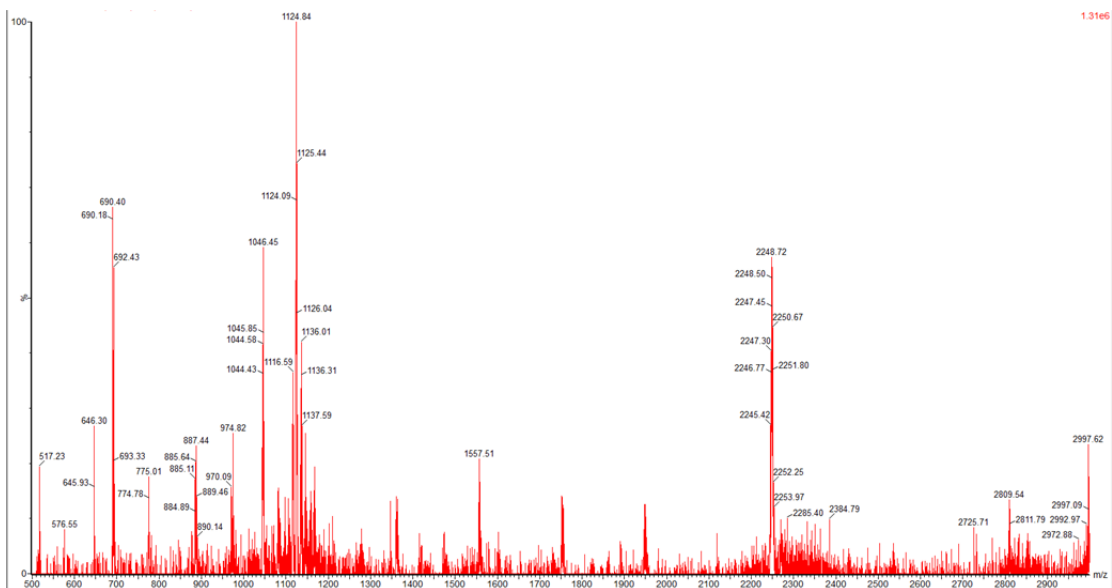

470  
471

472 **Supplementary Figure 40 | UPLC-MS characterization of Pep-12.** (Top image) UPLC  
473 characterization of Pep-12 with the gradient of 5 - 95% CH<sub>3</sub>CN in H<sub>2</sub>O. (Bottom image)  
474 MS characterization of Pep-12.  
475

476

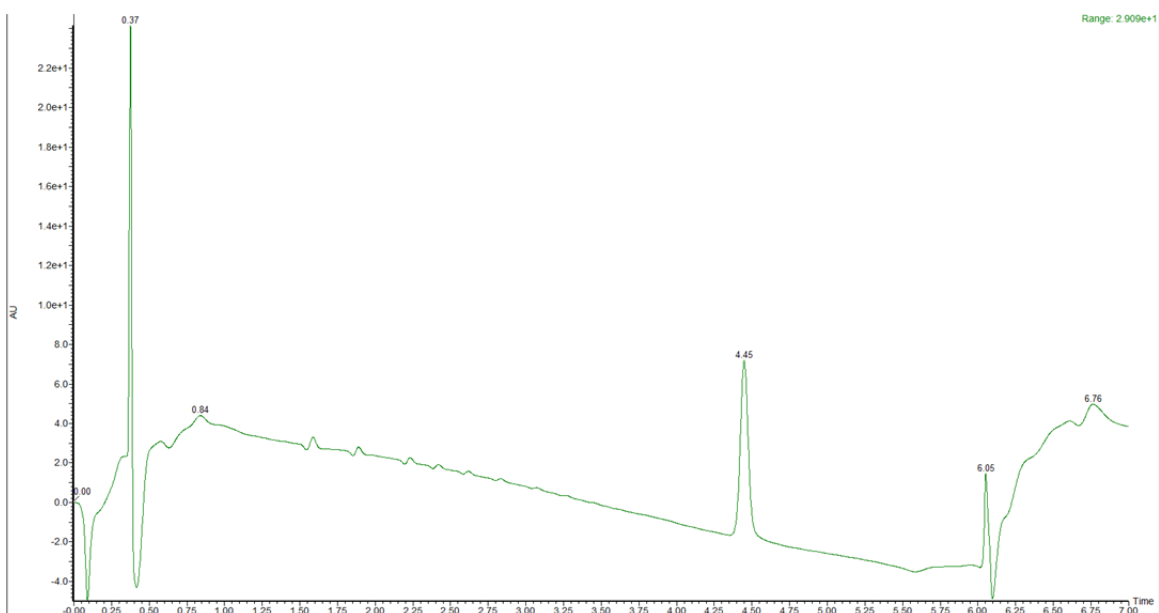

477  
478

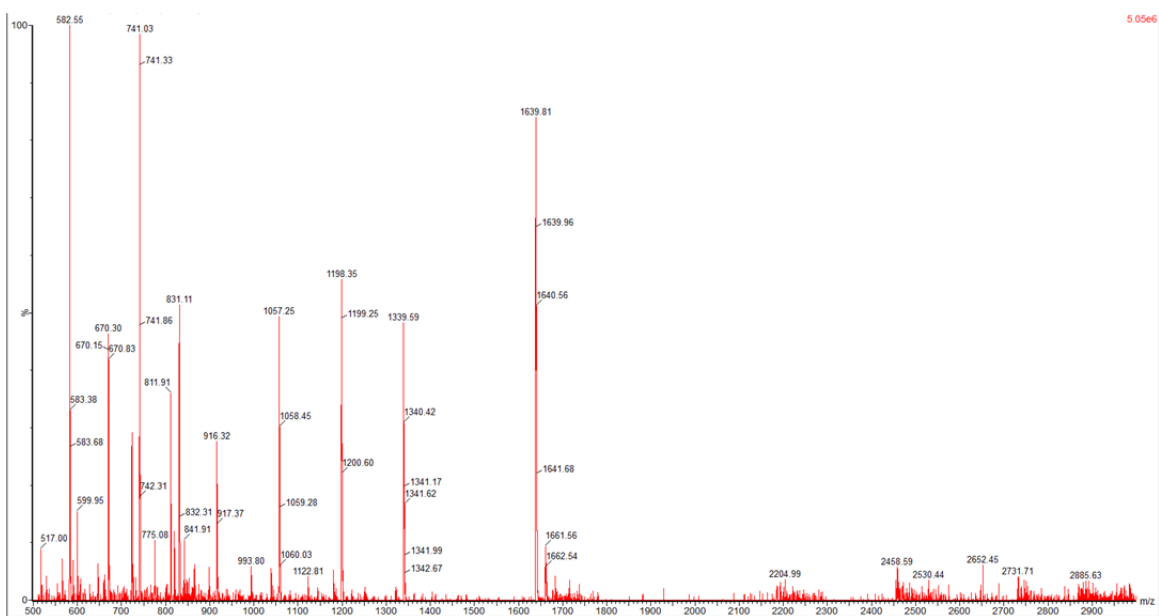

479  
480

481 **Supplementary Figure 41 | UPLC-MS characterization of Pep-13.** (Top image) UPLC  
482 characterization of Pep-13 with the gradient of 5 - 95% CH<sub>3</sub>CN in H<sub>2</sub>O. (Bottom image)  
483 MS characterization of Pep-13.

484  
485



486

487

488

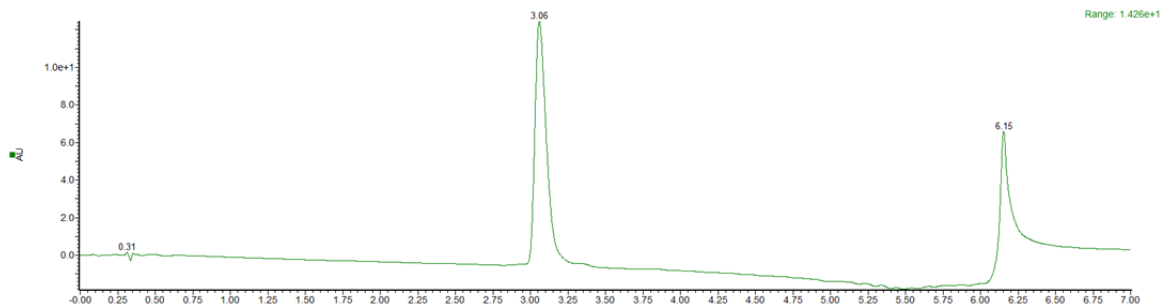

489

490

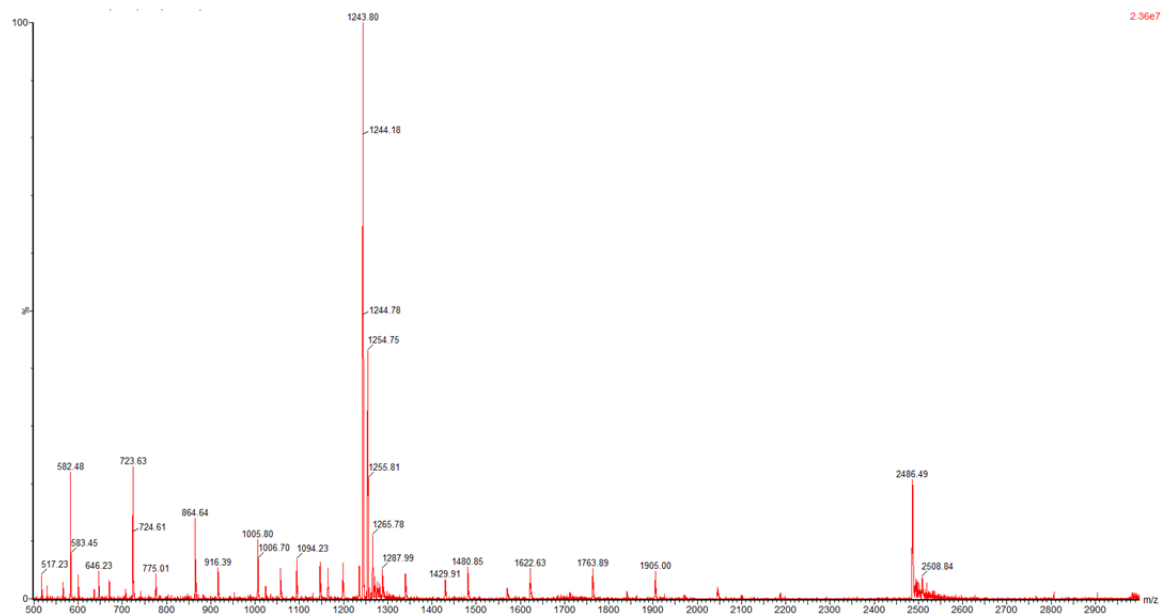

491

492

**Supplementary Figure 42 | UPLC-MS characterization of Pep-14.** (Top image) UPLC characterization of Pep-14 with the gradient of 80 - 100% CH<sub>3</sub>CN in H<sub>2</sub>O. (Bottom image) MS characterization of Pep-14.

496

497

498

499

500

501

502

503

504

505

506

507  
508

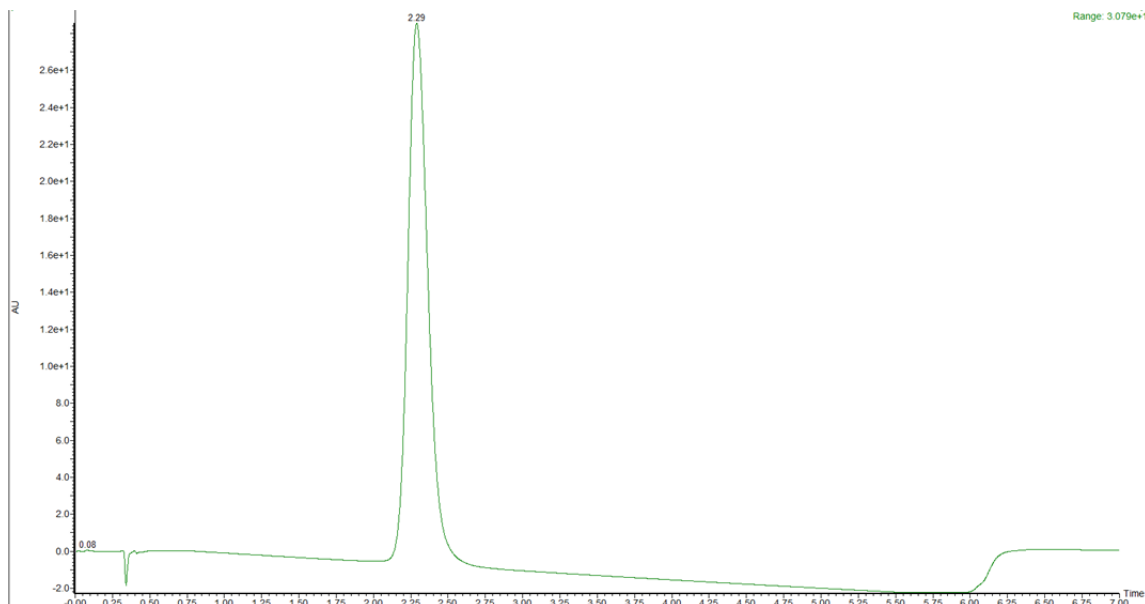

509  
510

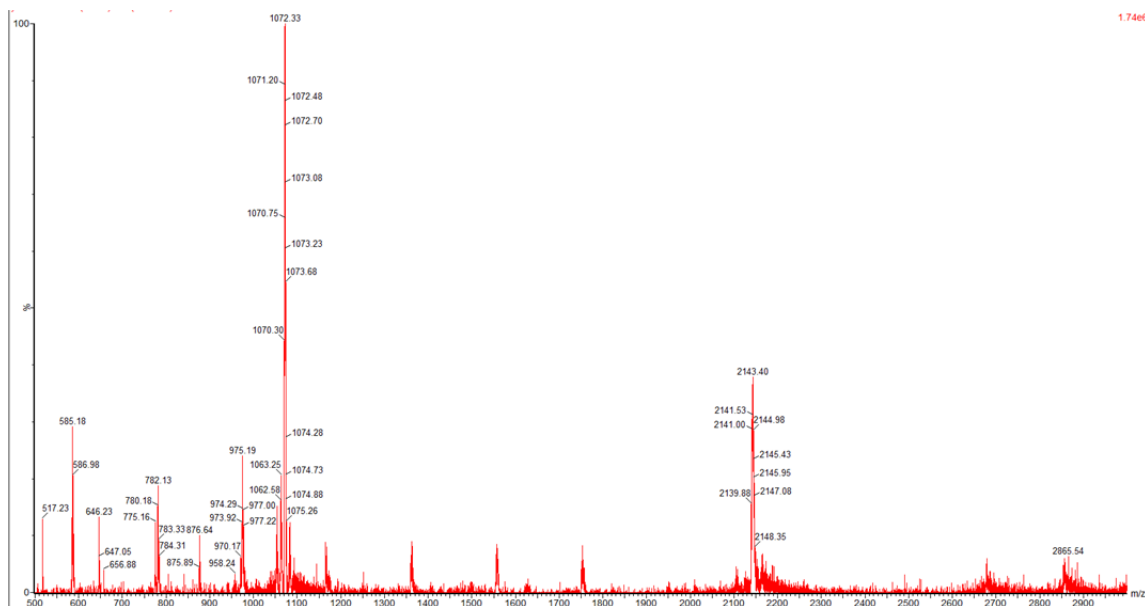

511  
512  
513  
514  
515  
516  
517  
518  
519  
520  
521  
522

**Supplementary Figure 43 | UPLC-MS characterization of 1-Ntyr-Pep-2.** (Top image) UPLC characterization of 1-Ntyr-Pep-2 with the gradient of 55 - 75% CH<sub>3</sub>CN in H<sub>2</sub>O. (Bottom image) MS characterization of 1-Ntyr-Pep-2.

523  
524  
525  
526  
527

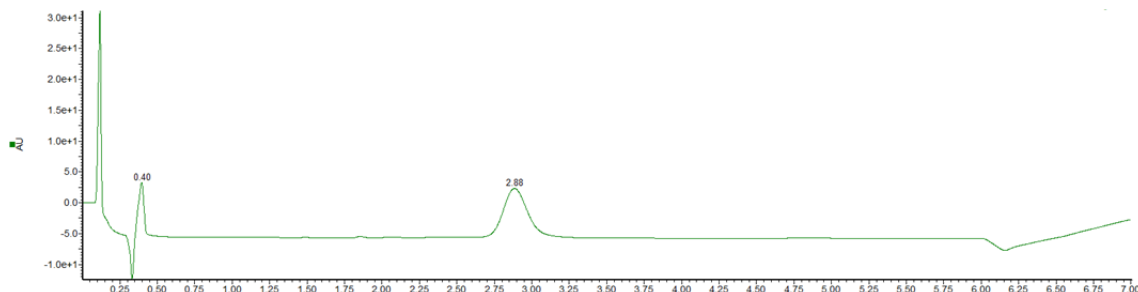

528  
529  
530

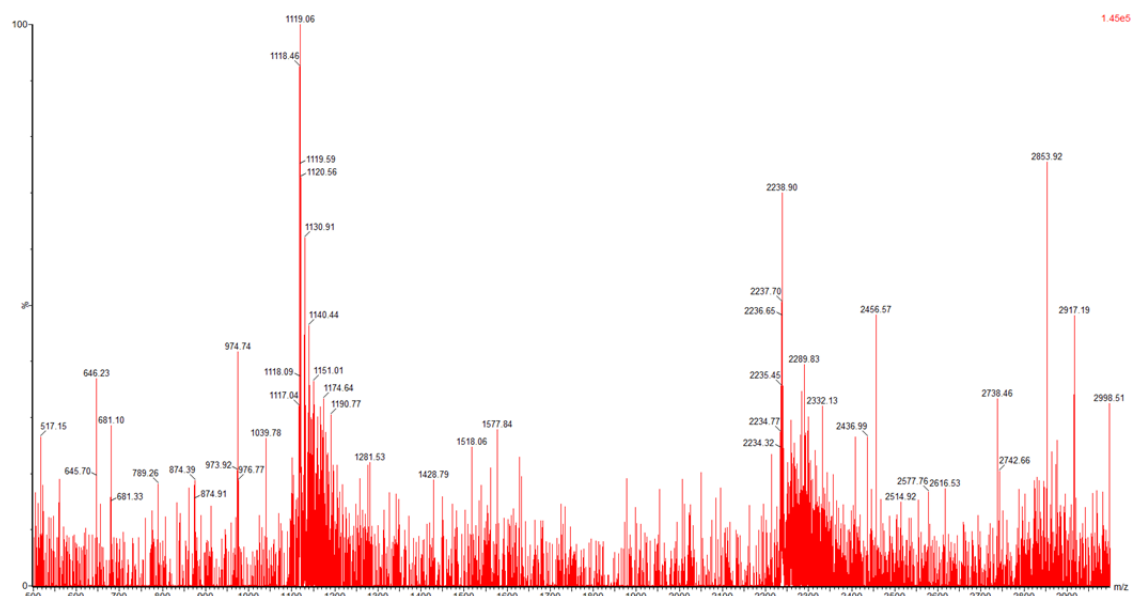

531  
532

**Supplementary Figure 44 | UPLC-MS characterization of 1-Npyr-Pep-2.** (Top image) UPLC characterization of 1-Npyr-Pep-2 with the gradient of 65 - 70% CH<sub>3</sub>CN in H<sub>2</sub>O. (Bottom image) MS characterization of 1-Npyr-Pep-2.

536  
537  
538  
539  
540  
541  
542  
543  
544  
545  
546  
547

548  
549

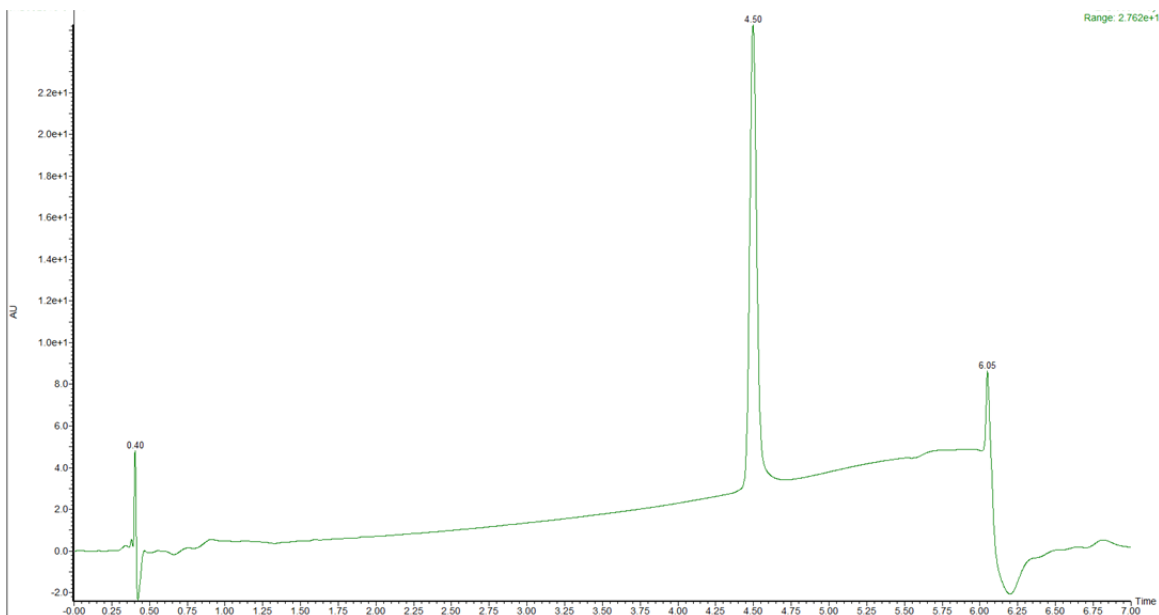

550  
551

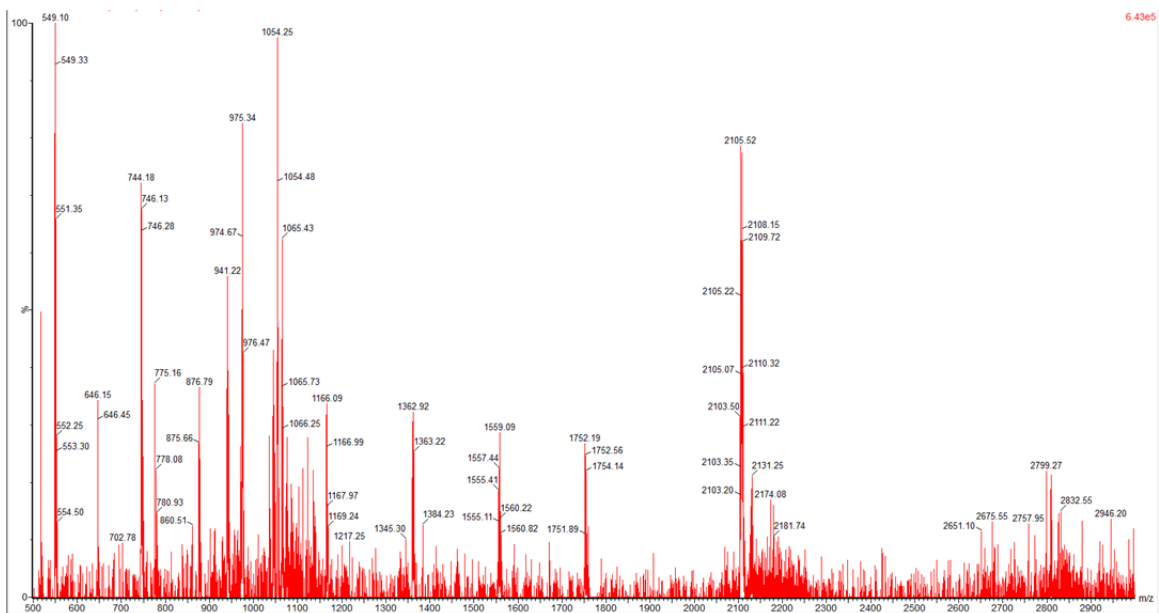

552  
553

554 **Supplementary Figure 45 | UPLC-MS characterization of 1-Nhex-Pep-2.** (Top  
555 image) UPLC characterization of 1-Nhex-Pep-2 with the gradient of 5 - 95% CH<sub>3</sub>CN in  
556 H<sub>2</sub>O. (Bottom image) MS characterization of 1-Nhex-Pep-2.

557  
558  
559  
560  
561  
562  
563

564

565

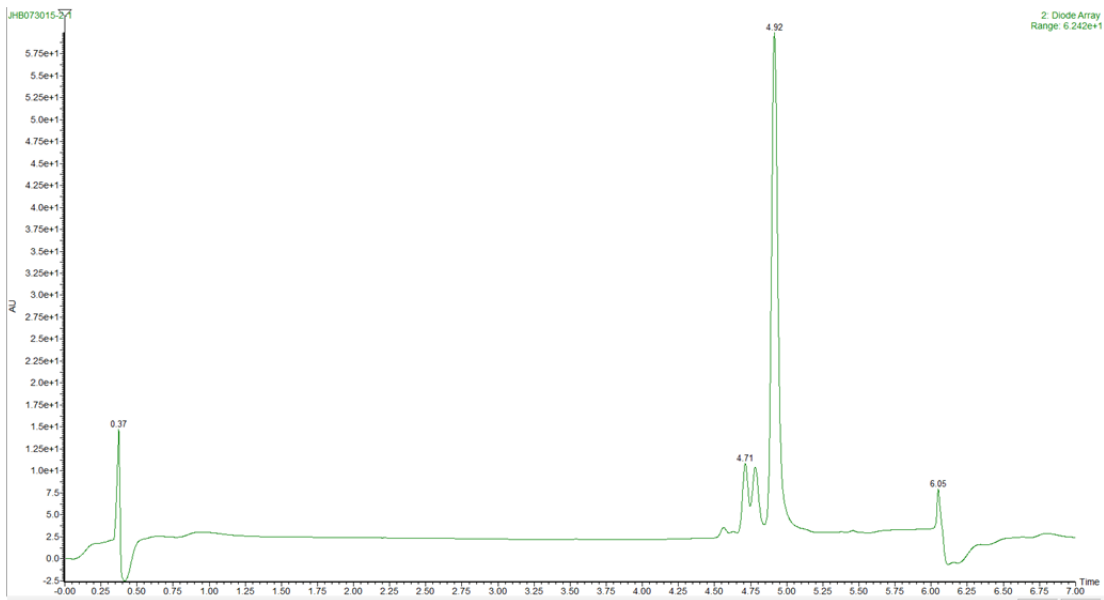

566  
567

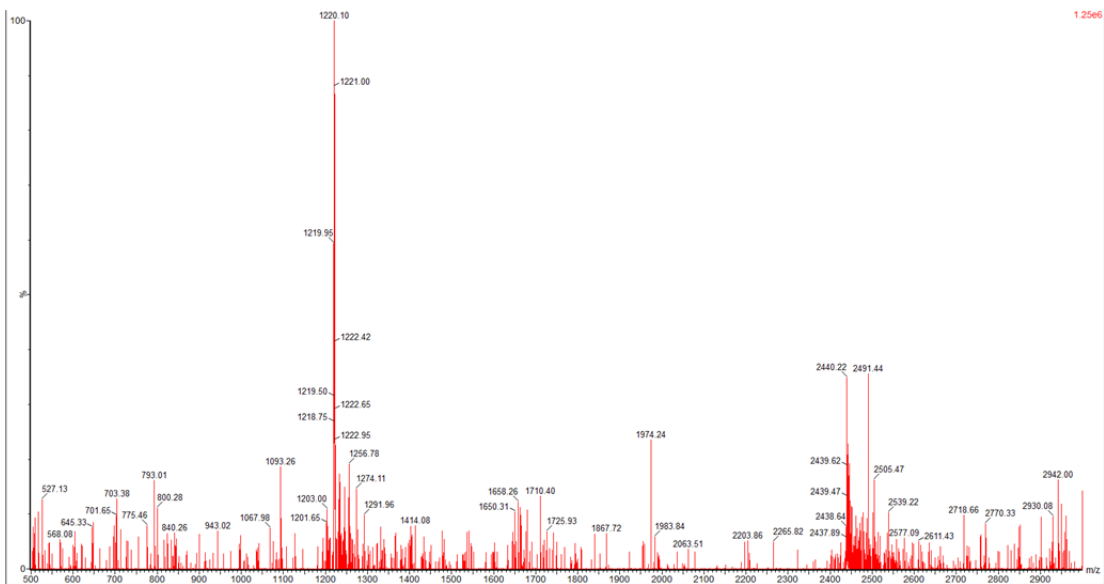

568  
569

570 **Supplementary Figure 46 | UPLC-MS characterization of 1,8-(Nazo)<sub>2</sub>-Pep-2.** (Top  
571 image) UPLC characterization of 1,8-(Nazo)<sub>2</sub>-**Pep-2** with the gradient of 5 - 95% CH<sub>3</sub>CN  
572 in H<sub>2</sub>O. (Bottom image) MS characterization of 1,8-(Nazo)<sub>2</sub>-**Pep-2**.  
573



574

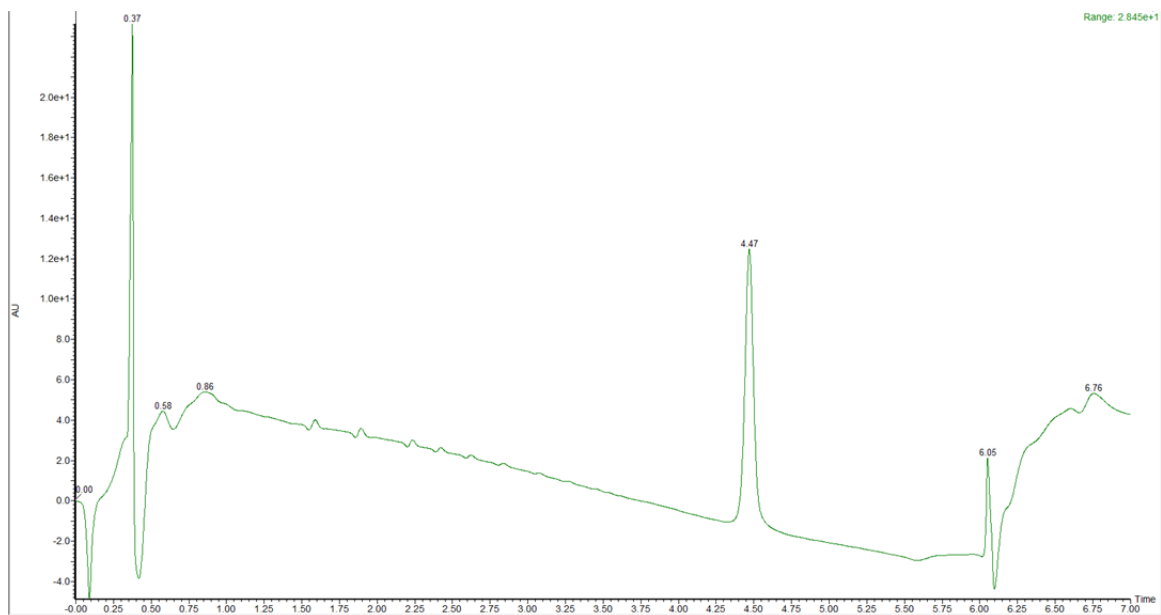

575  
576

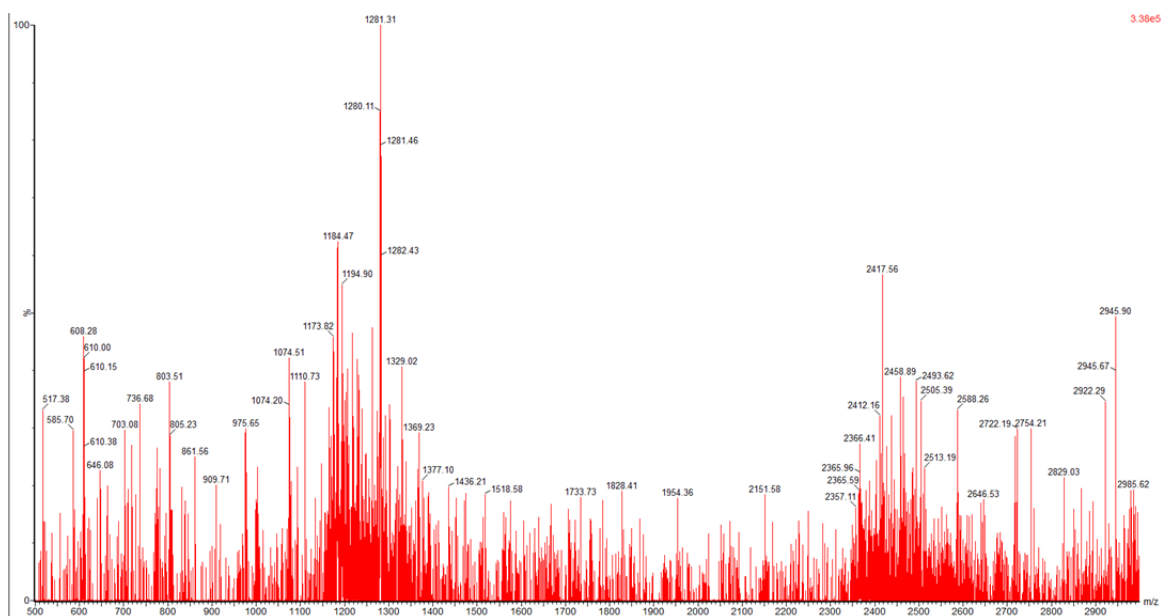

577  
578

579 **Supplementary Figure 47 | UPLC-MS characterization of 1,8-(Ntrp)<sub>2</sub>-Pep-2.** (Top  
580 image) UPLC characterization of 1,8-(Ntrp)<sub>2</sub>-Pep-2 with the gradient of 5 - 95% CH<sub>3</sub>CN  
581 in H<sub>2</sub>O. (Bottom image) MS characterization of 1,8-(Ntrp)<sub>2</sub>-Pep-2.  
582

583

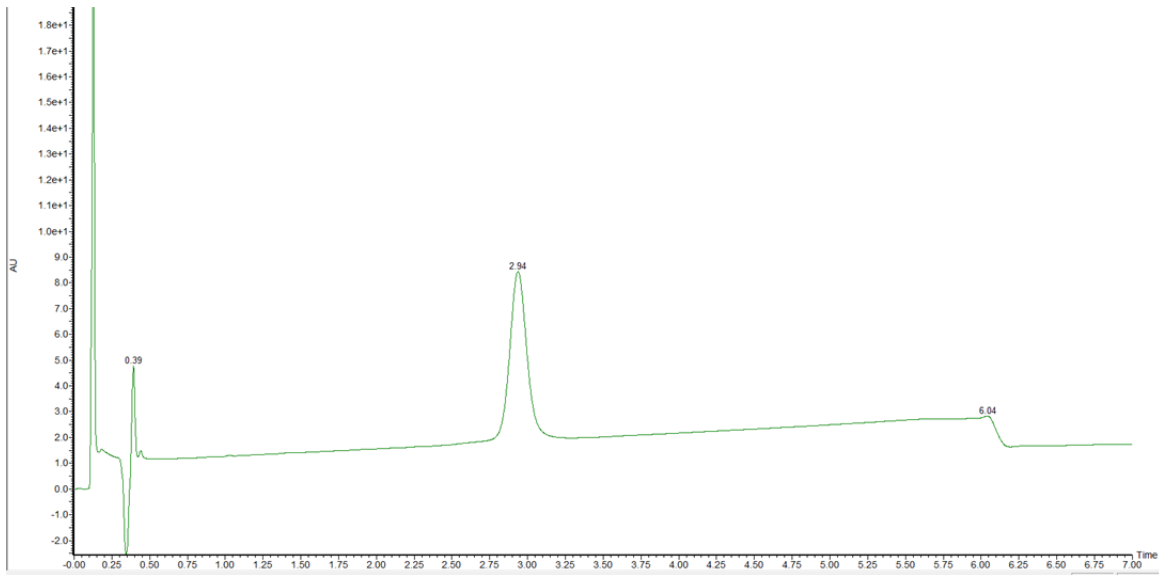

584  
585

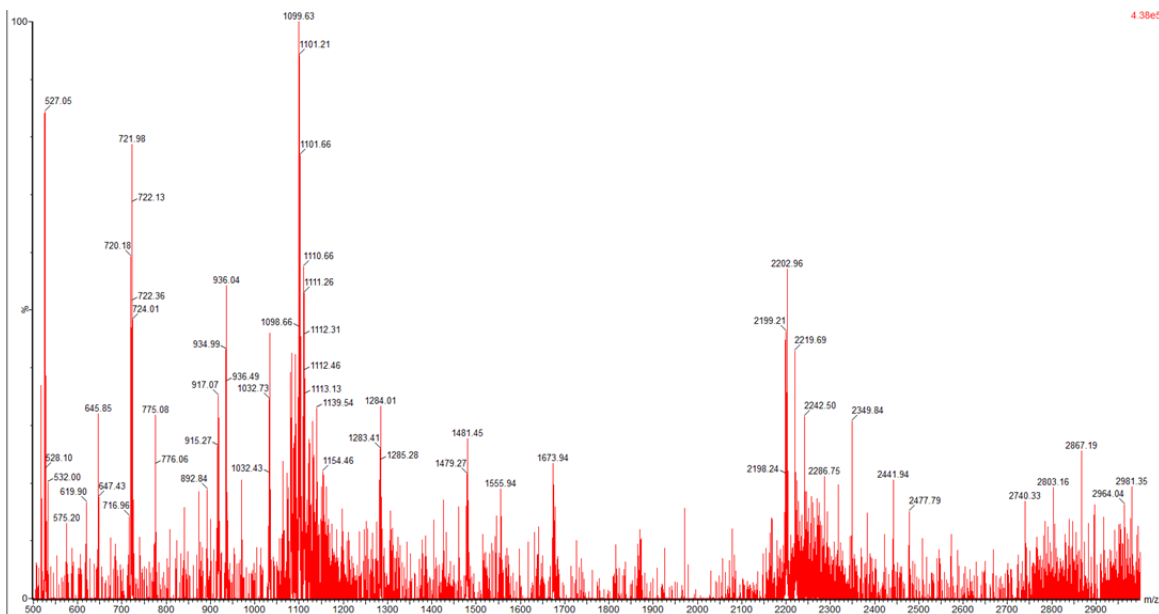

586  
587  
588  
589  
590  
591

**Supplementary Figure 48 | UPLC-MS characterization of 1,8-(Nse)<sub>2</sub>-Pep-2.** (Top image) UPLC characterization of 1,8-(Nse)<sub>2</sub>-Pep-2 with the gradient of 55 - 75% CH<sub>3</sub>CN in H<sub>2</sub>O. (Bottom image) MS characterization of 1,8-(Nse)<sub>2</sub>-Pep-2.

592

593

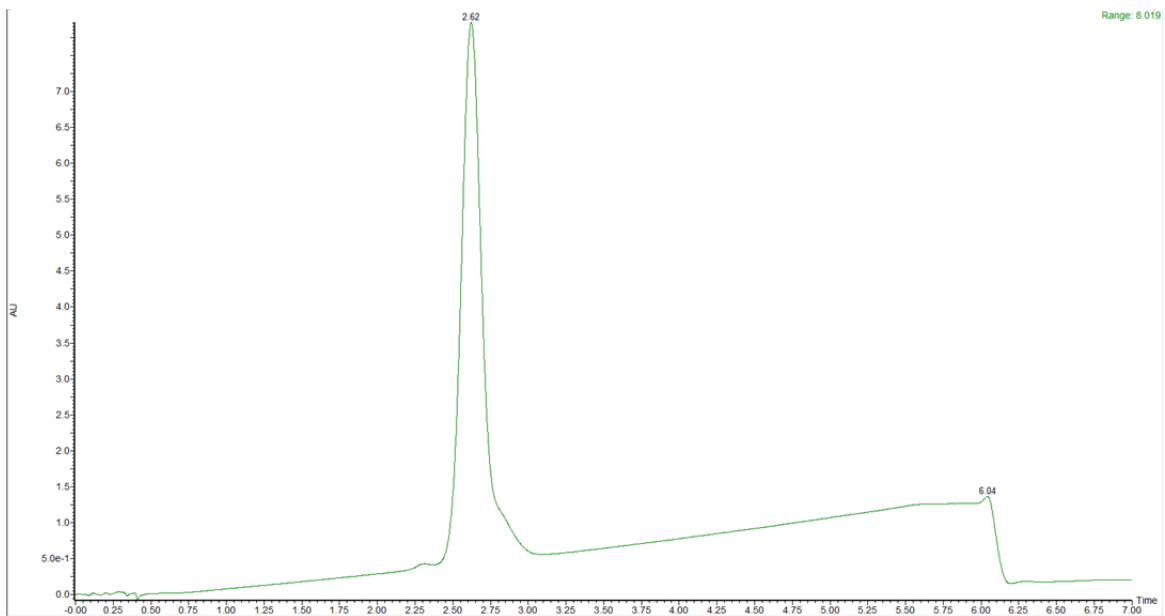

594  
595

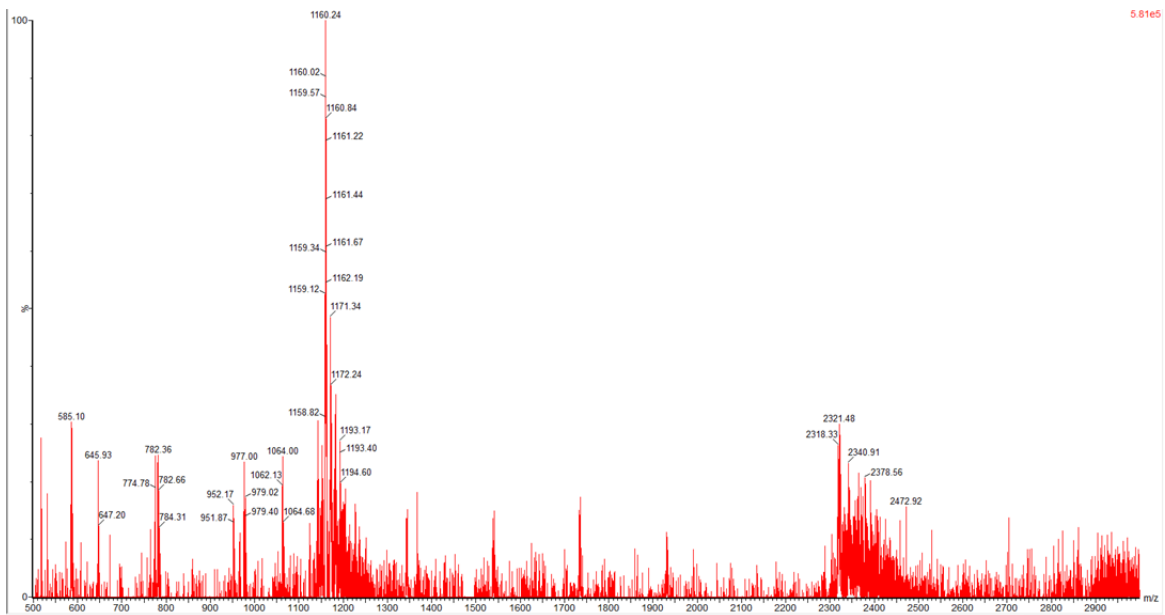

596  
597

598 **Supplementary Figure 49 | UPLC-MS characterization of 1,8-(Ntyr)<sub>2</sub>-Pep-2.** (Top  
599 image) UPLC characterization of 1,8-(Ntyr)<sub>2</sub>-Pep-2 with the gradient of 55 - 75%  
600 CH<sub>3</sub>CN in H<sub>2</sub>O. (Bottom image) MS characterization of 1,8-(Ntyr)<sub>2</sub>-Pep-2.

601

602

603

604

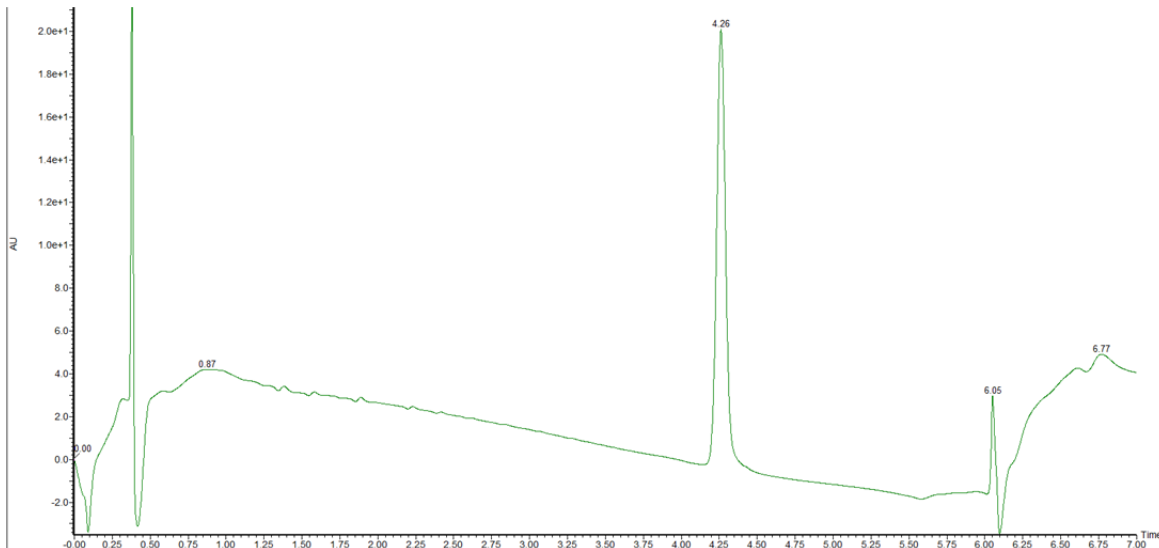

605

606

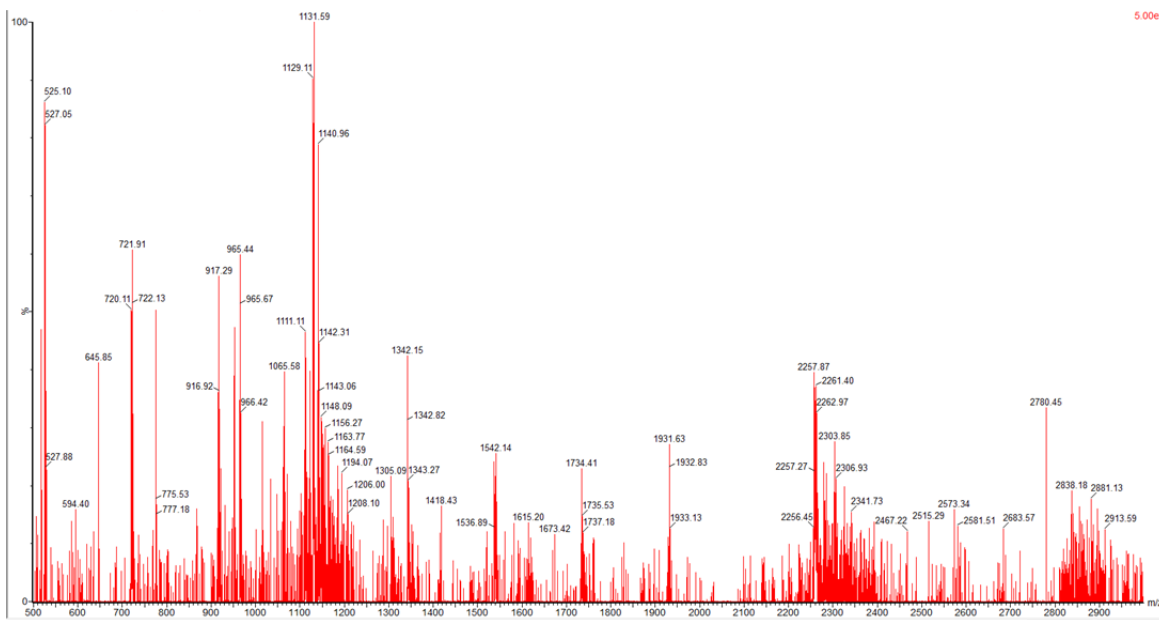

607

608

609

610

611

612

**Supplementary Figure 50 | UPLC-MS characterization of 1-Nse-8-Ntyr-Pep-2.** (Top image) UPLC characterization of 1-Nse-8-Ntyr-Pep-2 with the gradient of 5 - 95% CH<sub>3</sub>CN in H<sub>2</sub>O. (Bottom image) MS characterization of 1-Nse-8-Ntyr-Pep-2.

613

614

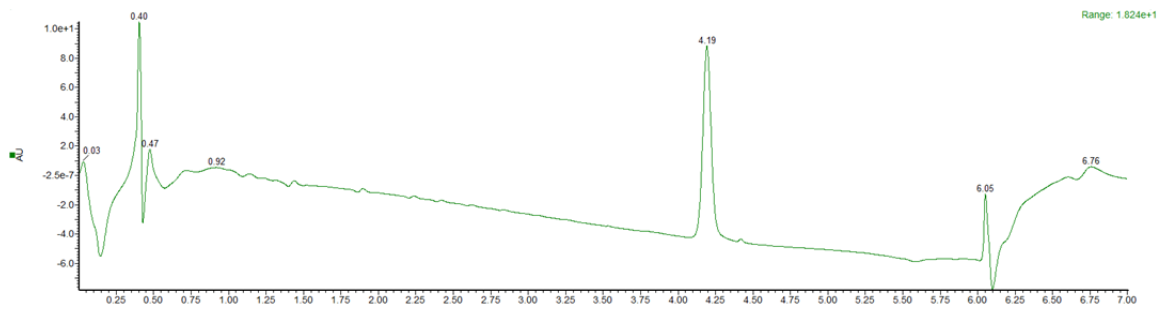

615

616

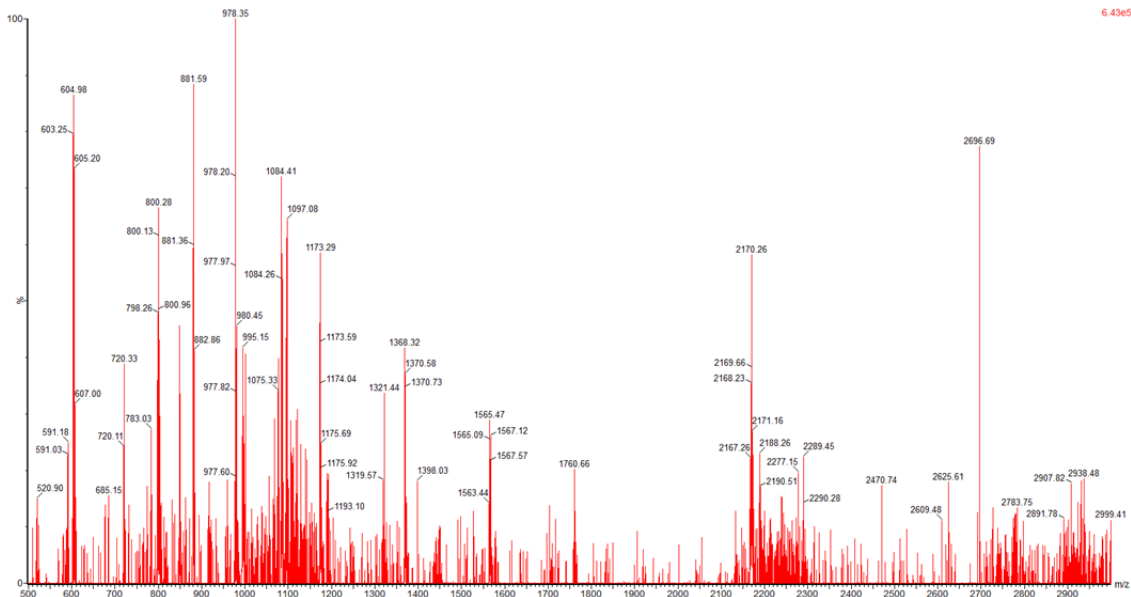

617

618

619 **Supplementary Figure 51 | UPLC-MS characterization of 13-Nte-Pep-2.** (Top image)

620 UPLC characterization of 13-Nte-Pep-2 with the gradient of 5 - 95% CH<sub>3</sub>CN in H<sub>2</sub>O.

621 (Bottom image) MS characterization of 13-Nte-Pep-2.

622



623

624

625

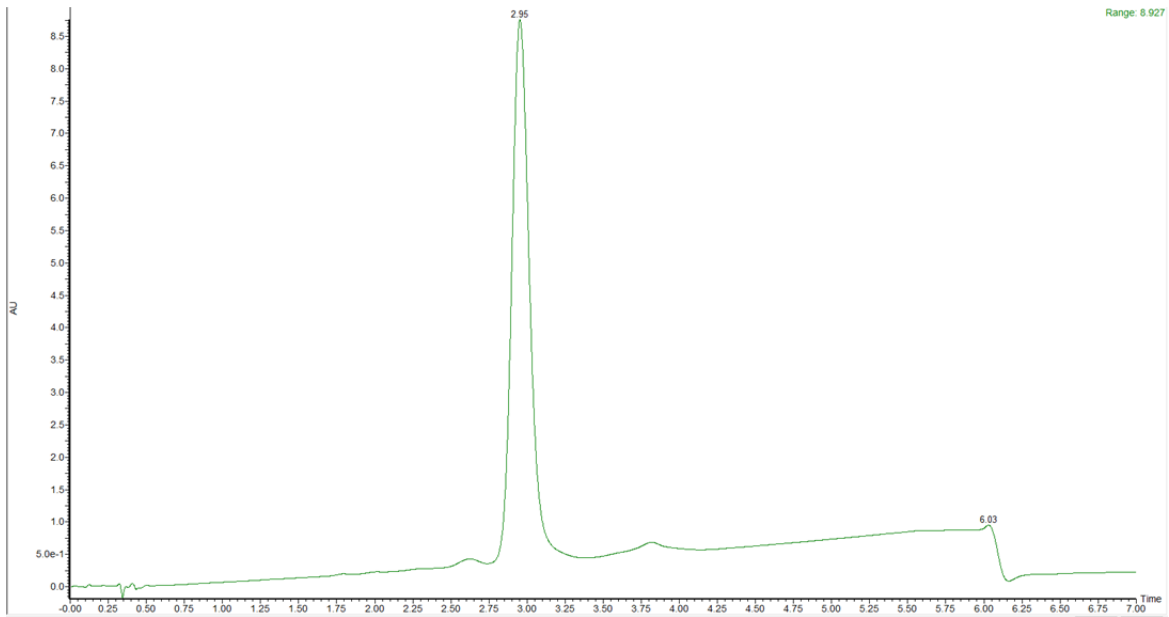

626  
627

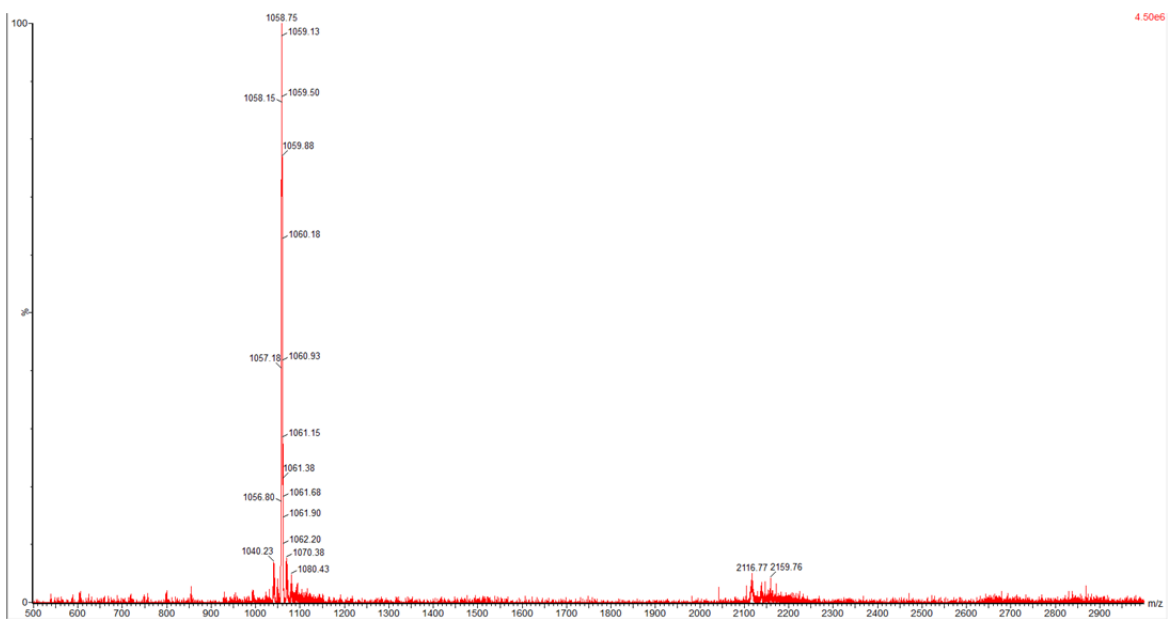

628  
629

630 **Supplementary Figure 52 | UPLC-MS characterization of 13-Nhis-Pep-2.** (Top  
631 image) UPLC characterization of 13-Nhis-Pep-2 with the gradient of 50 - 70% CH<sub>3</sub>CN in  
632 H<sub>2</sub>O. (Bottom image) MS characterization of 13-Nhis-Pep-2.

633  
634

635

636

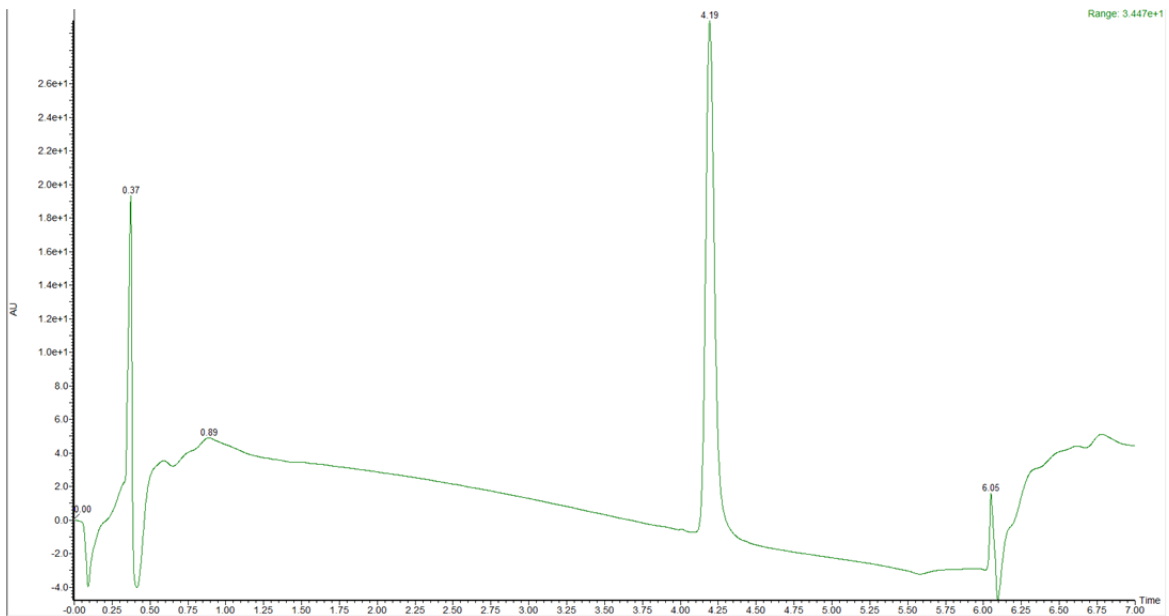

637  
638

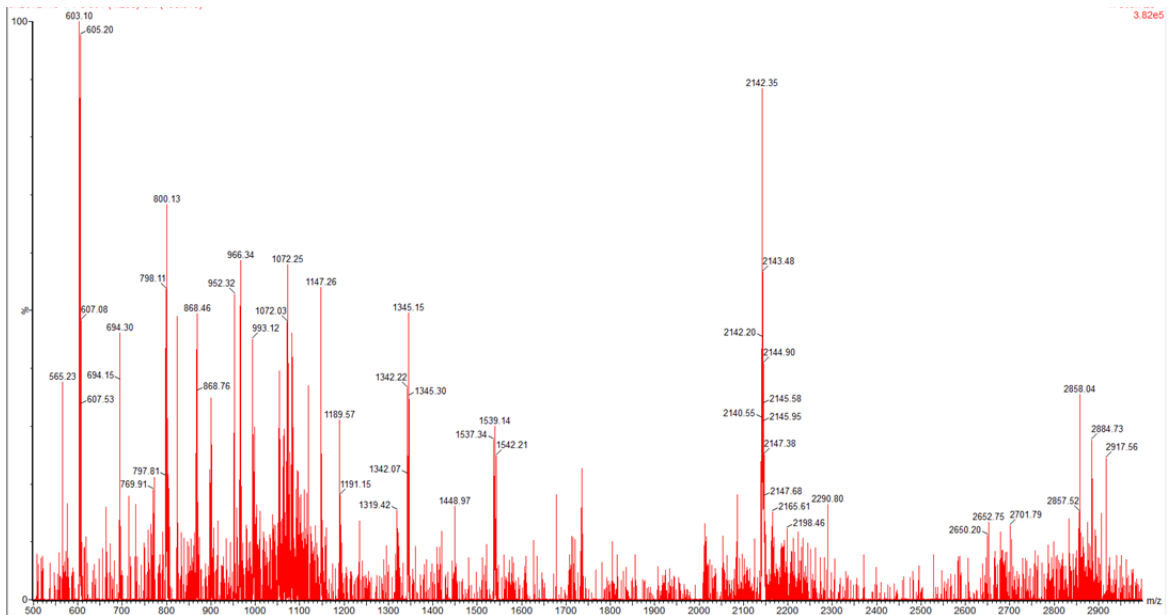

639  
640

641

642

643

644

**Supplementary Figure 53 | UPLC-MS characterization of 13-Ntyr-Pep-2.** (Top image) UPLC characterization of 13-Ntyr-Pep-2 with the gradient of 5 - 95% CH<sub>3</sub>CN in H<sub>2</sub>O. (Bottom image) MS characterization of 13-Ntyr-Pep-2.

645

646

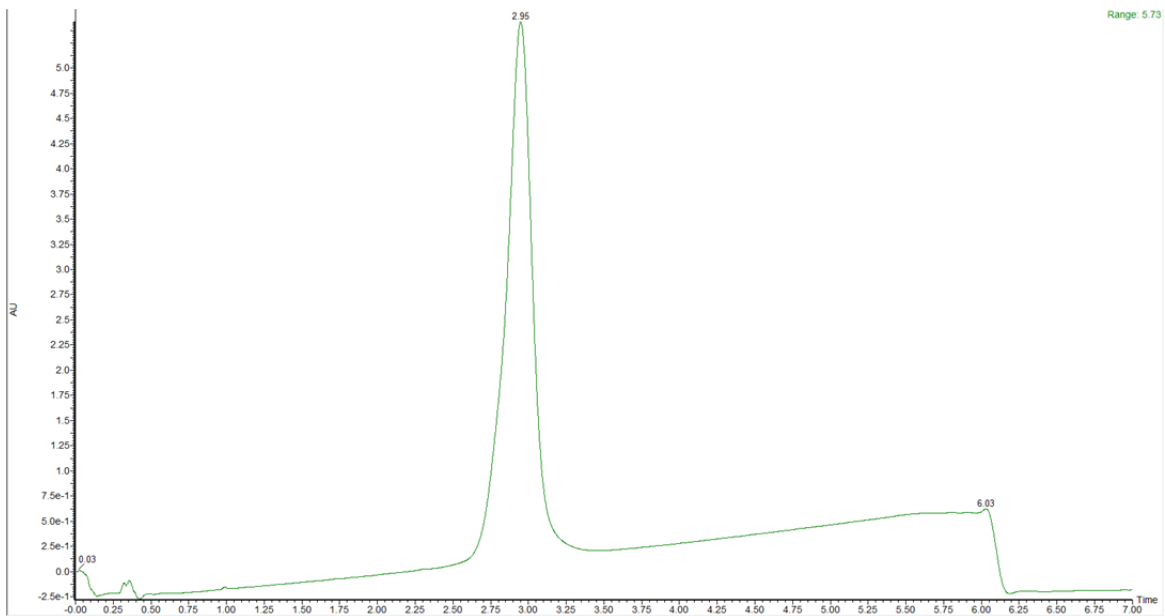

647  
648

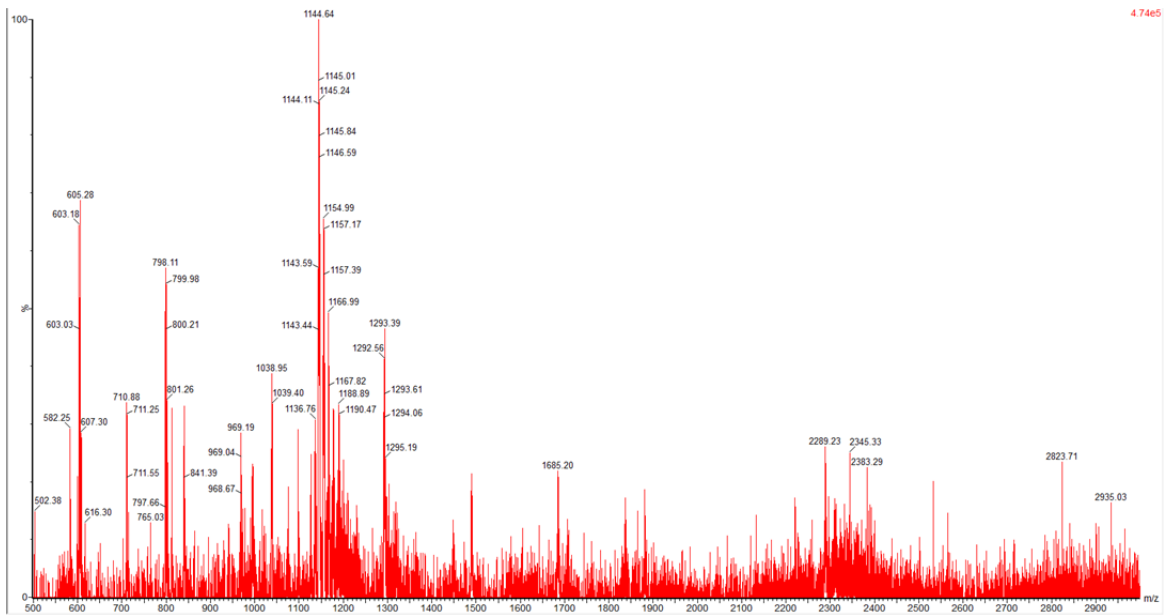

649  
650

651 **Supplementary Figure 54 | UPLC-MS characterization of 13-Nbce-Pep-2.** (Top  
652 image) UPLC characterization of 13-Nbce-Pep-2 with the gradient of 55 - 70% CH<sub>3</sub>CN  
653 in H<sub>2</sub>O. (Bottom image) MS characterization of 13-Nbce-Pep-2.

654

655

656

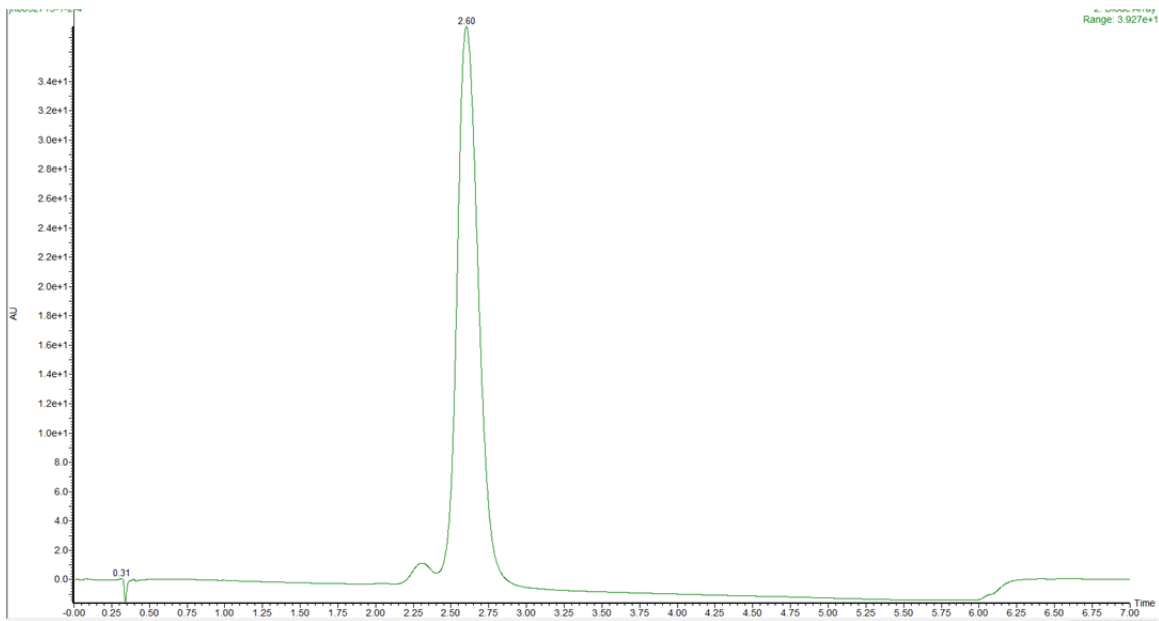

657  
658

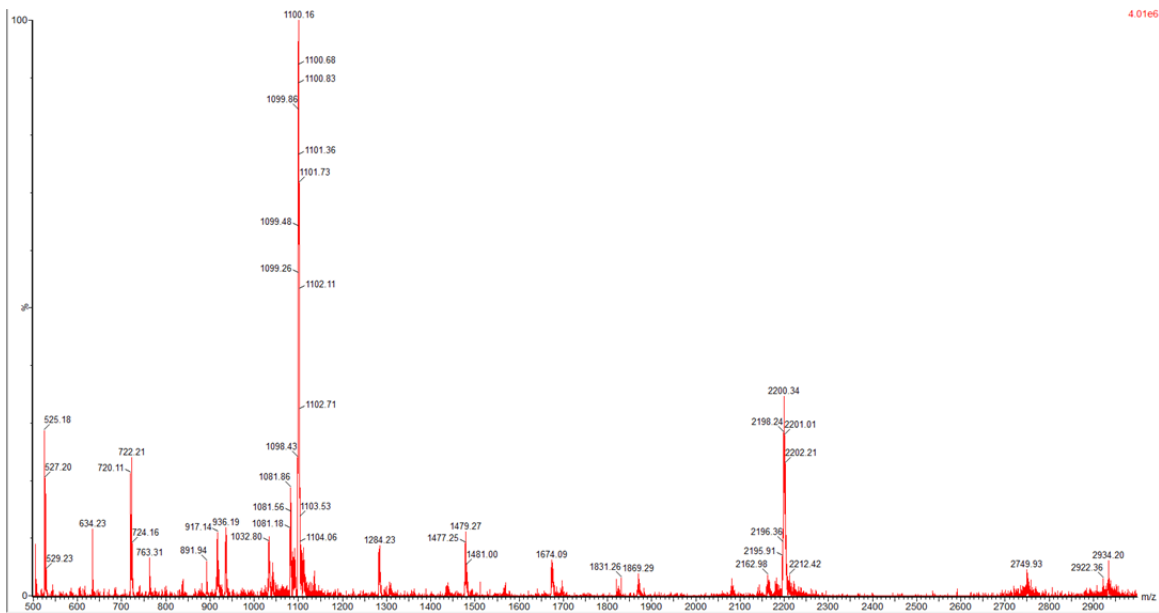

659

660

661

662

663

664

665

666

667

668

**Supplementary Figure 55 | UPLC-MS characterization of 1,14-(Nse)<sub>2</sub>-Pep-2.** (Top image) UPLC characterization of 1,14-(Nse)<sub>2</sub>-Pep-2 with the gradient of 55 - 75% CH<sub>3</sub>CN in H<sub>2</sub>O. (Bottom image) MS characterization of 1,14-(Nse)<sub>2</sub>-Pep-2.



669  
670  
671  
672

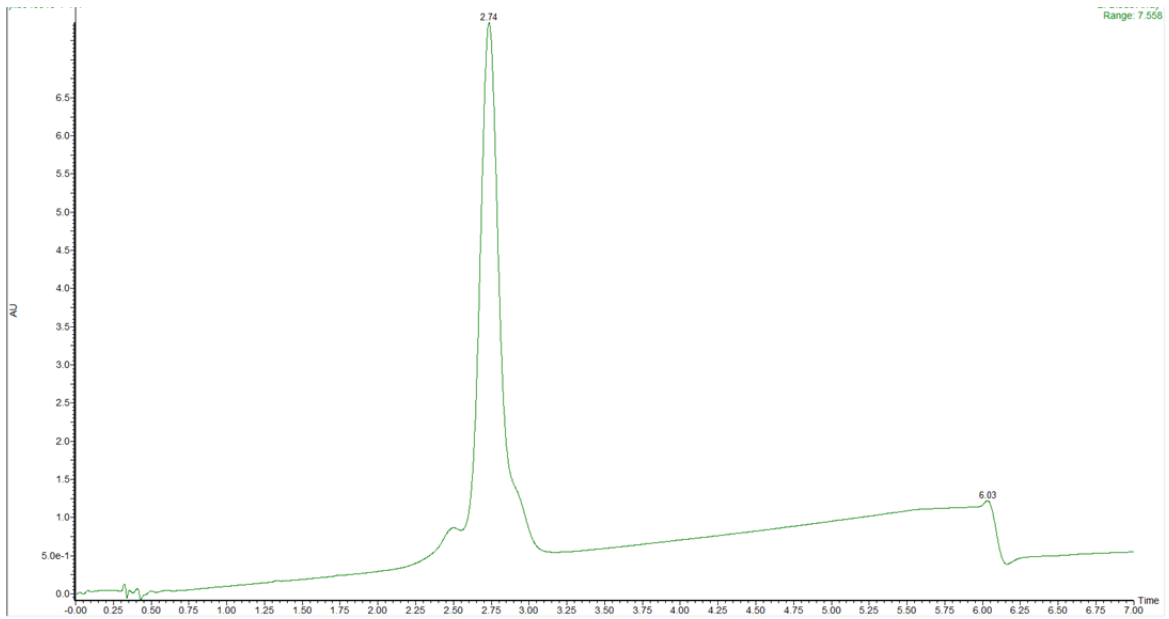

673  
674

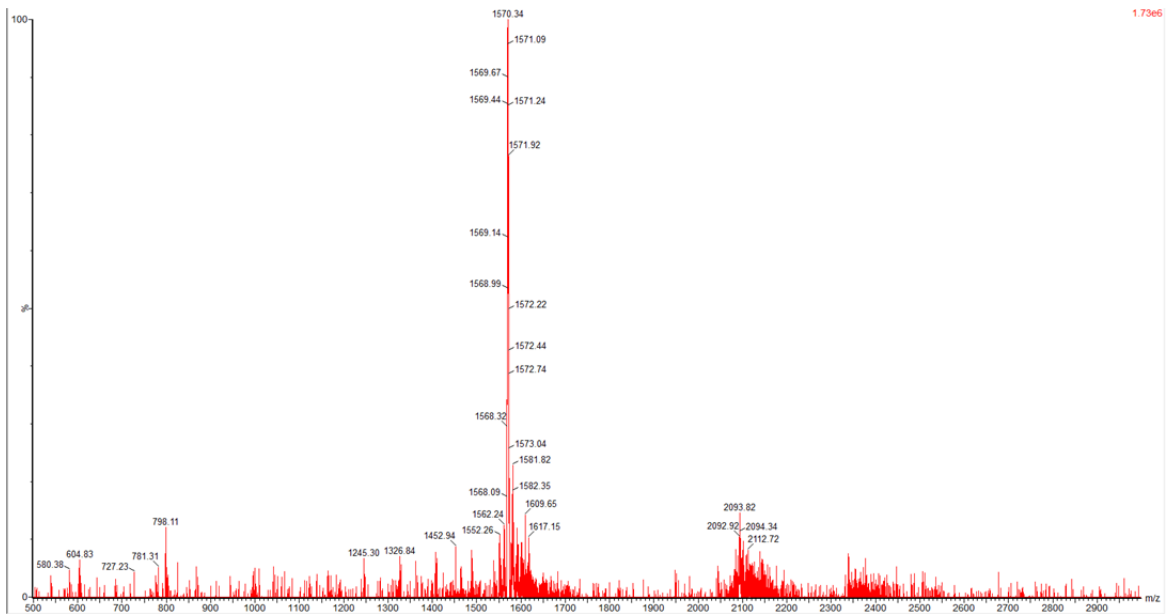

675  
676

677 **Supplementary Figure 56 | UPLC-MS characterization of Ncd-Pep-2.** (Top image)  
678 UPLC characterization of Ncd-Pep-2 with the gradient of 50 - 70% CH<sub>3</sub>CN in H<sub>2</sub>O.  
679 (Bottom image) MS characterization of Ncd-Pep-2.

680  
681  
682  
683

684

685

686

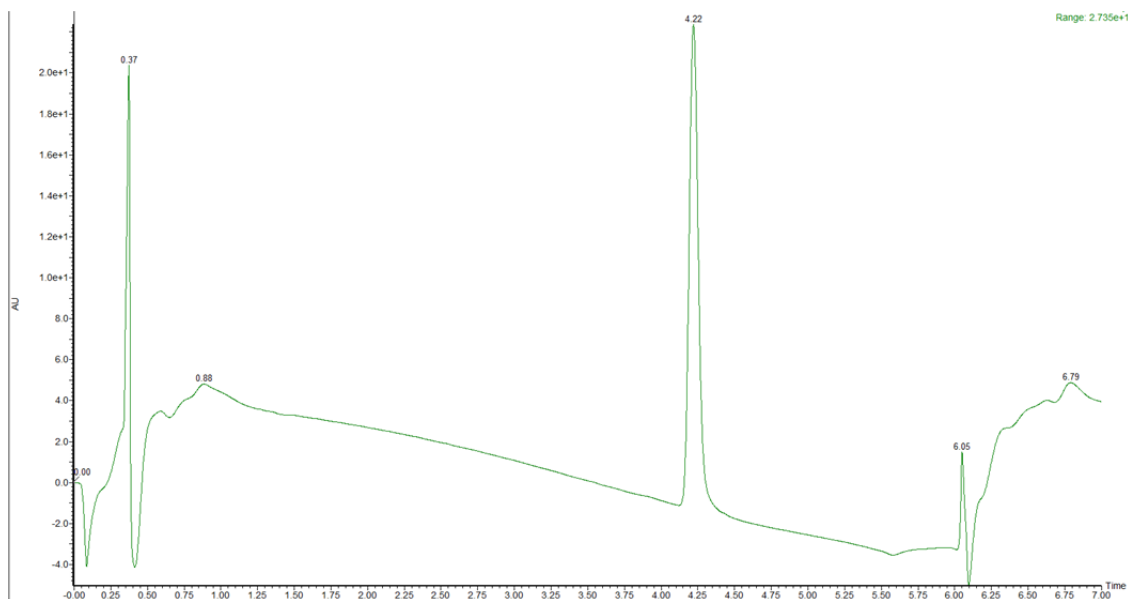

687

688

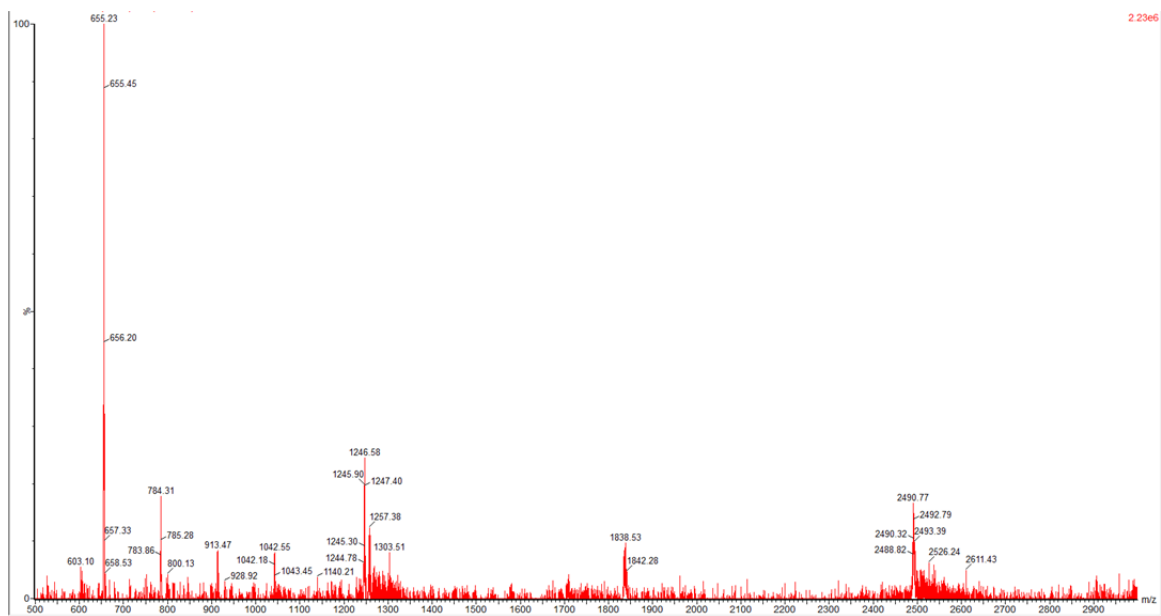

689

690

691 **Supplementary Figure 57 | UPLC-MS characterization of NHS-Rhodamine-labeled**  
692 **Pep-3.** (Top image) UPLC characterization of NHS-Rhodamine-labeled Pep-3 with the  
693 gradient of 5 - 95% CH<sub>3</sub>CN in H<sub>2</sub>O. (Bottom image) MS characterization of NHS-  
694 Rhodamine-labeled Pep-3.

## 695 Supplementary Methods

### 696 **Materials**

697  $\beta$ -alanine tert-butyl ester hydrochloride was purchased from Chem-Impex International,  
698 Inc. was deprotected by the sodium hydroxide aqueous solution, then extracted with  
699  $\text{CH}_2\text{Cl}_2$ , filtered and rotary evaporated for further reaction. *N,N'*-  
700 diisopropylcarbodiimide, bromoacetic acid and trifluoroacetic acid (TFA) were purchased  
701 from Chem-Impex International, Inc. 2-(4-Chlorophenyl)ethylamine, cysteamine  
702 hydrochloride and 4-aminoazobenzene were purchased from VWR. 1-  
703 Pyrenemethylamine hydrochloride, chloroacetic acid, histamine, ammonium hydroxide  
704 solution (28.0-30.0%  $\text{NH}_3$  basis), tyramine, tryptamine and  $\beta$ -cyclodextrin were  
705 purchased from Sigma-Aldrich. 4'-Aminobenzo-15-crown 5-Ether were purchased from  
706 TCI America. *p*-Toluenesulfonyl chloride and triphenylmethanol were purchased from  
707 Fisher Scientific. 2-(Tritylthio)ethanamine was synthesized according to the reported  
708 literature.<sup>1</sup> 2-(2-(2-methoxyethoxy)ethoxy)ethylamine was synthesized with the same  
709 protocol reported in the literature.<sup>2</sup> All other amine submonomers and other reagents are  
710 obtained from commercial sources and used without further purification.

711

### 712 **Synthesis of 2-(tritylthio)ethanamine**

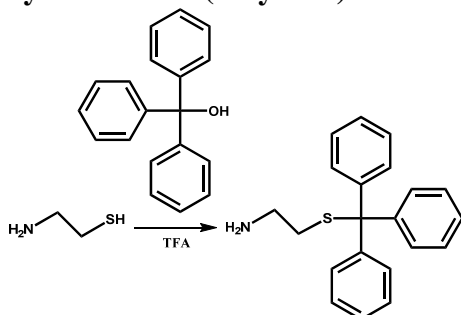

713

714 2-(tritylthio)ethanamine was synthesized according to the reported literature.<sup>1</sup> For the  
715 detail synthesis route, cysteamine hydrochloride (1.931 g, 17 mmol) was dissolved in the  
716 8 mL of TFA. Triphenylmethanol (4.426 g, 17 mmol) were added, reacting for 40  
717 minutes at room temperature. TFA was evaporated under a stream of nitrogen gas, and  
718 the resulted residue was triturated with ethyl ether. The white precipitate was filtered and  
719 then partitioned with aqueous NaOH (25 mL, 1M). Finally, the crude product solution  
720 was extracted with ethyl acetate. The organic layer was dried with anhydrous  $\text{Na}_2\text{SO}_4$ .  
721 The white solid product were obtained after the rotary evaporation and dried in a vacuum  
722 drying oven at 40 °C for 24 hours (4.408 g, 13.8 mmol, Yield: 81%; MS *m/z*: (positive  
723 ion ESI) 639.15 for  $[2\text{M}]^+$ .

724

### 725 **Synthesis of mono-6-amino-6-deoxy-cyclodextrin (CD-NH<sub>2</sub>)**

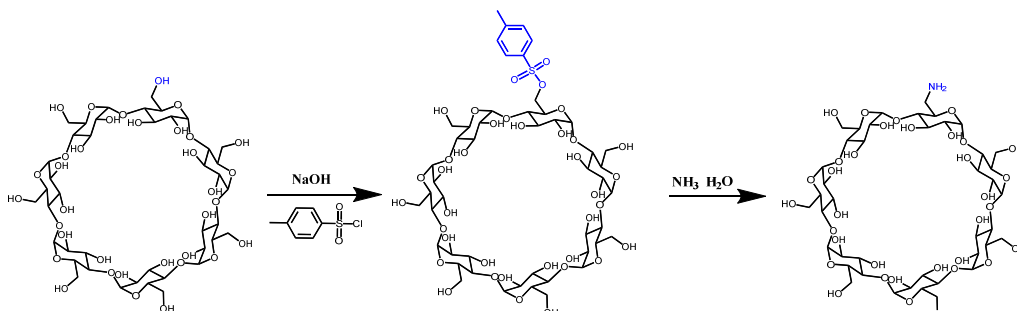

726

727 In the first step, mono-6-(*p*-toluenesulfonyl)-6-deoxy-cyclodextrin (CD-Ts) was  
 728 synthesized according to the reported literature.<sup>3</sup>  $\beta$ -Cyclodextrin (50 g, 44.1 mmol) was  
 729 dissolved in the 300 mL of deionized water, immersed in the 0 °C ice bath. NaOH (5.475 g,  
 730 137 mmol) was added, leading to the complete dissolution of  $\beta$ -cyclodextrin. *p*-  
 731 Toluenesulfonyl chloride (8.4 g, 44.1 mmol) dissolved in 30 mL of acetonitrile was step-  
 732 wisedly dropped into the solution. After that, the mixture was reacting 3 hours at room  
 733 temperature. pH value of the mixture was adjusted to about 9.0, putting in the 4 °C fridge  
 734 overnight. The crude product was filtered and dried in a vacuum drying oven at 50 °C for  
 735 2 days. The product of CD-Ts was obtained as white solid (10.977 g, 8.5 mmol, Yield:  
 736 19.3%).

737 CD-Ts (4.723 g, 3.66 mmol) was added into the single-neck round-bottom flask. 50 mL  
 738 of ammonium hydroxide solution was added to complete dissolve the sample, reacting  
 739 for 3 days at room temperature. The crude product was precipitated in the ice cold  
 740 acetone for 3 times and dried in a vacuum drying oven at 30 °C for 24 hours. The final  
 741 product of CD-NH<sub>2</sub> was white solid (4.040g, 3.56 mmol, Yield: 97%), MS *m/z*: (positive  
 742 ion ESI) 1134.29 for [M<sup>+</sup>].  
 743

## 744 Peptoid synthesis

### 745 Methods for the automated solid-phase synthesis

746 Lipid-like peptoids were synthesized on a commercial Aapptec Apex 396 robotic  
 747 synthesizer using a modified solid-phase submonomer synthesis method as described  
 748 previously.<sup>4,5</sup> Rink amide resin (0.09 mmol) was used to generate C-terminal amide  
 749 peptoids. In this method, the Fmoc group on the resin was deprotected by adding 2 mL  
 750 of 20% (v/v) 4-Methylpiperidine/*N,N*-dimethylformamide (DMF), agitating for 20 min,  
 751 draining, and washing with DMF. All DMF washes consisted of the addition of 1.5 mL of  
 752 DMF, followed by agitation for 1 min (repeated five times). An acylation reaction was  
 753 then performed on the amino resin by the addition of 1.6 mL of 0.6 M bromoacetic acid  
 754 in DMF, followed by 0.35 mL of 50% (v/v) *N,N*-diisopropylcarbodiimide (DIC)/DMF.  
 755 The mixture was agitated for 30 minutes at room temperature, drained, and washed with  
 756 DMF for 5 times. Nucleophilic displacement of the bromide with various primary amines  
 757 occurred by a 1.6 mL addition of the primary amine monomer as a 0.6 M solution in *N*-  
 758 methyl-2-pyrrolidone (NMP), followed by agitation for 60 minutes at room temperature.  
 759 The monomer solution was drained from the resin, and the resin was washed with DMF  
 760 for 5 times. The acylation and displacement steps were repeated until a lipid-like peptoid  
 761 of the desired length was synthesized.  
 762

### 763 Methods for the manual synthesis

764 Rink amide resin (0.09 mmol) was used to generate C-terminal amide peptoids. In the  
765 synthesis procedure, the Fmoc groups on the resin were deprotected by adding 2 mL of  
766 20% (v/v) 4-methylpiperidine/*N,N*-dimethylformamide (DMF), agitating for 40 min,  
767 filtering, and washing with DMF. For all DMF washes, 1 mL DMF was added and then  
768 agitated for 1 min (repeated five times). An acylation reaction was then performed on the  
769 amino resin by the addition of 1.5 mL of 0.6 M bromoacetic acid in DMF, followed by  
770 adding 0.30 mL of 50% (v/v) *N,N*-diisopropylcarbodiimide (DIC)/DMF. The mixture  
771 was agitated for 10 minutes at room temperature, filtered and washed with DMF for 5  
772 times. Nucleophilic displacement of the bromine with different primary amines occurred  
773 by the addition of 1.5 mL of 0.6 M primary amine monomer in *N*-methyl-2-pyrrolidone  
774 (NMP), followed by the agitation for 10 minutes at room temperature. The monomer  
775 solution were filtered from the resin, and washed with DMF for 5 times. The acylation  
776 and displacement steps were repeated until the designed peptoid was synthesized.

777

### 778 **Methods for synthesizing other uncommon sequences**

779 **Synthesis of Pep-3:** The resulting rink amide resins (0.09 mmol) containing Pep-2  
780 obtained from automated solid-phase synthesis were mixed with a DMF solution of  
781 Fmoc-6-aminohexanoic acid (1.5 mL, 0.9 mmol) and 0.50 mL of 50% (v/v) *N,N*-  
782 diisopropylcarbodiimide (DIC)/DMF. The mixture was agitated overnight at room  
783 temperature, filtered, and washed well with DMF. The terminal Fmoc group was  
784 deprotected by adding 2 mL of 20% (v/v) 4-methylpiperidine/DMF. The mixture was  
785 agitated for 40 min, filtered, and washed well with DMF.

786

787 **Synthesis of Ncd-Pep-2:** The resulting rink amide resins (0.09 mmol) containing Pep-2  
788 obtained from automated solid-phase synthesis were mixed with a DMF solution of  
789 bromoacetic acid (1.5 mL, 0.9 mmol) and 0.30 mL of 50% (v/v) *N,N*-  
790 diisopropylcarbodiimide (DIC)/DMF. The mixture was agitated for 10 minutes at room  
791 temperature, filtered and washed with DMF for 5 times. In the nucleophilic displacement  
792 step, 1.5 mL of 0.3 M CD-NH<sub>2</sub> in DMF and K<sub>2</sub>CO<sub>3</sub> (100 mg, 0.72 mmol) were added,  
793 followed by the agitation for 3 days at 40 °C. The monomer solution were filtered from  
794 the resin, washed with deionized water for 5 times, and then washed well with DMF.

795

796 **Synthesis of peptoids containing *N*-[4-(2-phenyldiazenyl)phenyl]glycines (Nazo)**  
797 **13-Nazo-Pep-2:** Rink amide resins (0.09 mmol) containing Pep-2 were mixed with 1.5  
798 mL of 0.6 M bromoacetic acid in DMF, followed by adding 0.30 mL of 50% (v/v) *N,N*-  
799 diisopropylcarbodiimide (DIC)/DMF. The mixture was agitated for 10 minutes at room  
800 temperature, filtered and washed with DMF. In the nucleophilic displacement step, a  
801 NMP solution of 4-Aminoazobenzene (1.5 mL, 0.9 mmol) and tetrabutylammonium  
802 iodide (TBAI, 100 mg, 0.27mmol) was added into the above resins, followed by the  
803 agitation for 2 days at 40 °C. The resulting resins were first washed with deionized water  
804 for 5 times and then washed with DMF for 5 times.

805

806 **Synthesis of peptoids containing *N*-[benzo-15-crown-5-ether]glycines (Nbce)**  
807 **13-Nbce-Pep-2:** Similar to the synthesis of **13-Nazo-Pep-2**, in the nucleophilic  
808 displacement step, a NMP solution 4'-Aminobenzo-15-crown 5-Ether (1.5 mL, 0.9 mmol)  
809 and tetrabutylammonium iodide (TBAI, 100 mg, 0.27mmol) were used, followed by the

810 agitation for 2 days at 40 °C. The resulting resins were first washed with deionized water  
811 for 5 times and then washed with DMF for 5 times.

812

### 813 **Synthesis of peptoids containing [2-(4-imidazolyl)ethylamine]glycines (Nhis)**

814 **13-Nhis-Pep-2:** Rink amide resins (0.09 mmol) containing Pep-2 were mixed with 1.5  
815 mL of 0.6 M chloroacetic acid in DMF, followed by adding 0.30 mL of 50% (v/v) N,N-  
816 diisopropylcarbodiimide (DIC)/DMF. The mixture was agitated for 10 minutes at room  
817 temperature, filtered and washed with DMF. In the nucleophilic displacement step, a  
818 NMP solution of histamine (1.5 mL, 0.9 mmol) was added into the above resins, followed  
819 by the agitation for one hour at 40 °C. The resulting resins were washed well with DM.

820

821 *Notes: After introducing Nhis in the peptoid, chloroacetic acid was used instead of*  
822 *bromoacetic acid for all subsequent steps of acylation in order to reduce side product*  
823 *formation as described previously.<sup>6</sup> In the displacement step, primary amines substituted*  
824 *the chloride atom under the condition of agitation 1 hour at 40 °C.*

825

### 826 **Synthesis of peptoids containing N-[2-(1H-indol-3-yl)ethyl]glycine (Ntrp)**

827 **13-Ntrp-Pep-2:** Rink amide resins (0.09 mmol) containing Pep-2 were mixed with 1.5  
828 mL of 0.6 M chloroacetic acid in DMF, followed by adding 0.30 mL of 50% (v/v) N,N-  
829 diisopropylcarbodiimide (DIC)/DMF. The mixture was agitated for 10 minutes at room  
830 temperature, filtered and washed well with DMF. In the nucleophilic displacement step, a  
831 NMP solution of tryptamine (1.5 mL, 0.9 mmol) was added into the above resins,  
832 followed by the agitation for one hour at 40 °C. The resulting resins were washed with  
833 DMF for 5 times.

834

835 *Notes: After introducing Ntrp in the peptoid, chloroacetic acid was used instead of*  
836 *bromoacetic acid for all subsequent steps of acylation in order to reduce side product*  
837 *formation as described previously.<sup>6</sup> In the displacement step, primary amines substituted*  
838 *the chloride atom under the condition of agitation 1 hour at 40 °C.*

839

### 840 **Synthesis of peptoids containing N-[(1-pyrenemethyl)]glycines (Npyr)**

841 **1-Npyr-Pep-2:** Rink amide resins (0.09 mmol) containing Pep-2 were mixed with 1.5  
842 mL of 0.6 M bromoacetic acid in DMF, followed by adding 0.30 mL of 50% (v/v) N,N-  
843 diisopropylcarbodiimide (DIC)/DMF. The mixture was agitated for 10 minutes at room  
844 temperature, filtered and washed with DMF for 5 times. In the nucleophilic displacement  
845 step, a 3.0 mL methanol solution of 1-Pyrenemethylaminehydrochloride (0.9 mmol) and  
846 N,N-Diisopropylethylamine (DIPEA) (0.9 mmol) was added into the above resins,  
847 followed by the agitation for 30 minutes at room temperature. The resulting resins were  
848 washed with DMF for 5 times.

849

### 850 **Synthesis of NHS-Rhodamine-labeled Pep-3:**

851 After the synthesis of **Pep-3**, 2 mL of DMF solution of NHS-Rhodamine (0.9 mmol) and  
852 0.50 mL of 50% (v/v) N,N-diisopropylcarbodiimide (DIC)/DMF were added and mixed  
853 with resins containing **Pep-3**, followed by the agitation for overnight at room  
854 temperature. The monomer solution were filtered from the resin, and washed with DMF  
855 for 5 times.



856 **Peptoid cleavage and HPLC purification**

857

858 For most of lipid-like peptoids, their final crude products were obtained by cleaving the  
859 corresponding resins with addition of 95% trifluoroacetic acid (TFA) in water. For  
860 peptoids containing *N*-(2-thiolethyl)glycine (Nse) side chains, their crude products were  
861 cleaved from the corresponding resins with the addition of a solution containing 90%  
862 TFA, 5% triisopropylsilane and 5% water. TFA was then evaporated under a stream of  
863 N<sub>2</sub> gas. Finally, crude peptoids were dissolved in H<sub>2</sub>O/CH<sub>3</sub>CN (v/v=1:1) for HPLC  
864 purification.

865

866 All peptoids were purified by reverse-phase HPLC on a XBridge™ Prep C18 OBD™  
867 column (10 μm, 19 mm × 100 mm), using a narrow gradient of acetonitrile in H<sub>2</sub>O with  
868 0.1% TFA over 15 min. Purified peptoids were analyzed using Waters ACQUITY  
869 reverse-phase UPLC (the corresponding gradient at 0.4 mL/min over 7 min at 40°C with  
870 a ACQUITY®BEH C18, 1.7 μm, 2.1 mm × 50 mm column) that was connected with a  
871 Waters SQD2 mass spectrometry system (See Supplementary Figs 29 – 57). The final  
872 peptoid product was lyophilized from its solution in a mixture (v/v = 1:1) of water and  
873 acetonitrile. The peptoid powder was finally divided into small portions (1.0 or 2.0 × 10<sup>-6</sup>  
874 mol) and stored at -80°C.

875

876 **Peptoid sequences and their UPLC-MS characterizations** (See Supplementary Figs 29  
877 – 57).

878 Structures of the synthesized peptoids and molecular weight of each peptoid as  
879 determined by mass spectrometry are shown below.

880

881 Pep-1: 1965.6 (Molecular weight), 1966.4 (Found:[M+H]<sup>+</sup>), 983.7 (Found:[M/2+H]<sup>+</sup>).

882 UPLC-MS spectra were shown in Supplementary Fig. 29.

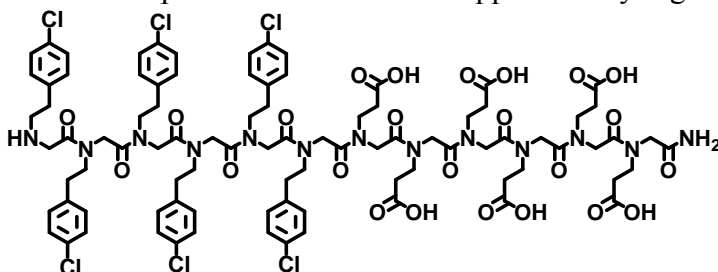

883

884

885 Pep-2: 1965.6 (Molecular weight), 983.6 (Found:[M/2+H]<sup>+</sup>), 1966.3 (Found:[M+H]<sup>+</sup>).

886 UPLC-MS spectra were shown in Supplementary Fig. 30.

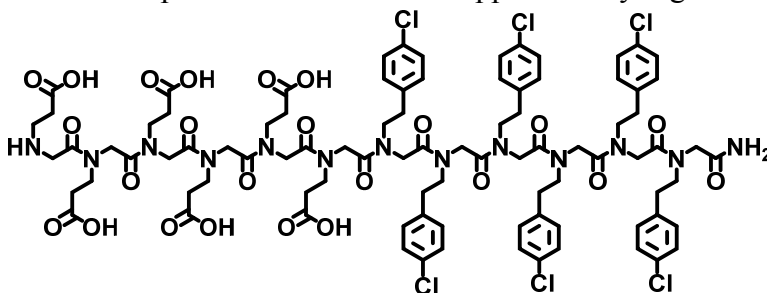

887

888

889 Pep-3: 2078.8 (Molecular weight), 2079.4 (Found:[M+H]<sup>+</sup>), 1040.4 (Found: [M/2+H]<sup>+</sup>).  
890 UPLC-MS spectra were shown in Supplementary Fig. 31.  
891

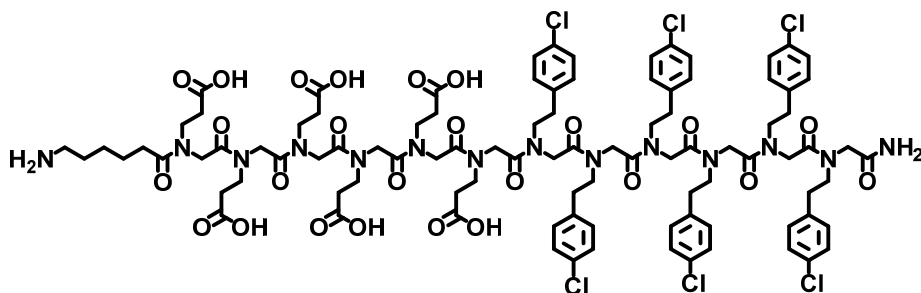

892  
893  
894

895 Pep-4: 2060.7 (Molecular weight), 2061.71 (Found:[M+H]<sup>+</sup>), 1031.38  
896 (Found:[M/2+H]<sup>+</sup>). UPLC-MS spectra were shown in Supplementary Fig. 32.

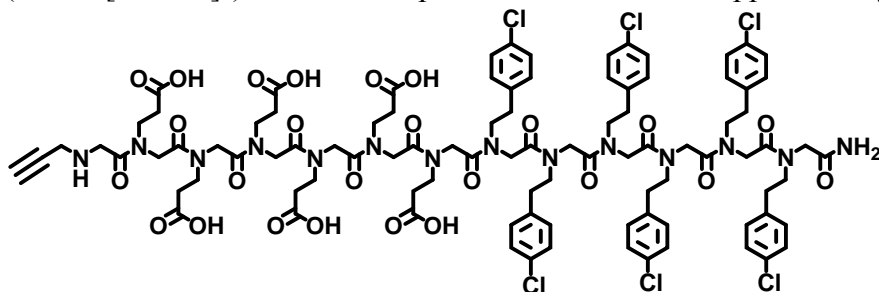

897  
898  
899

900 Pep-5: 2199.93 (Molecular weight), 2200.41 (Found:[M+H]<sup>+</sup>), 1100.4 (Found:  
901 [M/2+H]<sup>+</sup>). UPLC-MS spectra were shown in Supplementary Fig. 33.

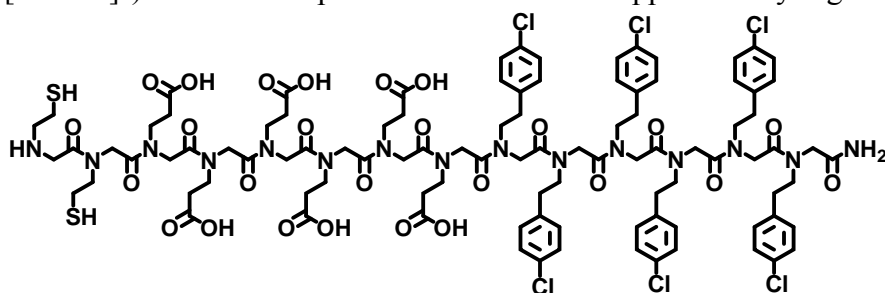

902  
903

904 Pep-6: 1965.6 (Molecular weight), 1966.3 (Found:[M+H]<sup>+</sup>), 983.4 (Found: [M/2+H]<sup>+</sup>).  
905 UPLC-MS spectra were shown in Supplementary Fig. 34.  
906

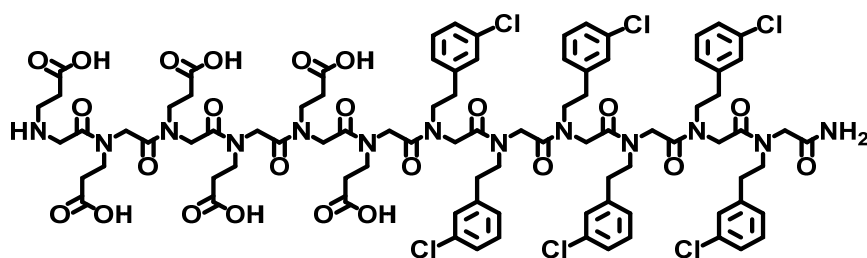

907

908 Pep-7: 1965.6 (Molecular weight), 1966.4 (Found:[M+H]<sup>+</sup>), 983.6 (Found: [M/2+H]<sup>+</sup>).  
909 UPLC-MS spectra were shown in Supplementary Fig. 35.  
910

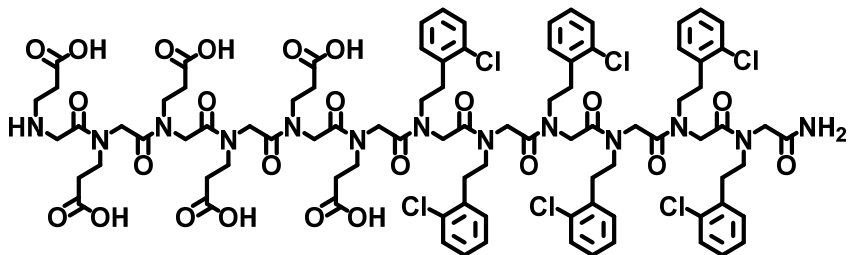

911  
912

913 Pep-8 [(N<sub>4</sub>-Clpe)<sub>3</sub>Nce<sub>6</sub>]: 1378.7 (Molecular weight), 1379.5 (Found:[M+H]<sup>+</sup>). UPLC-MS  
914 spectra were shown in Supplementary Fig. 36.

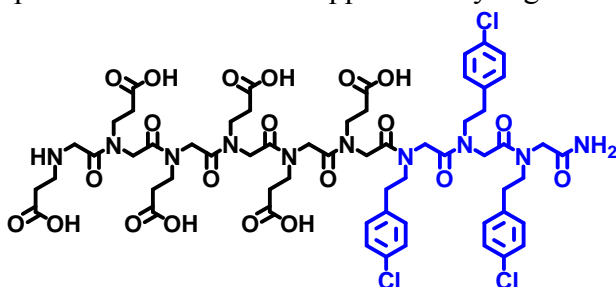

915  
916

917 Pep-9 [(N<sub>4</sub>-Clpe)<sub>6</sub>Nce<sub>3</sub>]: 1578.3 (Molecular weight), 1579.6 (Found:[M+H]<sup>+</sup>). UPLC-MS  
918 spectra were shown in Supplementary Fig. 37.

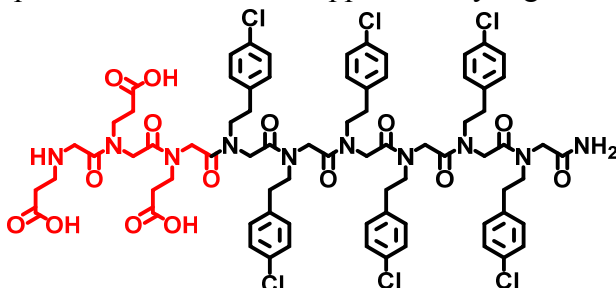

919  
920

921 Pep-10 [(N<sub>4</sub>-Clpe)<sub>6</sub>Nte<sub>3</sub>, Nte = N-2-(2-(2-methoxyethoxy)ethoxy)ethylglycine]: 1800.6  
922 (Molecular weight), 1801.6 (Found:[M+H]<sup>+</sup>), 901.8 (Found:[M/2+H]<sup>+</sup>). UPLC-MS  
923 spectra were shown in Supplementary Fig. 38.  
924

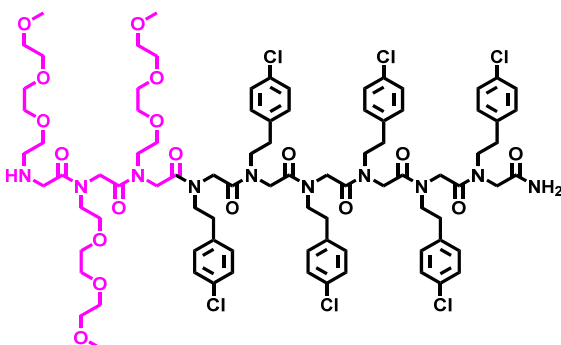

925

926 Pep-11 [(N<sub>4-Cl</sub>pe)<sub>6</sub>(NceNae)<sub>3</sub>]: 1878.6 (Molecular weight), 1881.4 (Found:[M+H]<sup>+</sup>),  
927 940.1 (Found: [M/2+H]<sup>+</sup>). UPLC-MS spectra were shown in Supplementary Fig. 39.

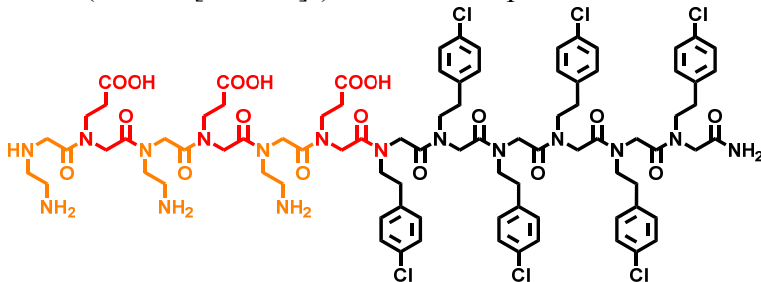

928  
929  
930

931 Pep-12 [(Nhex)<sub>2</sub>(N4-clpe)<sub>6</sub>(Nce)<sub>6</sub>]: 2248.0 (Molecular weight), 2248.7 (Found:[M+H]<sup>+</sup>),  
932 1124.8 (Found: [M/2+H]<sup>+</sup>). UPLC-MS spectra were shown in Supplementary Fig. 40.

933

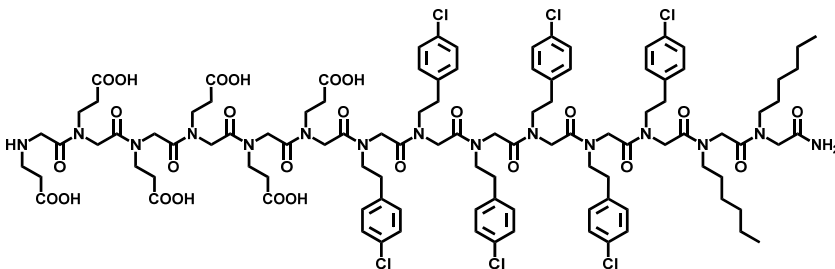

934  
935  
936

937 Pep-13 [(Nhex)<sub>6</sub>(Nce)<sub>6</sub>]: 1639.0 (Molecular weight), 1640.0 (Found:[M+H]<sup>+</sup>). UPLC-MS  
938 spectra were shown in Supplementary Fig. 41.

939

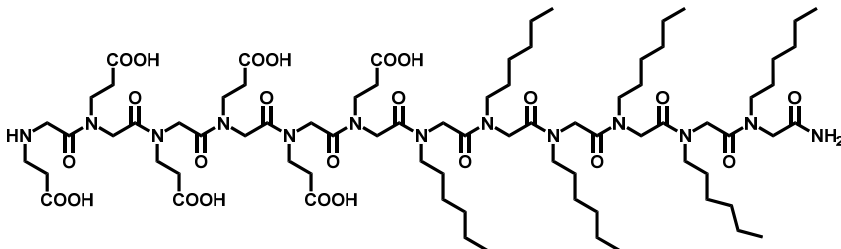

940  
941

942 Pep-14 [(Nhex)<sub>12</sub>(Nce)<sub>6</sub>]: 2486.3 (Molecular weight), 2486.5 (Found:[M]<sup>+</sup>), 1243.8  
943 (Found: [M/2]<sup>+</sup>). UPLC-MS spectra were shown in Supplementary Fig. 42.

944

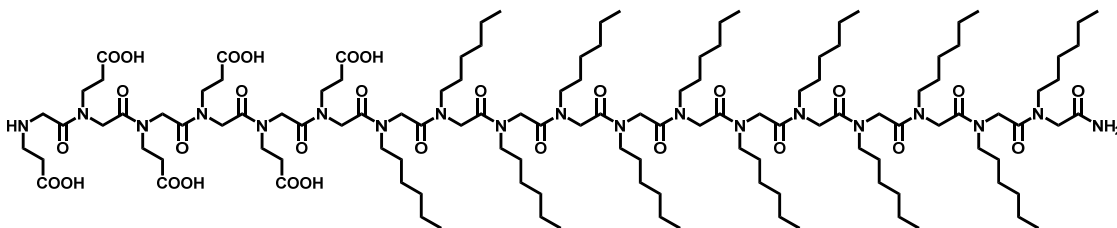

945  
946  
947  
948

949 1-Ntyr-Pep-2: 2142.8 (Molecular weight), 2143.4 (Found:[M+H]<sup>+</sup>), 1072.3  
950 (Found:[M/2+H]<sup>+</sup>). UPLC-MS spectra were shown in Supplementary Fig. 43.

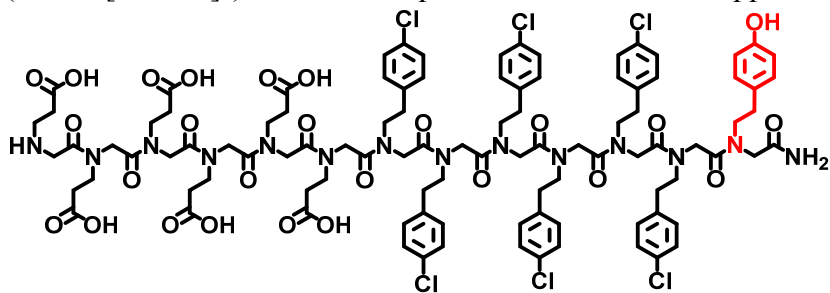

951  
952

953 1-Npyr-Pep-2: 2236.92 (Molecular weight), 2237.70 (Found: [M+H]<sup>+</sup>), 1119.59  
954 (Found:[M/2+H]<sup>+</sup>). UPLC-MS spectra were shown in Supplementary Fig. 44.

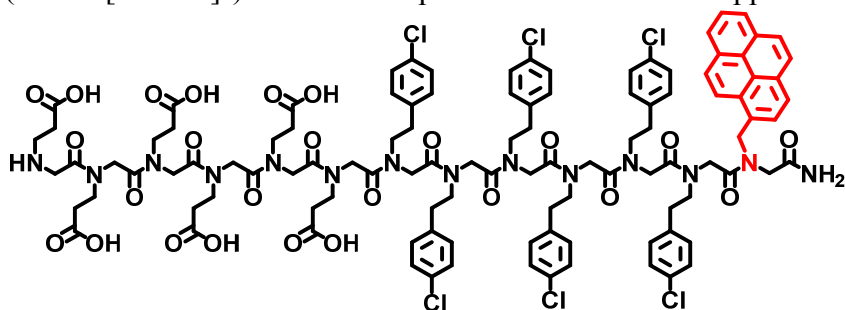

955  
956

957 1-Nhex-Pep-2: 2106.81 (Molecular weight), 2108.15 (Found:[M+H]<sup>+</sup>), 1054.25  
958 (Found:[M/2]<sup>+</sup>). UPLC-MS spectra were shown in Supplementary Fig. 45.

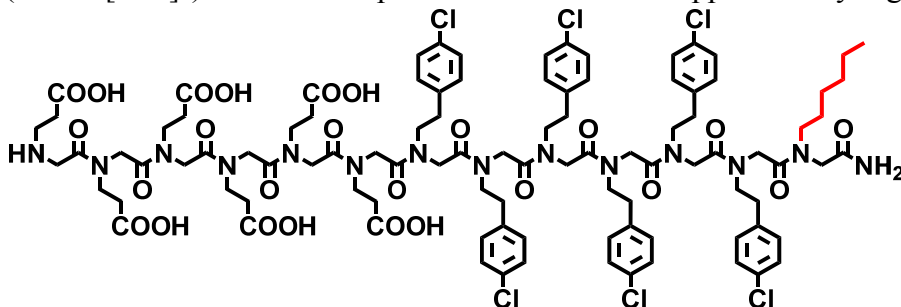

959  
960

961 1,8-(Nazo)<sub>2</sub>-Pep-2: 2240.12 (Molecular weight), 2440.22 (Found:[M]<sup>+</sup>), 1221.0 (Found:  
962 [M/2+H]<sup>+</sup>). UPLC-MS spectra were shown in Supplementary Fig. 46.

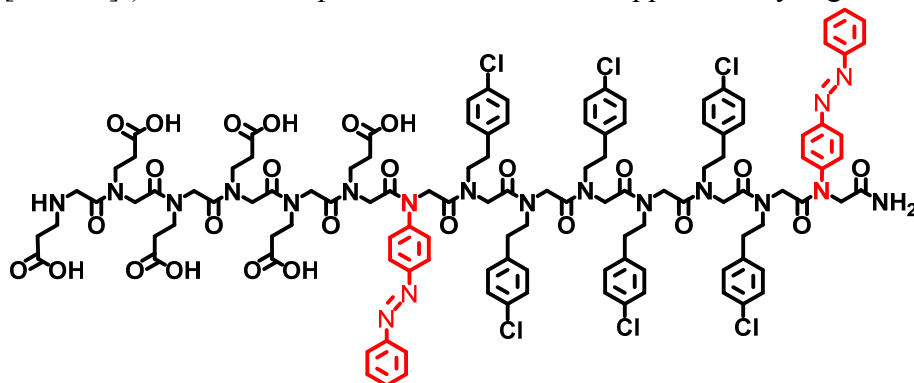

963

964 1,8-(Ntrp)<sub>2</sub>-**Pep-2**: 2366.08 (Molecular weight), 2367.79 (Found:[M+H]<sup>+</sup>), 1184.47  
965 (Found: [M/2+H]<sup>+</sup>). UPLC-MS spectra were shown in Supplementary Fig. 47.

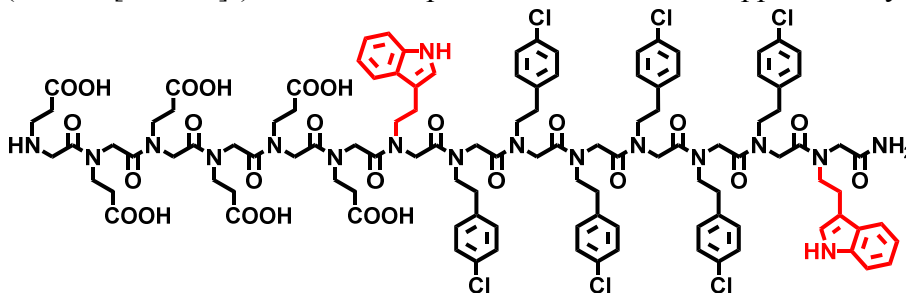

966  
967

968 1,8-(Nse)<sub>2</sub>-**Pep-2**: 2199.93 (Molecular weight), 2201.54 (Found:[M+H]<sup>+</sup>), 1099.63  
969 [M/2+H]<sup>+</sup>). UPLC-MS spectra were shown in Supplementary Fig. 48.

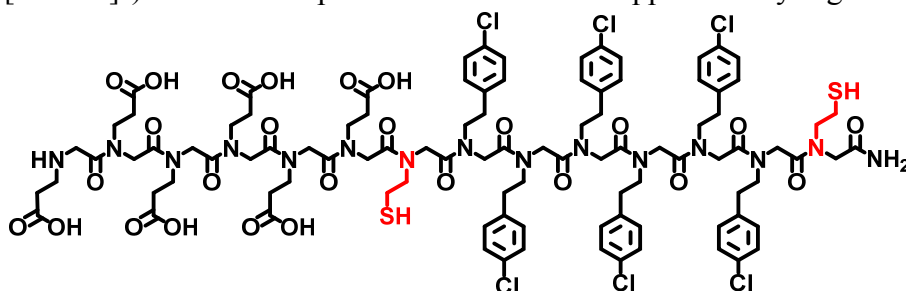

970  
971

972 1,8-(Ntyr)<sub>2</sub>-**Pep-2**: 2319.99 (Molecular weight), 2321.48 (Found:[M+H]<sup>+</sup>), 1160.24  
973 (Found:[M/2]<sup>+</sup>). UPLC-MS spectra were shown in Supplementary Fig. 49.

974

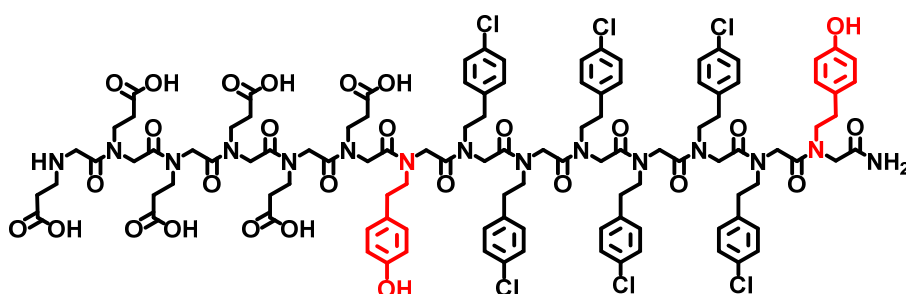

975  
976

977 1-Nse-8-Ntyr-**Pep-2**: 2259.97 (Molecular weight), 2261.4 (Found:[M+H]<sup>+</sup>), 1131.59  
978 (Found: [M/2+H]<sup>+</sup>). UPLC-MS spectra were shown in Supplementary Fig. 50.

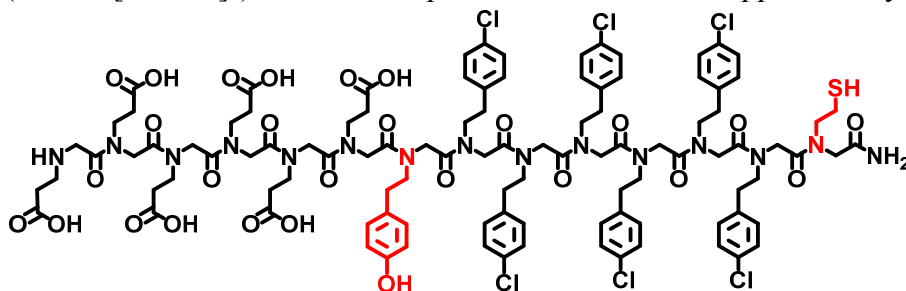

979  
980



981 13-Nte-Pep-2: 2168.84 (Molecular weight), 2169.66 (Found:[M+H]<sup>+</sup>), 1084.41 (Found:  
982 [M/2]<sup>+</sup>). UPLC-MS spectra were shown in Supplementary Fig. 51.

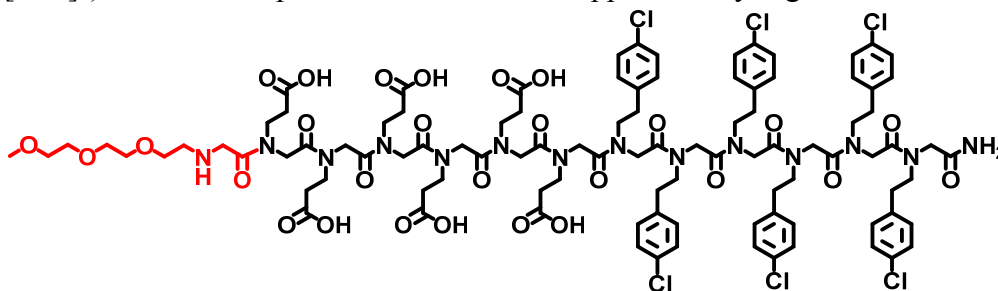

983  
984

985 13-Nhis-Pep-2: 2116.77 (Molecular weight), 2116.77 (Found:[M]<sup>+</sup>), 1058.75 (Found:  
986 [M/2]<sup>+</sup>). UPLC-MS spectra were shown in Supplementary Fig. 52.

987

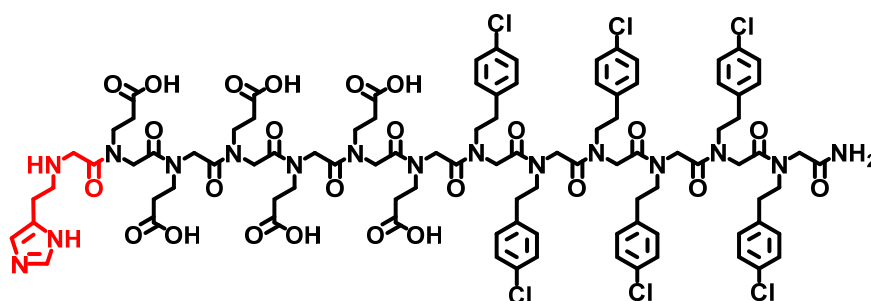

988  
989

990 13-Ntyr-Pep-2: 2142.8 (Molecular weight), 2143.48 (Found:[M+H]<sup>+</sup>), 1072.25 (Found:  
991 [M/2+H]<sup>+</sup>). UPLC-MS spectra were shown in Supplementary Fig. 53.

992

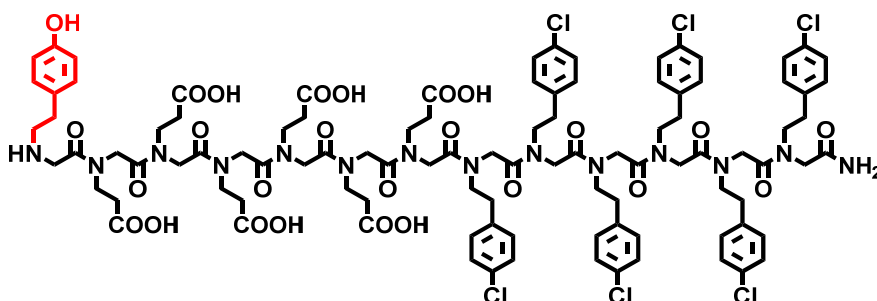

993  
994

995 13-Nbce-Pep-2: 2288.94 (Molecular weight), 2289.23 (Found:[M]<sup>+</sup>), 1144.64 (Found:  
996 [M/2]<sup>+</sup>). UPLC-MS spectra were shown in Supplementary Fig. 54.

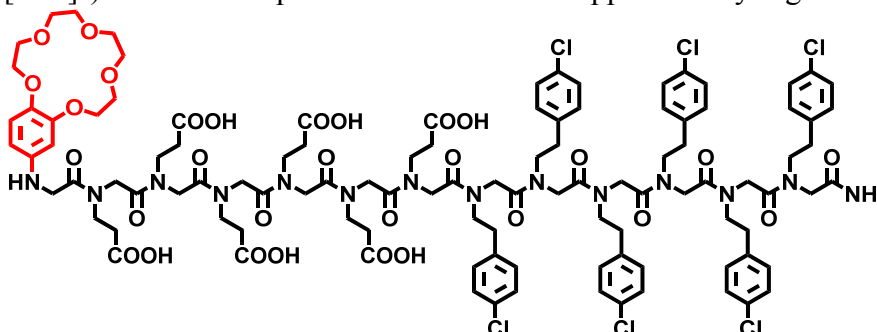

997

998 1,14-(Nse)<sub>2</sub>-**Pep-2**: 2199.93 (Molecular weight), 2201.01 (Found:[M+H]<sup>+</sup>), 1100.83  
999 (Found: [M/2+H]<sup>+</sup>). UPLC-MS spectra were shown in Supplementary Fig. 55.

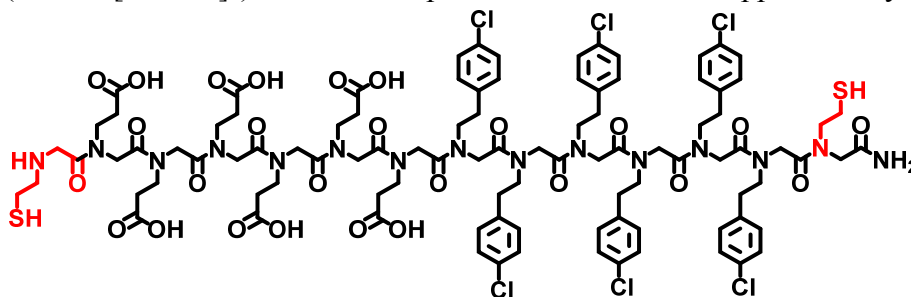

1000  
1001

1002 Ncd-**Pep-2**: 3139.6 (Molecular weight), 1571.1 (Found: [M/2+H]<sup>+</sup>). UPLC-MS spectra  
1003 were shown in Supplementary Fig. 56.

1004

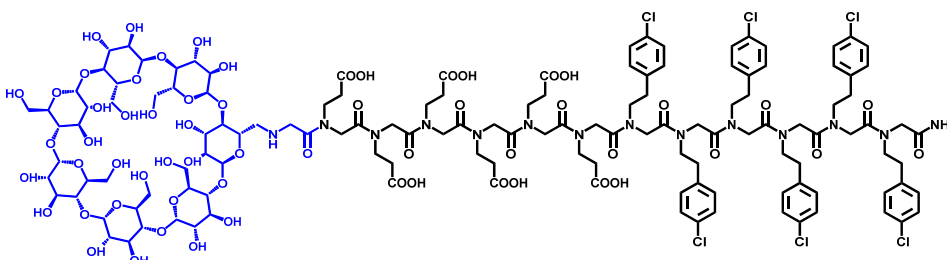

1005  
1006

1007 NHS-Rhodamine-labeled **Pep-3**: 2491.2 (Molecular weight), 2492.8 (Found:[M+H]<sup>+</sup>),  
1008 1246.6 (Found: [M/2+H]<sup>+</sup>). UPLC-MS spectra were shown in Supplementary Fig. 57.

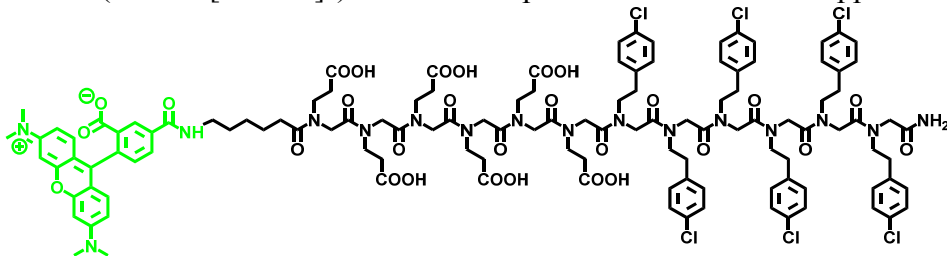

1009  
1010

### 1011 Self-assembly of membrane-mimetic 2D nanomaterials from lipid-like peptoids

1012 Lyophilized and HPLC-grade peptoids were dissolved in the mixture of water and  
1013 acetonitrile (v/v = 1:1) to make 5.0 mM clear solution, this clear solution was then  
1014 transferred to 4 °C refrigerator for slow evaporation. Suspensions or gel-like materials  
1015 containing a large amount of crystalline membranes were formed after a few days.

1016

1017 For testing the influence of ionic strength in peptoid membrane formation, lyophilized  
1018 **Pep-3** powders were dissolved in the mixture of water and acetonitrile (v/v = 1:1) with  
1019 presence of NaCl (0.5 M) to make 5.0 mM clear solution for slow crystallization at 4 °C.

1020

1021 For testing the change of solution pH in peptoid membrane formation, lyophilized  
1022 peptoids were dissolved in the mixture of water and acetonitrile (v/v = 1:1) to make 5.0  
1023 mM clear solution, then the above solution pH was adjusted by adding 2.0 M NaOH

1024 aqueous solution to a final pH value of 5.6, 7.4 or 10.50. This obtained clear solution was  
1025 later used for slow evaporation in 4 °C refrigerator. Suspensions or gel-like materials  
1026 containing a large amount of crystalline membranes were formed after a few days.

1027

1028 For self-assembly in the mixture of PBS and CH<sub>3</sub>CN: Lyophilized peptoids were  
1029 dissolved in the mixture of 1X PBS buffer and acetonitrile (v/v = 1:1) to make 5.0 mM  
1030 clear solution, this clear solution was then transferred to 4 °C refrigerator for slow  
1031 evaporation. Suspensions or gel-like materials containing a large amount of crystalline  
1032 membranes were formed after a few days.

1033

### 1034 **Characterizations of peptoid membranes**

1035 Both *ex situ* (in air) and *in situ* (in fluid) AFM imaging were done in tapping mode or  
1036 ScanAsyst mode at room temperature with a Bruker MultiMode 8. AFM samples were  
1037 prepared by diluting peptoid membrane samples with water and using freshly cleaved  
1038 mica as substrate. For stability test, pre-assembled Pep-3 membranes were incubated with  
1039 water in AFM fluid cell, *in situ* AFM images at different time points were collected. Pep-  
1040 3 stability in other solvents, such as pre-mixed water and acetonitrile (v/v = 1:1), ethanol,  
1041 acetonitrile, aqueous solution with different salts and salt concentrations, was tested  
1042 similarly by injected solvent into fluid cells or by fully exchanging these solvent with  
1043 pre-injected waters in fluid cells. Similar protocols were used to prepare samples for salt-  
1044 induced membrane thickness changes. For thermal stability test, gel-like materials of pre-  
1045 assembled peptoid membranes in a 4.0 mL glass vial was placed in a 60 °C oven  
1046 overnight, and then used to prepare *ex situ* AFM samples by diluting them with water on  
1047 freshly-cleaved mica surface. For the *in situ* formation of single-layer Pep-3 membranes  
1048 on mica surface: 2.0 mM aqueous solution of Pep-3 were prepared by mixing lyophilized  
1049 3.0 μmol Pep-3 in 1.5 mL water, and 10 μL 2.0 M NaOH was added to assist peptoid  
1050 dissolution; 25 μL the resulting 2.0 mM Pep-3 solution was diluted with 0.5 mL water  
1051 and then well-mixed with 10 μL 0.1% TFA to get clear solution for *in situ* AFM studies.  
1052 For Pep-3 membrane repair experiment, pre-assembled Pep-3 membranes were first  
1053 deposited on mica surfaces and incubated with water. Selected membranes were  
1054 purposely scratched to create defects using the AFM tip, and then aqueous solution of  
1055 Pep-3 (10 μM, pH 4.3) was injected into fluid cell for *in situ* membrane repair. For  
1056 patterning Ncd-Pep-2, an aqueous solution of Ncd-Pep-2 instead of Pep-3 was used for  
1057 repair of defects-containing Pep-2 membranes.

1058

1059 TEM samples were prepared by pipetting one drop of water diluted peptoid membrane  
1060 gels or suspensions onto carbon-coated electron microscopy grid; 2% phosphotungstic  
1061 acid was then used for negative staining. TEM measurements were conducted on a 200-  
1062 kV FEI Tecnai TEM microscope. SEM samples were prepared by pipetting one drop of  
1063 water diluted peptoid membrane gels or suspensions onto silicon substrates. SEM  
1064 measurements were performed on a FEI Helios Nanolab dual-beam focused ion  
1065 beam/scanning electron microscopy (FIB/SEM) microscope. Powder X-ray diffraction  
1066 data were collected at a multiple-wavelength anomalous diffraction and monochromatic  
1067 macromolecular crystallography beamline, 8.3.1, at the Advanced Light Source located at  
1068 Lawrence Berkeley National Laboratory. Beamline 8.3.1 has a 5 T single pole superbend

1069 source with an energy range of 5 - 17 keV. Data were collected with a 3×3 CCD array  
1070 (ADSC Q315r) detector at a wavelength of 1.1159 Å. Datasets were collected with the  
1071 detector 200 mm from the sample. Peptoid membrane suspensions or pellets were  
1072 pipetted onto a Kapton mesh (MiTeGen) and dry. Data was processed with custom  
1073 Python scripts.  
1074

## 1075 **Molecular Dynamics Simulations**

1076 Since peptoid topologies and parameters are not present in standard MD forcefields, we  
1077 generated them using the generalized amber forcefield (GAFF) and the Antechamber  
1078 program.<sup>7,8</sup> The AM1-BCC model<sup>9,10</sup> was used to generate partial charges. GAFF  
1079 parameters were converted into GROMACS-compatible topologies using the AcPype  
1080 program,<sup>11</sup> and simulations were carried out using the AMBER03 forcefield<sup>12</sup> with the  
1081 added peptoid parameters. GAFF-based peptoid models have been showed to correctly  
1082 predict peptoid crystal structures.<sup>13</sup> In addition, a recently developed CHARMM-based  
1083 model accurately predicts the free energy barrier between the *cis* and *trans* isomers of the  
1084 peptoid backbone amide bond.<sup>14</sup>

1085 Polymers were constructed in extended starting conformations with all-*trans* backbone  
1086 amides using an in-house python script. While *cis* backbone amides are important in  
1087 structures like the peptoid polyproline I helix<sup>15</sup> and a cyclic peptoid nonamer,<sup>13</sup> the *trans*  
1088 configuration is preferred by about 3:1 for peptoids without branched sidechains.<sup>16</sup> In  
1089 addition, the barrier for *cis/trans* isomerization in peptoids is about  $29*kT$ ,<sup>17</sup> which is  
1090 beyond the thermal motions that can be sampled on the simulation timescale.  
1091 Furthermore, peptoid assembly into extended planar nanostructures like the peptoid  
1092 nanosheet and membrane requires the linear, untwisted  $\Sigma$ -strand backbone  
1093 conformation,<sup>18</sup> which only forms with all-*trans* backbone amides.

1094 We start a variety of configurations with half the peptoids oriented up along the z-axis  
1095 and half oriented down. The hydrophobic region ( $N_{4-Clpe}$  residues) is placed in the center  
1096 to minimize exposed hydrophobic surface area. The sidechains are oriented along the y-  
1097 axis, and the peptoids are stacked along the x-axis. Various system sizes were tried  
1098 including 8 x 4, 16 x 4, and 16 x 6, and each system is solvated with a 2-nm layer of  
1099 water in the z direction.

1100 After a steepest-descent minimization of the starting structure, the system was gradually  
1101 heated from 0 to 300K in 50K increments, with 30 ps at each temperature followed by  
1102 100 ps of relaxation at 300 K. MD simulations were performed with GROMACS 4.6.4  
1103 <sup>19</sup>. We used 1.0-nm cutoffs for van der Waals and Coulombic interactions and the  
1104 particle-mesh Ewald method<sup>20</sup> for long-range electrostatic interactions. The simulations  
1105 were performed in the NPT ensemble with a Parrinello-Rahman barostat<sup>21</sup> with a 1 ps  
1106 coupling time at 1 bar and anisotropic pressure coupling. A Nose-Hoover thermostat<sup>22</sup> at  
1107 300 K with 0.2 ps coupling time was applied separately to the polymer and to the solution  
1108 (including ions). Simulations were performed for 500 to 1000 ns using a timestep of 2 fs.

## 1109 **X-ray diffraction calculations**

1110 We calculate X-ray (powder) diffraction from simulation structures according to the  
1111 formula

1112  $I(\mathbf{q}) = \left| \sum_{j=1}^N f_j(q) \exp(i\mathbf{q} \cdot \mathbf{r}_j) \right|,$  (1)

1113 where the sum is over all atoms,  $f_j(q)$  is the Cromer-Mann scattering factor for atom  $j$  at  
 1114 magnitude  $q$  &, and  $\mathbf{r}_j$  are the coordinates of atom  $j$ . We choose  $N_q = N_x * N_y * N_z$ .  $N_d =$   
 1115  $b_d/dr$  rounded to the nearest integer, where  $L_d$  is the length of the box vector in dimension  
 1116  $d$ , and  $dr$  is the (real space) grid spacing, which we set to 0.5 Å. For each triplet in  $i,j,k$   
 1117 space, the corresponding  $\mathbf{q}$  vector is  $2\pi*(i/L_x, j/L_y, k/L_z)$ . Since computed intensity scales  
 1118 with the square of the system size, we normalize the computed intensity by the square of  
 1119 the number of peptoid atoms.

1120 In addition, to facilitate identification of the most important peaks for comparison  
 1121 between computation and experiment, we smoothed the computed XRD using a Gaussian  
 1122 function. For each reflection in each structure, we distribute the intensity over  $q$  space  
 1123 using a Gaussian

1124  $I(q) = \frac{I_0(q_0)}{\sigma\sqrt{2\pi}} \exp\left(-\frac{(q-q_0)^2}{2\sigma^2}\right),$  (2)

1125 where  $I_0$  and  $q_0$  are the intensity and  $q$  (magnitude) of the original reflection, respectively.  
 1126 We choose  $\sigma$  so that 90% of the probability density falls within 0.025 Å<sup>-1</sup> of  $q_0$ , which  
 1127 leads to  $\sigma = 0.0152$  Å<sup>-1</sup>.

1128

1129 **Supplementary References**

1130

- 1131 1 Guo, W. H., Li, J. J., Wang, Y. A. & Peng, X. G. Luminescent CdSe/CdS  
 1132 core/shell nanocrystals in dendron boxes: Superior chemical, photochemical and  
 1133 thermal stability. *J. Am. Chem. Soc.* **125**, 3901-3909 (2003).  
 1134 2 Sun, J., Stone, G. M., Balsara, N. P. & Zuckermann, R. N. Structure-conductivity  
 1135 relationship for peptoid-based PEO-mimetic polymer electrolytes.  
 1136 *Macromolecules* **45**, 5151-5156 (2012).  
 1137 3 Petter, R. C., Salek, J. S., Sikorski, C. T., Kumaravel, G. & Lin, F. T. Cooperative  
 1138 binding by aggregated mono-6-(alkylamino)-beta-cyclodextrins. *J. Am. Chem.*  
 1139 *Soc.* **112**, 3860-3868 (1990).  
 1140 4 Chen, C.-L., Qi, J., Tao, J., Zuckermann, R. N. & DeYoreo, J. J. Tuning calcite  
 1141 morphology and growth acceleration by a rational design of highly stable protein-  
 1142 mimetics. *Sci. Rep.* **4** (2014).  
 1143 5 Zuckermann, R. N., Kerr, J. M., Kent, S. B. H. & Moos, W. H. Efficient method  
 1144 for the preparation of peptoids oligo(N-substituted glycines) by submonomer  
 1145 solid-phase synthesis. *J. Am. Chem. Soc.* **114**, 10646-10647 (1992).  
 1146 6 Burkoth, T. S., Fafarman, A. T., Charych, D. H., Connolly, M. D. & Zuckermann,  
 1147 R. N. Incorporation of unprotected heterocyclic side chains into peptoid oligomers  
 1148 via solid-phase submonomer synthesis. *J. Am. Chem. Soc.* **125**, 8841-8845 (2003).  
 1149 7 Wang, J., Wang, W., Kollman, P. A. & Case, D. A. Automatic atom type and  
 1150 bond type perception in molecular mechanical calculations. *J. Mol. Graph.*  
 1151 *Model.* **25**, 247-260 (2006).

1152 8 Wang, J. M., Wolf, R. M., Caldwell, J. W., Kollman, P. A. & Case, D. A.  
1153 Development and testing of a general amber force field. *J. Comput. Chem.* **25**,  
1154 1157-1174 (2004).

1155 9 Jakalian, A., Bush, B. L., Jack, D. B. & Bayly, C. I. Fast, efficient generation of  
1156 high-quality atomic Charges. AM1-BCC model: I. Method. *J. Comput. Chem.* **21**,  
1157 132-146 (2000).

1158 10 Jakalian, A., Jack, D. B. & Bayly, C. I. Fast, efficient generation of high-quality  
1159 atomic charges. AM1-BCC model: II. Parameterization and validation. *J. Comput.*  
1160 *Chem.* **23**, 1623-1641 (2002).

1161 11 Sousa da Silva, A. & Vranken, W. ACPYPE - AnteChamber PYthon Parser  
1162 interfacE. *BMC Res Notes* **5**, 1-8 (2012).

1163 12 Duan, Y. *et al.* A point-charge force field for molecular mechanics simulations of  
1164 proteins based on condensed-phase quantum mechanical calculations. *J. Comput.*  
1165 *Chem.* **24**, 1999-2012 (2003).

1166 13 Butterfoss, G. L. *et al.* De novo structure prediction and experimental  
1167 characterization of folded peptoid oligomers. *Proc. Natl. Acad. Sci. U. S. A.* **109**,  
1168 14320-14325 (2012).

1169 14 Mirijanian, D. T., Mannige, R. V., Zuckermann, R. N. & Whitelam, S.  
1170 Development and use of an atomistic CHARMM-based forcefield for peptoid  
1171 simulation. *J. Comput. Chem.* **35**, 360-370 (2014).

1172 15 Wu, C. W., Sanborn, T. J., Huang, K., Zuckermann, R. N. & Barron, A. E.  
1173 Peptoid oligomers with  $\alpha$ -chiral, aromatic side chains: Sequence requirements for  
1174 the formation of stable peptoid helices. *J. Am. Chem. Soc.* **123**, 6778-6784 (2001).

1175 16 Sui, Q., Borchardt, D. & Rabenstein, D. L. Kinetics and equilibria of cis/trans  
1176 isomerization of backbone amide bonds in peptoids. *J. Am. Chem. Soc.* **129**,  
1177 12042-12048 (2007).

1178 17 Gasparro, F. P. & Kolodny, N. H. NMR determination of the rotational barrier in  
1179 N,N-dimethylacetamide. A physical chemistry experiment. *J. Chem. Edu.* **54**, 258  
1180 (1977).

1181 18 Mannige, R. V. *et al.* Peptoid nanosheets exhibit a new secondary-structure motif.  
1182 *Nature* **526**, 415-420 (2015).

1183 19 Pronk, S. *et al.* GROMACS 4.5: a high-throughput and highly parallel open  
1184 source molecular simulation toolkit. *Bioinformatics* **29**, 845-854 (2013).

1185 20 Darden, T., York, D. & Pedersen, L. Particle mesh ewald - an n.log(n) method for  
1186 ewald sums in large systems. *J. Chem. Phys.* **98**, 10089-10092 (1993).

1187 21 Parrinello, M. & Rahman, A. polymorphic transitions in single-crystals - a new  
1188 molecular-dynamics method. *J. Appl. Phys.* **52**, 7182-7190 (1981).

1189 22 Hoover, W. G. Canonical dynamics - equilibrium phase-space distributions. *Phys.*  
1190 *Rev. A* **31**, 1695-1697 (1985).

1191
